# Supplementary material for: Ximaoornatins A–C, Polyoxygenated Diterpenoids from the Hainan Soft Coral Sinularia ornata
Source: MDPI journal article supplement (doi:10.3390/md20030218), 2022-03-20
Supplement: s1 [file s1]

# **Ximaoornatins A–C, Polyoxygenated Diterpenoids from the Hainan Soft Coral *Sinularia ornata***

**Li-Li Sun** <sup>1,2</sup>, **Xu-Wen Li** <sup>1,2,3,\*</sup> and **Yue-Wei Guo** <sup>1,2,3,\*</sup>

<sup>1</sup> State Key Laboratory of Drug Research, Shanghai Institute of Materia Medica, Chinese Academy of Sciences, 555 Zu Chong Zhi Road, Zhangjiang Hi-Tech Park, Shanghai 201203, China; sunlili202105@126.com (L.-L.S.)

<sup>2</sup> University of Chinese Academy of Sciences, No. 19A Yuquan Road, Beijing 100049, China

<sup>3</sup> Drug Discovery Shandong Laboratory, Bohai Rim Advanced Research Institute for Drug Discovery, Yantai 264117, China

\* Correspondence: xwli@simm.ac.cn (X.-W.L.); ywguo@simm.ac.cn (Y.-W.G.); Tel.: +86-21-50805813 (Y.-W.G.)

# Contents

|                                                           |   |
|-----------------------------------------------------------|---|
| 1. Experimental Section .....                             | 3 |
| 1.1 General experimental procedures .....                 | 3 |
| 1.2 Biological materials .....                            | 3 |
| 1.3 Extraction and isolation .....                        | 3 |
| 2. Original data for compounds <b>1–5</b> .....           | 5 |
| 2.1 X-ray crystallographic analyses of <b>1</b> .....     | 5 |
| 2.2 NMR, MS, and IR spectra of compounds <b>1–5</b> ..... | 7 |

# 1. Experimental Section

## 1.1 General experimental procedures

IR spectra was recorded on a Nicolet 6700 spectrometer (Thermo Scientific, Waltham, MA, USA); peaks are reported in  $\text{cm}^{-1}$ . Melting points were measured on an X-4 digital micro-melting point apparatus. Optical rotations were measured on a Perkin-Elmer 241MC polarimeter (PerkinElmer, Fremont, CA, USA). The NMR spectra were measured at 300 K on DRX 500 and Avance 600 MHz NMR spectrometers (Bruker Biospin AG, Fallanden, Germany); Chemical shifts are reported in parts per million ( $\delta$ ) in  $\text{CDCl}_3$  ( $\delta_{\text{H}}$  reported referred to  $\text{CHCl}_3$  at 7.26 ppm;  $\delta_{\text{C}}$  reported referred to  $\text{CDCl}_3$  at 77.16 ppm) and coupling constants ( $J$ ) in Hz; assignments were supported by  $^1\text{H}$ - $^1\text{H}$  COSY, HSQC, HMBC, and NOESY experiments. HR-ESIMS was carried out on a Waters Q-TOF Ultima mass spectrometer (Waters, MA, USA). HREIMS spectra was carried out on a Thermo DFS mass spectrometer. Semi-preparative HPLC was performed on an Agilent-1260 system equipped with a DAD G1315D detector using ODS-HG-5 (250 mm  $\times$  9.4 mm, 5  $\mu\text{m}$ ) by eluting with  $\text{CH}_3\text{OH}$ - $\text{H}_2\text{O}$  or  $\text{CH}_3\text{CN}$ - $\text{H}_2\text{O}$  system at 3.0 mL/min. Commercial silica gel (200–300 and 300–400 mesh; Qingdao, China) was used for column chromatography (CC). Precoated Si gel plates (Merck Chemicals (Shanghai) Co., Ltd, G60 F254) were used for analytical TLC. Sephadex LH-20 (Amersham Biosciences) was also used for CC. All solvents used for column chromatography and HPLC were of analytical grade (Shanghai Chemical Reagents Co., Ltd.) and chromatographic grade (Dikma Technologies Inc.), respectively. X-ray diffraction studies were carried out on a Bruker D8 Venture diffractometer with Cu K $\alpha$  radiation ( $\lambda = 1.54178 \text{ \AA}$ ).

## 1.2 Biological materials

Specimens of the soft coral *Sinularia ornata*, identified by Prof. Xiu-Bao Li from Hainan university, were collected along the coast of Ximao Island, Hainan province, China, in 2018, and were frozen immediately after collection. A voucher specimen (18-XD-07) was deposited at Shanghai Institute of Materia Medica, Chinese Academy of Sciences, Shanghai, China.

## 1.3 Extraction and isolation

The frozen materials (943 g, dry weight) were cut into pieces and extracted exhaustively with  $\text{Me}_2\text{CO}$  at room temperature. The organic extract was evaporated to give a brown residue, which was partitioned between  $\text{Et}_2\text{O}$  and  $\text{H}_2\text{O}$ . The  $\text{Et}_2\text{O}$  solution was concentrated under reduced pressure to give a dark brown residue (36.3 g), which was fractionated by gradient Si gel (200–300 mesh) column chromatography (CC) (0  $\rightarrow$  100%  $\text{Et}_2\text{O}$  in petroleum ether (PE), yielding eight fractions (A–F). Fraction D was isolated by Sephadex LH-20 ( $\text{PE}/\text{CH}_2\text{Cl}_2/\text{MeOH}$ , 2:1:1), followed by silica gel CC ( $\text{PE}/\text{CH}_2\text{Cl}_2$ , 10:0  $\rightarrow$  0:10) to give two subfractions (D2E and D2G). Fraction D2E was finally purified by reversed-phase HPLC ( $\text{MeCN}/\text{H}_2\text{O}$ , 70:30; 3.0 mL/min) to give compound **1** (11.6 mg,  $t_{\text{R}} = 17.1$  min) and **4** (12.3 mg,  $t_{\text{R}} = 12.3$  min), while compound **2** (1.2 mg,  $t_{\text{R}} = 18.6$  min) was isolated from subfraction D2G by RP-HPLC ( $\text{MeCN}/\text{H}_2\text{O}$ , 60:40; 3.0 mL/min). Fraction E was fractionated by Sephadex LH-20 ( $\text{PE}/\text{CH}_2\text{Cl}_2/\text{MeOH}$ , 2:1:1), followed by silica gel CC ( $\text{PE}/\text{Et}_2\text{O}$ , 10:0  $\rightarrow$  0:10) to give two subfractions (E3E and E3H). Subfraction E3E was further purified by stepwise HPLC ( $\text{MeCN}/\text{H}_2\text{O}$ , 62:38  $\rightarrow$  70:30; 3.0 mL/min) to obtain compound **5** (17.0 mg,  $t_{\text{R}} = 5.3$  min). Similarly, compound **3** (2.0 mg,  $t_{\text{R}} = 13.5$  min) was isolated from fraction E3H by reversed-phase HPLC ( $\text{MeCN}/\text{H}_2\text{O}$ , 75:25  $\rightarrow$  98:2; 3.0 mL/min).

Ximaoornatin A (**1**): Colorless crystals; m.p. 166.2~166.4°C;  $[\alpha]_{\text{D}}^{20}$  -46.7 (*c* 0.35, CHCl<sub>3</sub>); IR (KBr)  $\nu_{\text{max}}$ = 3445, 2919, 2849, 1959, 1620, 1384, 1156, 1043 cm<sup>-1</sup>; <sup>1</sup>H and <sup>13</sup>C NMR data see [Table 1](#); HR-ESIMS *m/z* 487.2670 [M + Na]<sup>+</sup> (calcd. for C<sub>26</sub>H<sub>40</sub>NaO<sub>7</sub>, 487.2666).

Ximaoornatin B (**2**): Colorless oil;  $[\alpha]_{\text{D}}^{20}$  -15.4 (*c* 0.12, CHCl<sub>3</sub>); IR (KBr)  $\nu_{\text{max}}$ = 3441, 2960, 2924, 2870, 1959, 1732, 1620, 1384, 1260, 1074, 1040 cm<sup>-1</sup>; <sup>1</sup>H and <sup>13</sup>C NMR data see [Table 1](#); HR-EIMS *m/z* 492.3080 [M]<sup>+</sup> (calcd. for C<sub>28</sub>H<sub>44</sub>O<sub>7</sub>, 492.3082).

Ximaoornatin C (**3**): Colorless oil;  $[\alpha]_{\text{D}}^{20}$  -55.0 (*c* 0.11, CH<sub>3</sub>OH); IR (KBr)  $\nu_{\text{max}}$ = 3444, 2924, 1959, 1731, 1620, 1384, 1260, 1045, 800 cm<sup>-1</sup>; <sup>1</sup>H and <sup>13</sup>C NMR data see [Table 1](#); HR-EIMS *m/z* 422.2665 [M]<sup>+</sup> (calcd. for C<sub>24</sub>H<sub>38</sub>O<sub>6</sub>, 422.2663).

Litophynin K (**4**): Colorless oil;  $[\alpha]_{\text{D}}^{20}$  -58.4 (*c* 0.24, CHCl<sub>3</sub>); IR (KBr)  $\nu_{\text{max}}$ = 3446, 2925, 1959, 1733, 1665, 1384, 1247, 1097, 1051 cm<sup>-1</sup>; <sup>1</sup>H and <sup>13</sup>C NMR data see [Table 1](#); HR-ESIMS *m/z* 471.2718 [M + Na]<sup>+</sup> (calcd. for C<sub>26</sub>H<sub>40</sub>NaO<sub>6</sub>, 471.2717).



## 2. Original data for compounds 1–5

### 2.1 X-ray crystallographic analyses of 1

$C_{2.08}H_{3.2}O_{0.56}$ ,  $M_r = 37.17$ , monoclinic, crystal size  $0.15 \times 0.08 \times 0.05$  mm<sup>3</sup>, space group  $P2_1$ ,  $a = 11.0532(5)$  Å,  $b = 9.4225(4)$  Å,  $c = 12.3134(5)$  Å,  $V = 1271.54$  (9) Å<sup>3</sup>,  $Z = 25$ ,  $D_{\text{calcd}} = 1.213$  g/cm<sup>3</sup>,  $F(000) = 504.0$ , 19814 reflections measured ( $7.24^\circ \leq 2\theta \leq 149.14^\circ$ ), 5096 unique ( $R_{\text{int}} = 0.0470$ ,  $R_{\text{sigma}} = 0.0381$ ) which were used in all calculations. The final  $R_1$  was 0.0346 ( $I > 2\sigma(I)$ ) and  $wR_2$  was 0.0901 (all data). The X-ray measurements were made on a Bruker D8 Venture X-ray diffractometer with with Cu K $\alpha$  radiation ( $\lambda = 1.54178$  Å) at 170.0 K. The structure was solved with the ShelXT<sup>1</sup> structure solution program using Intrinsic Phasing and refined with the ShelXL<sup>2</sup> refinement package using Least Squares minimisation. Crystallographic data for **1** has been deposited at the Cambridge Crystallographic Data Centre (Deposition nos. CCDC 2126980). Copies of these data can be obtained free of charge via [www.ccdc.cam.ac.uk/conts/retrieving.html](http://www.ccdc.cam.ac.uk/conts/retrieving.html) or from the Cambridge Crystallographic Data Centre, 12 Union Road, Cambridge CB21EZ, UK. [Fax: (+44) 1223-336-033. E-mail: [deposit@ccdc.cam.ac.uk](mailto:deposit@ccdc.cam.ac.uk)].

### References

- (1) Sheldrick, G.M. *Acta Cryst.* **2015**, *A71*, 3-8.
- (2) Sheldrick, G.M. *Acta Cryst.* **2015**, *C71*, 3-8.

**Table S1.** X-ray crystallographic data for **1**.

|                                             |                                                               |
|---------------------------------------------|---------------------------------------------------------------|
| Empirical formula                           | C <sub>2.08</sub> H <sub>3.2</sub> O <sub>0.56</sub>          |
| Formula weight                              | 37.17                                                         |
| Temperature/K                               | 170.0                                                         |
| Crystal system                              | monoclinic                                                    |
| Space group                                 | P2 <sub>1</sub>                                               |
| a/Å                                         | 11.0532(5)                                                    |
| b/Å                                         | 9.4225(4)                                                     |
| c/Å                                         | 12.3134(5)                                                    |
| $\alpha$ /°                                 | 90                                                            |
| $\beta$ /°                                  | 97.470(2)                                                     |
| $\gamma$ /°                                 | 90                                                            |
| Volume/Å <sup>3</sup>                       | 1271.54 (9)                                                   |
| Z                                           | 25                                                            |
| $\rho_{\text{calc}}/\text{cm}^3$            | 1.213                                                         |
| $\mu/\text{mm}^{-1}$                        | 0.706                                                         |
| F(000)                                      | 504.0                                                         |
| Crystal size/mm <sup>3</sup>                | 0.15 × 0.08 × 0.05                                            |
| Radiation                                   | Cu K $\alpha$ ( $\lambda$ = 1.54178)                          |
| 2 $\Theta$ range for data collection/°      | 7.24 to 149.14                                                |
| Index ranges                                | -13 ≤ h ≤ 13, -11 ≤ k ≤ 11, -15 ≤ l ≤ 15                      |
| Reflections collected                       | 19814                                                         |
| Independent reflections                     | 5096 [R <sub>int</sub> = 0.0470, R <sub>sigma</sub> = 0.0381] |
| Data/restraints/parameters                  | 5096/1/305                                                    |
| Goodness-of-fit on F <sup>2</sup>           | 1.054                                                         |
| Final R indexes [ $I \geq 2\sigma(I)$ ]     | R <sub>1</sub> = 0.0346, wR <sub>2</sub> = 0.0878             |
| Final R indexes [all data]                  | R <sub>1</sub> = 0.0376, wR <sub>2</sub> = 0.0901             |
| Largest diff. peak/hole / e Å <sup>-3</sup> | 0.25/-0.15                                                    |
| Flack parameter                             | -0.09(7)                                                      |

## 2.2 NMR, MS, and IR spectra of compounds 1–5

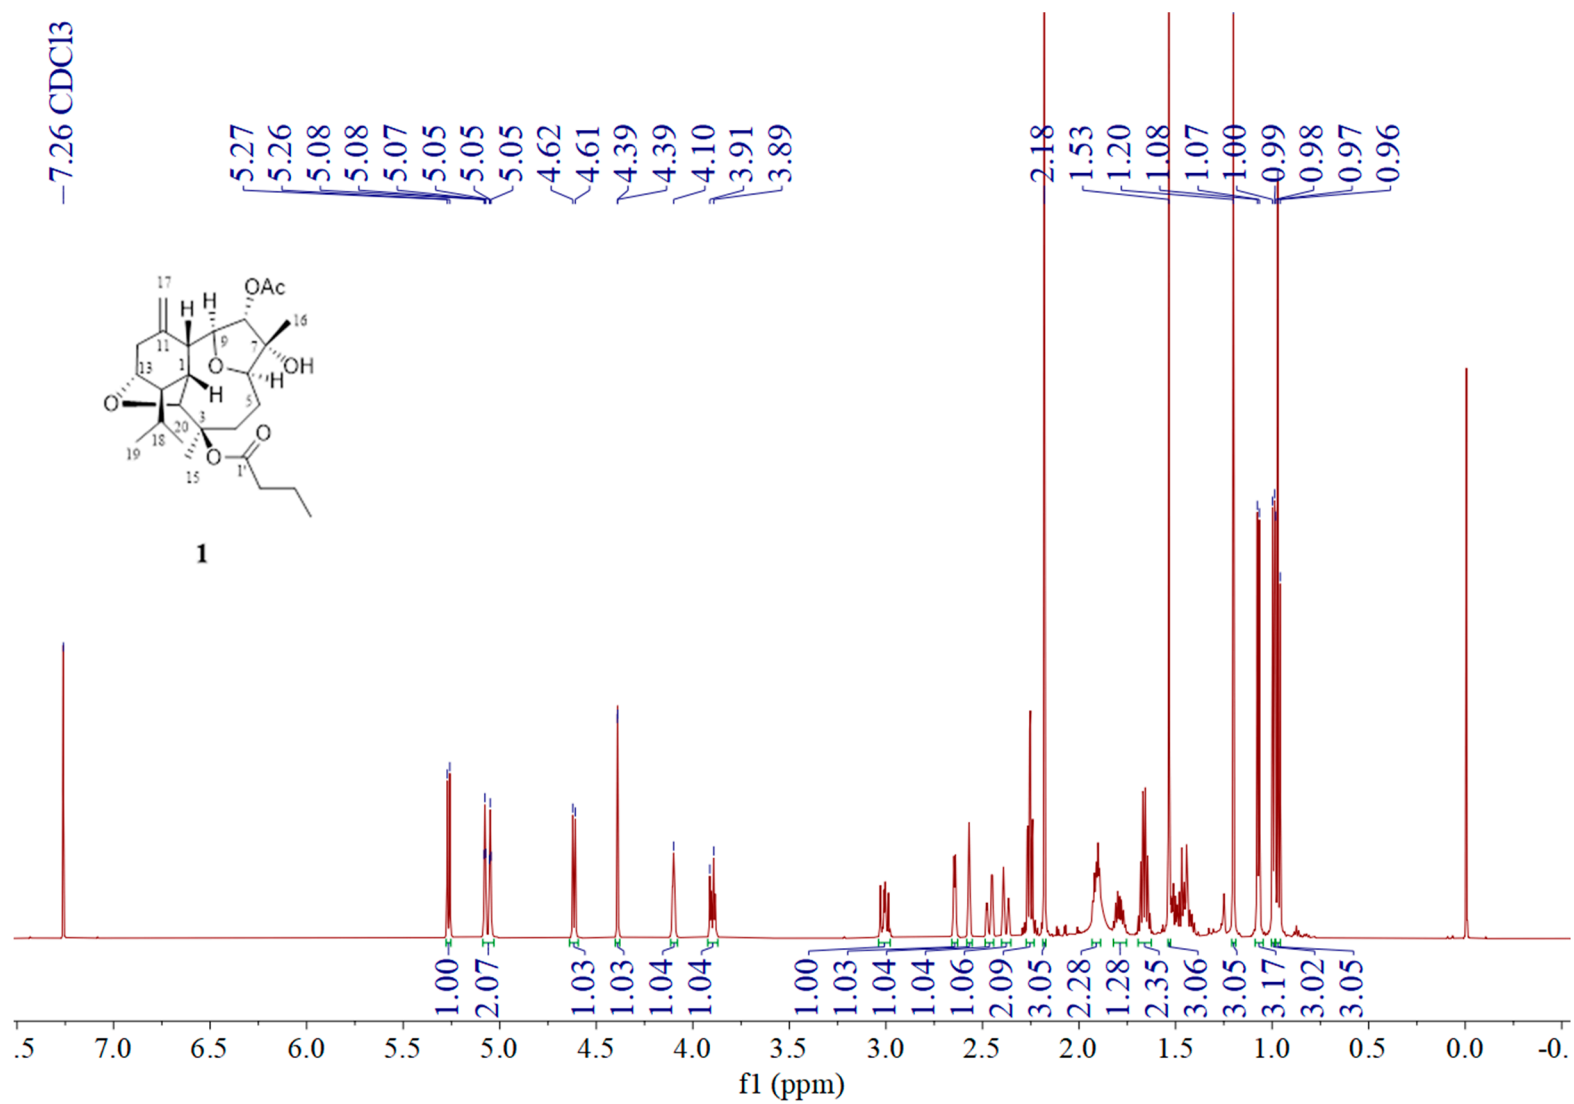

**Figure S1.** <sup>1</sup>H NMR spectrum of ximaornatin A (**1**) in CDCl<sub>3</sub>.

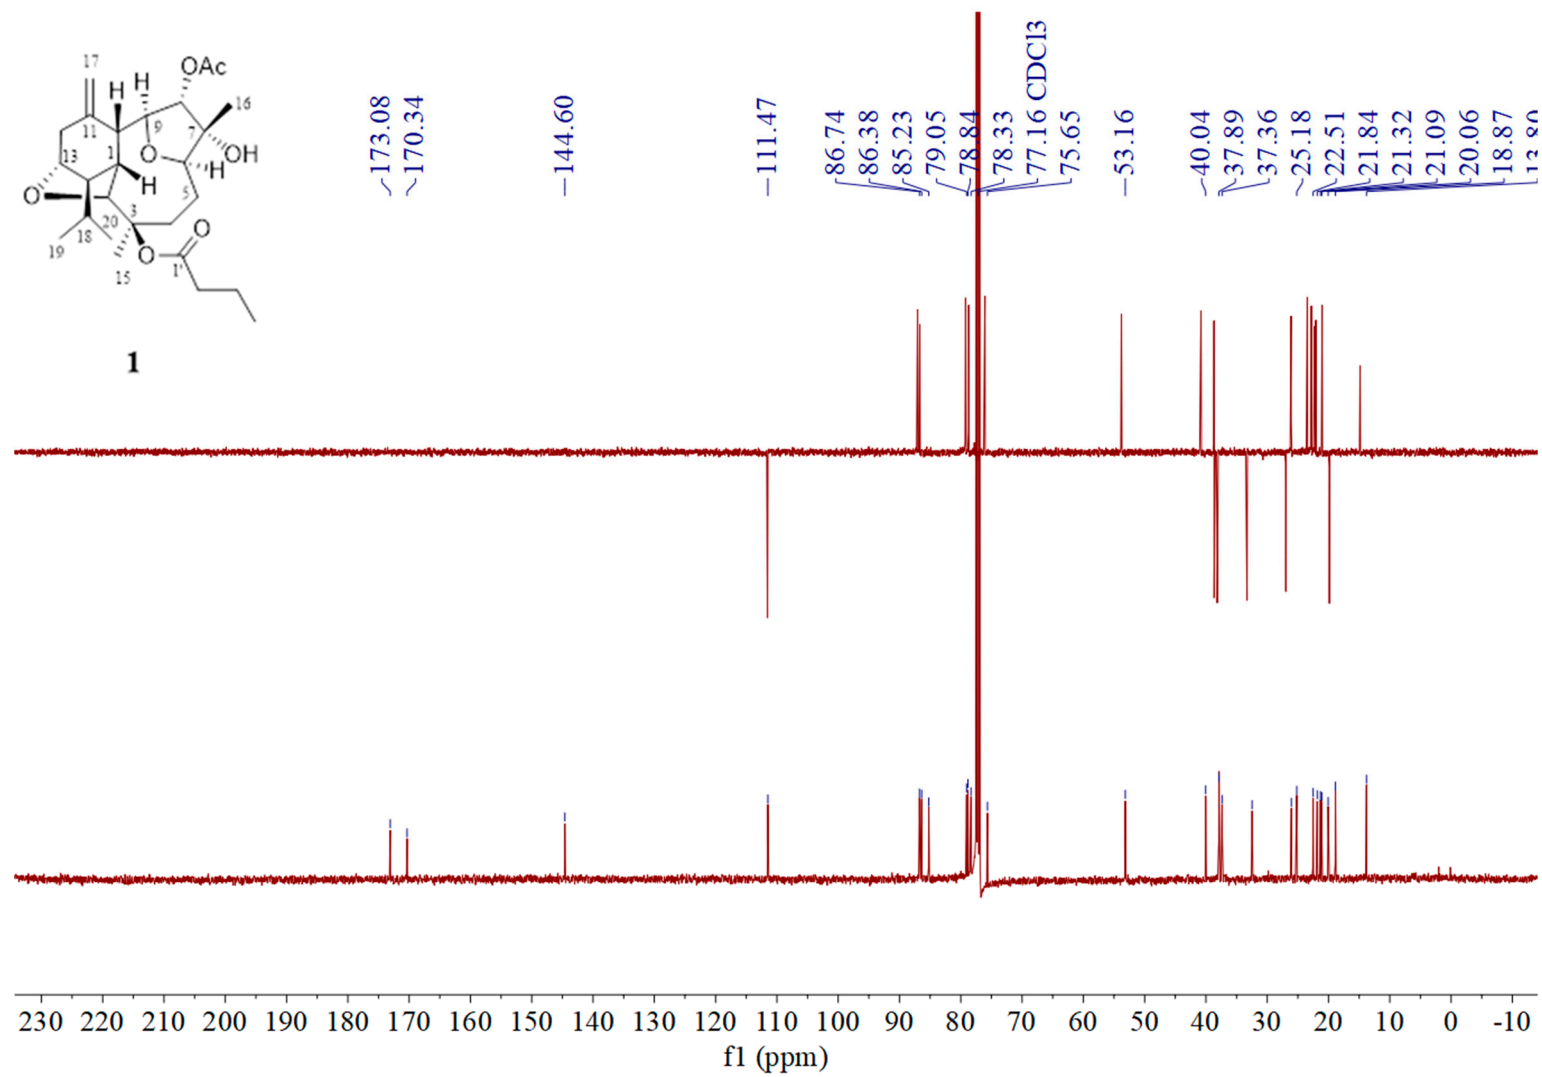

**Figure S2.** <sup>13</sup>C NMR spectrum of ximaornatin A (1) in CDCl<sub>3</sub>.

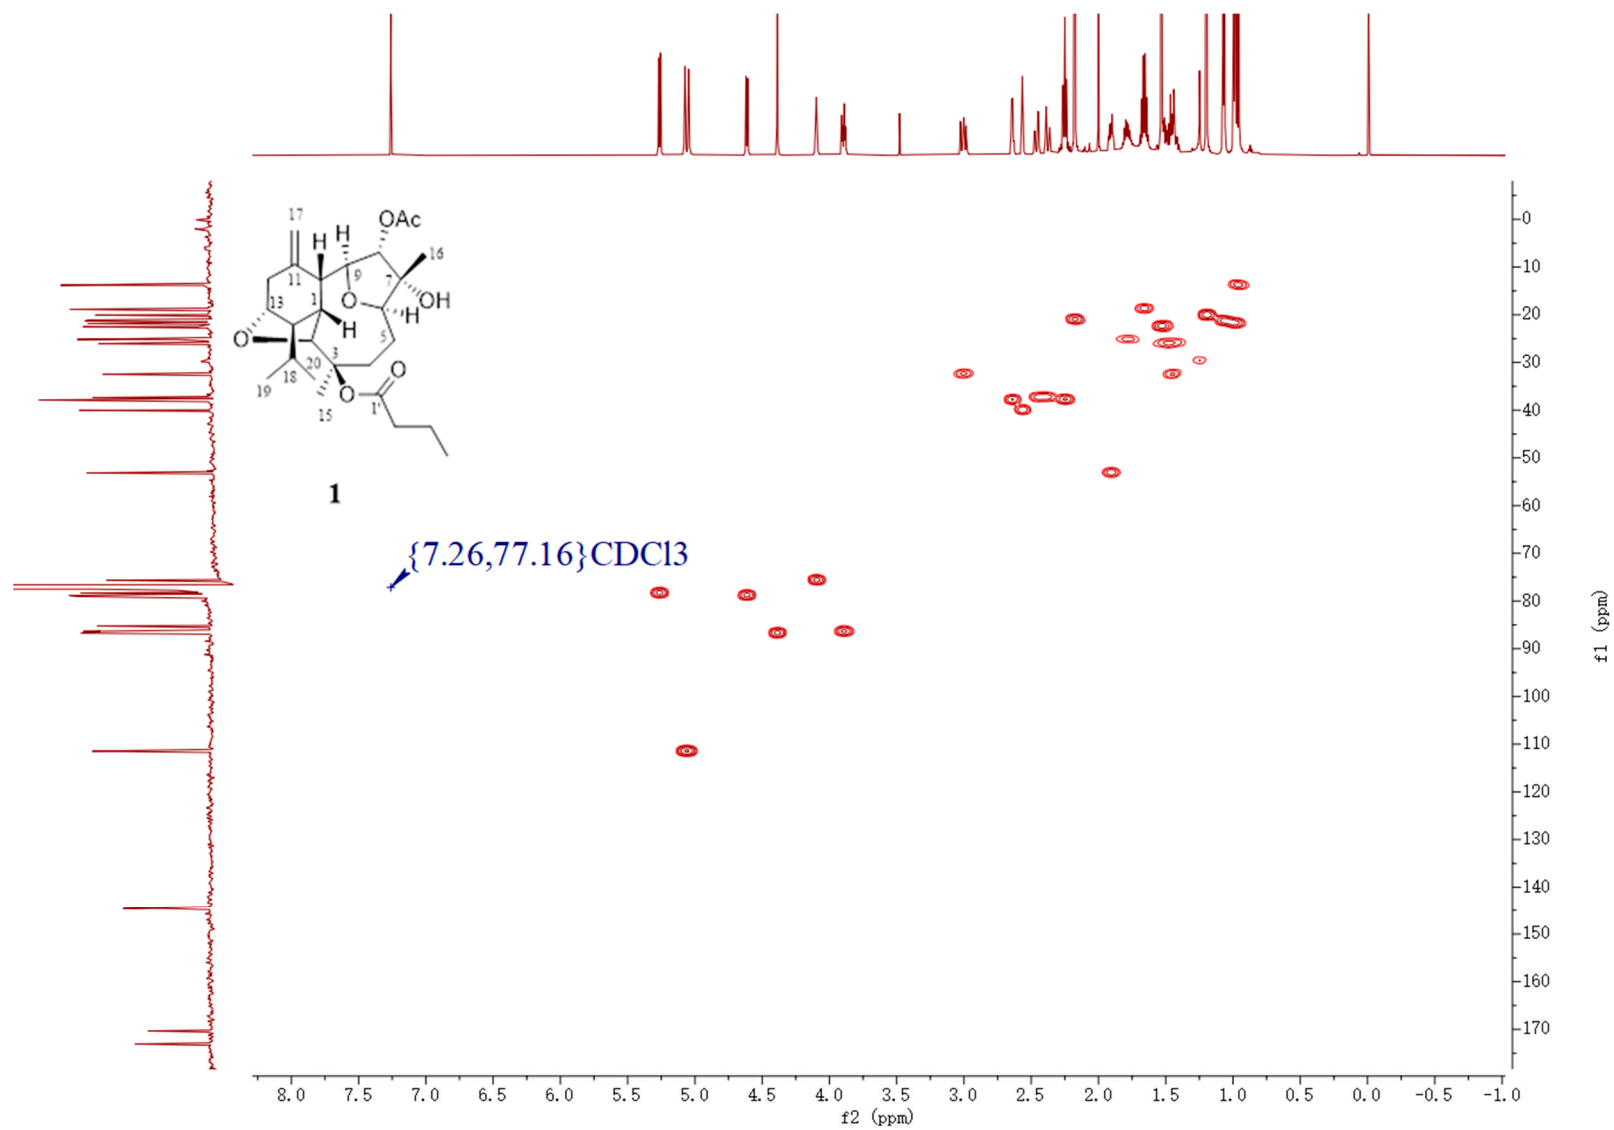

**Figure S3.** HSQC spectrum of ximaornatin A (**1**) in CDCl<sub>3</sub>.

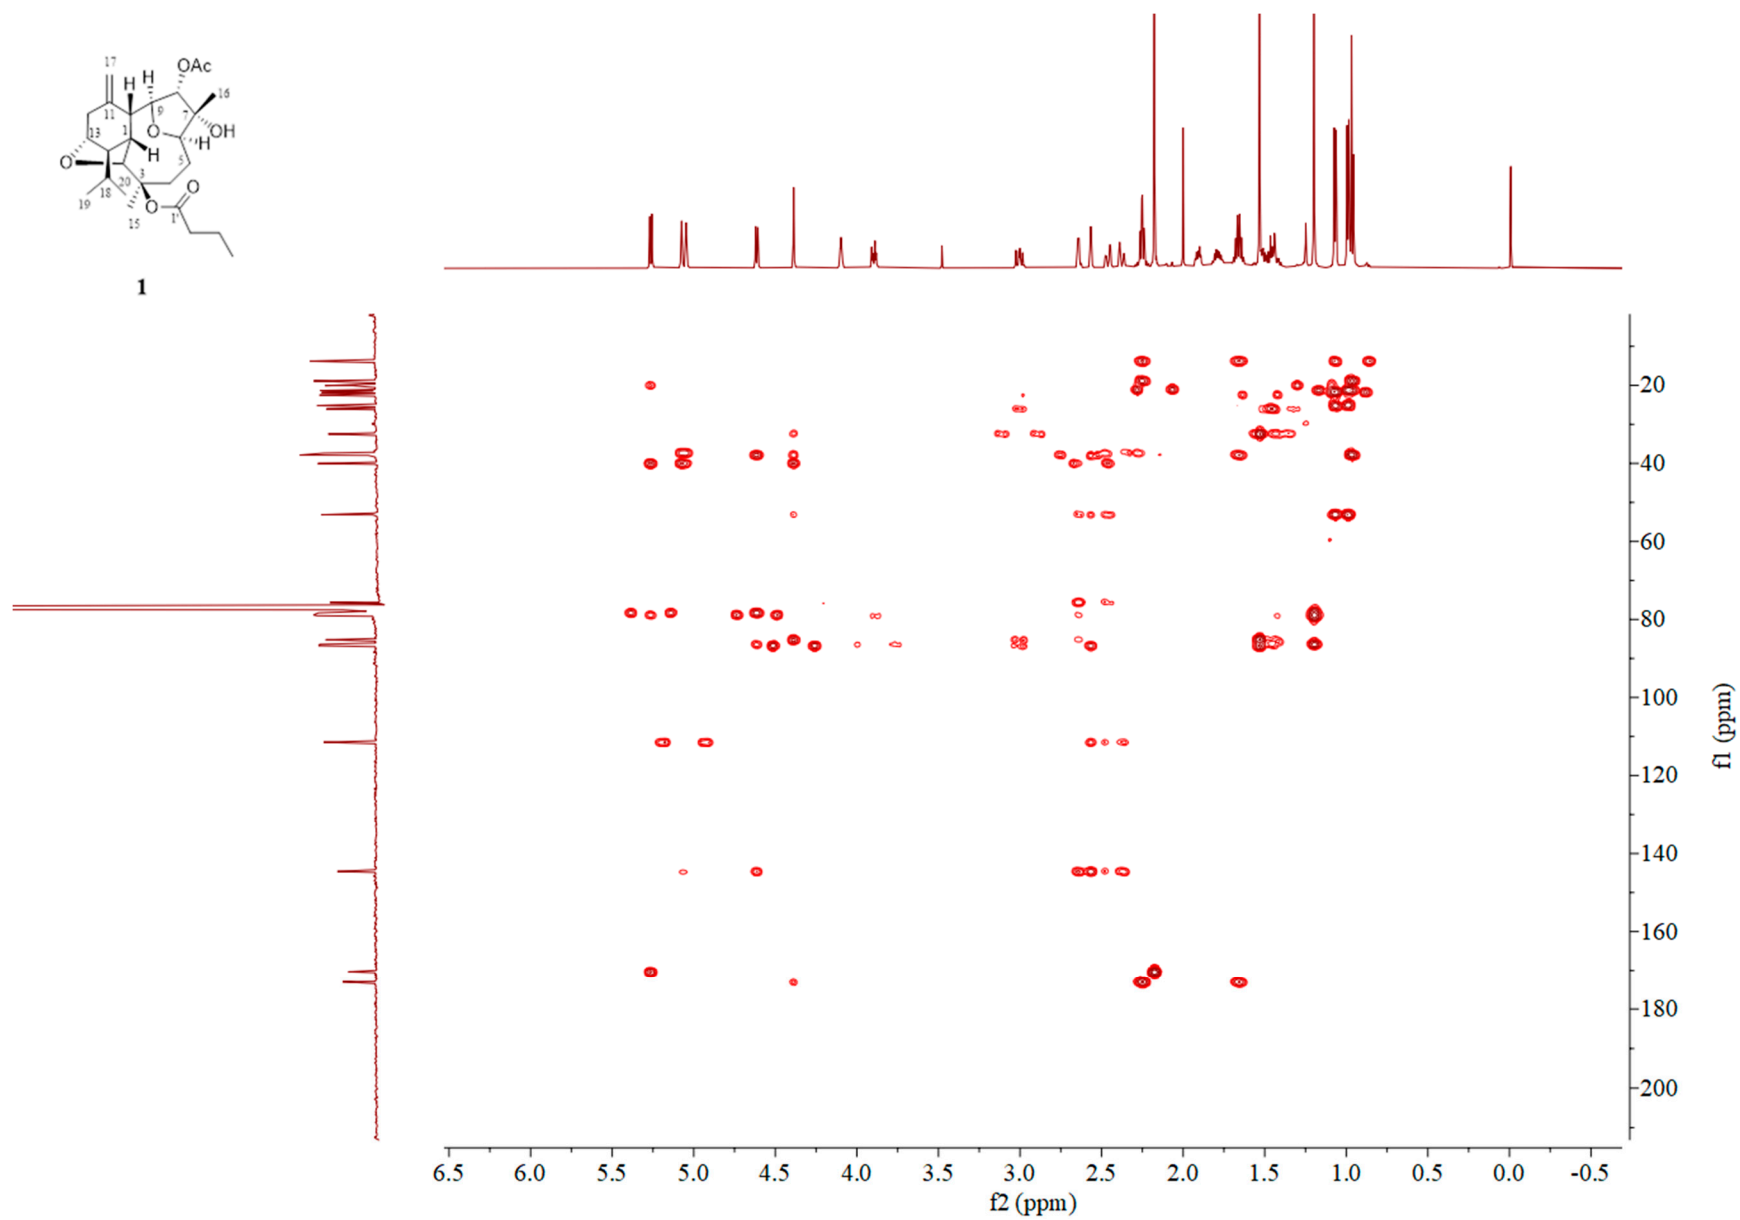

**Figure S4.** HMBC spectrum of ximaornatin A (1) in CDCl<sub>3</sub>.

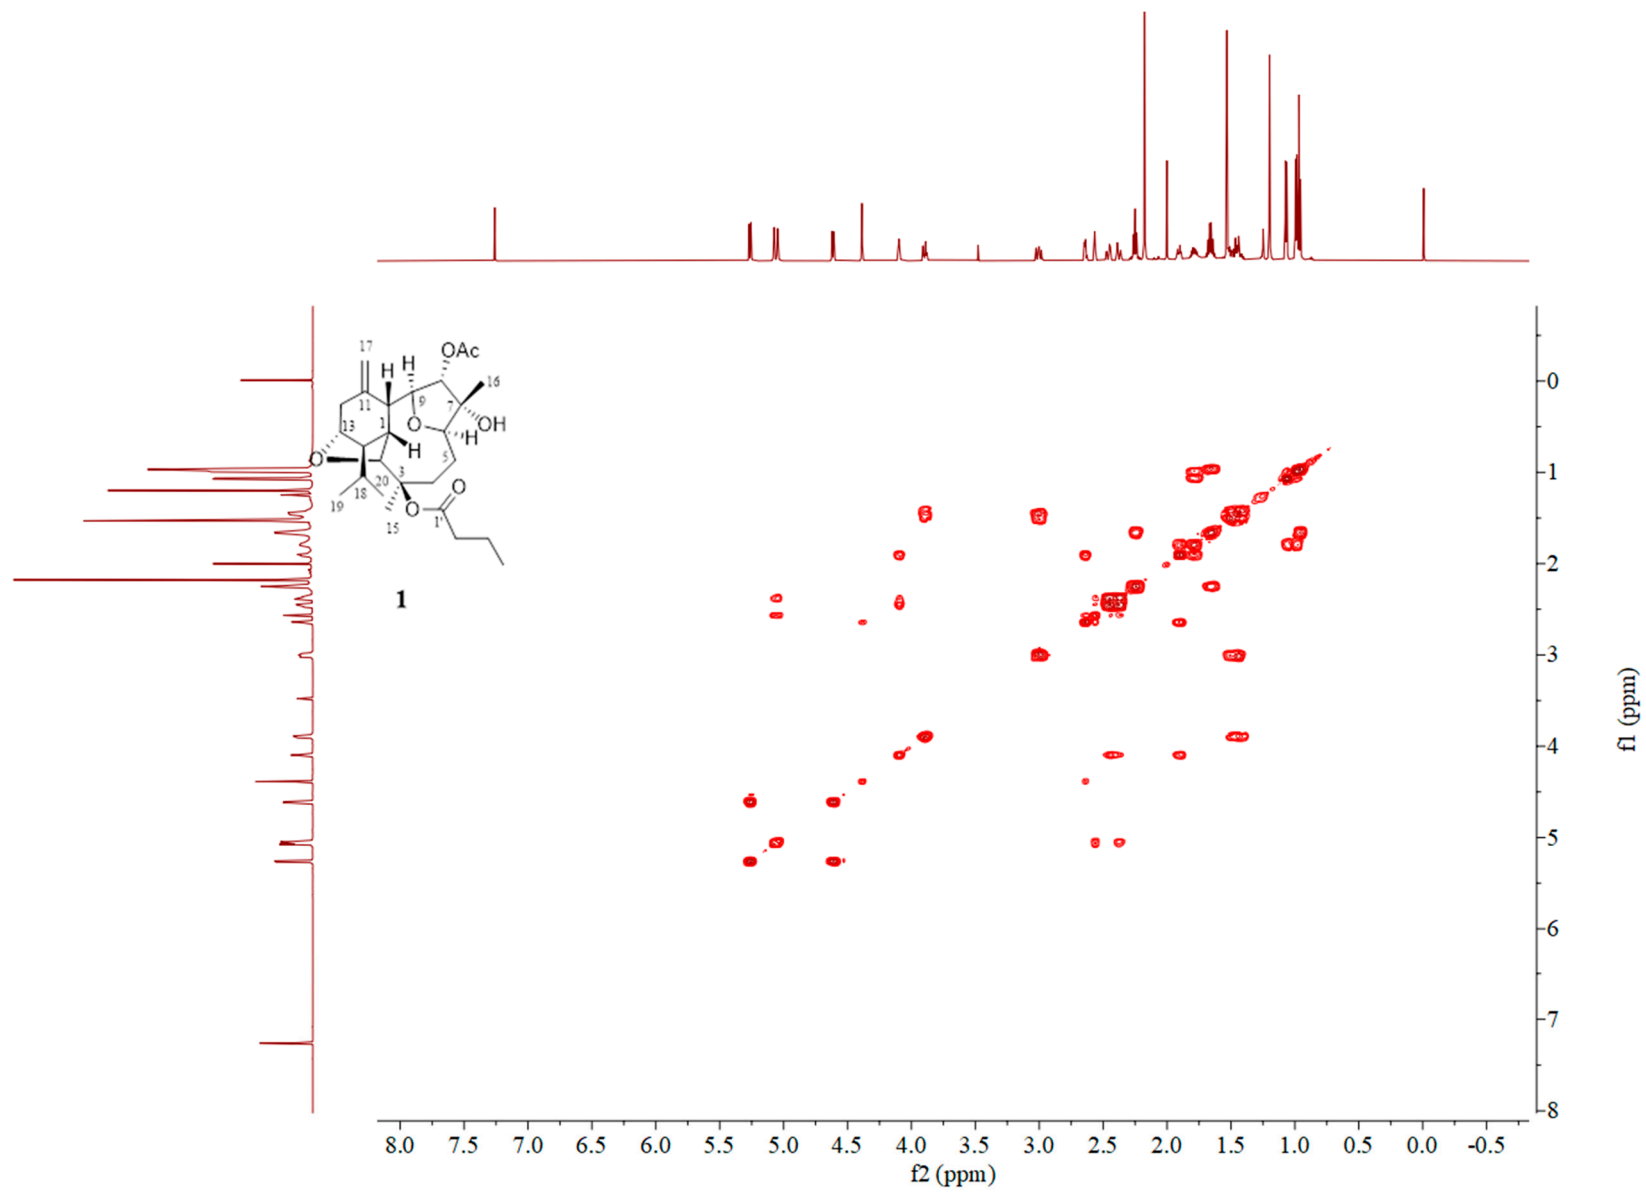

**Figure S5.**  $^1\text{H}$ - $^1\text{H}$  COSY spectrum of ximaornatin A (**1**) in  $\text{CDCl}_3$ .

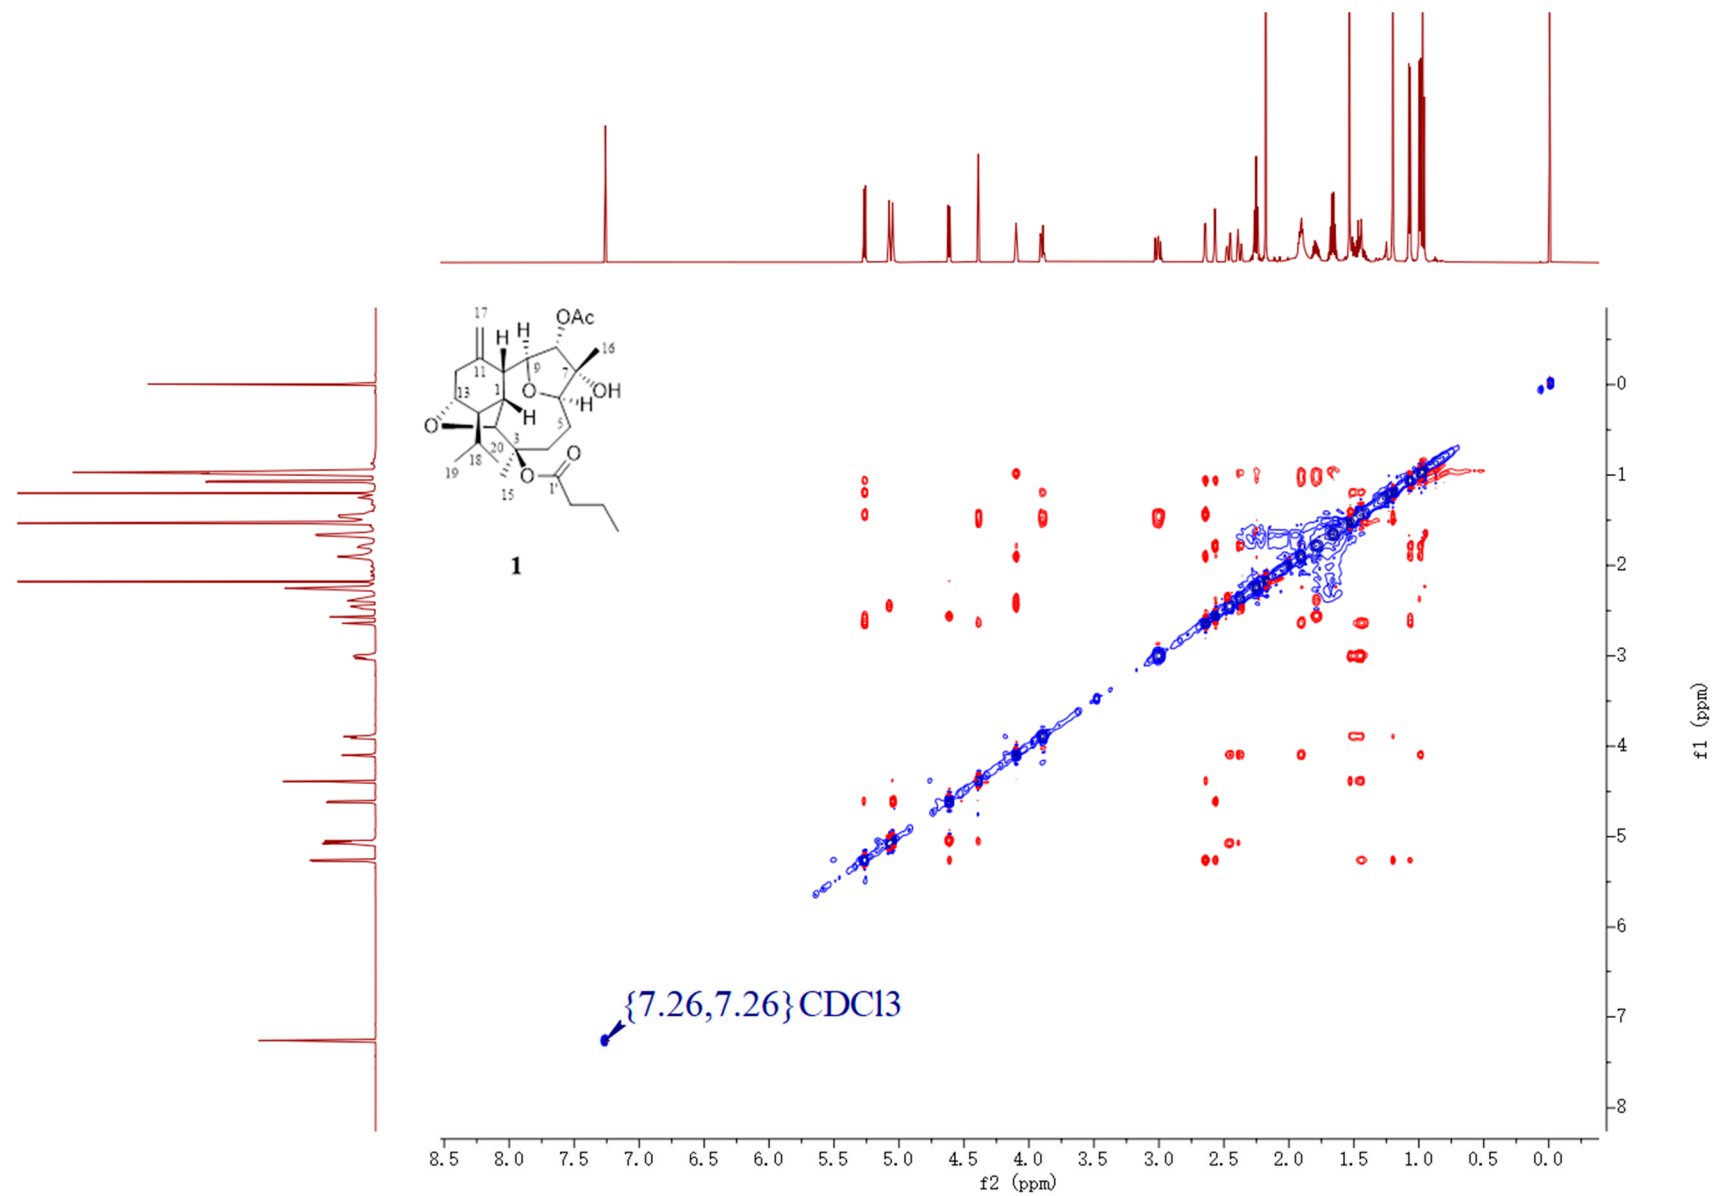

**Figure S6.** NOESY spectrum of ximaornatin A (**1**) in CDCl<sub>3</sub>.



## Qualitative Analysis Report

|                        |                                        |                               |                             |
|------------------------|----------------------------------------|-------------------------------|-----------------------------|
| <b>Data Filename</b>   | ESIH_20200526_GYW_SLL_04.d             | <b>Sample Name</b>            | A8-DBE-4                    |
| <b>Sample Type</b>     | Sample                                 | <b>Position</b>               | P1-D4                       |
| <b>Instrument Name</b> | Agilent G6520 Q-TOF                    | <b>Acq Method</b>             | 20160322_MS_ESIH_POS_1min.m |
| <b>Acquired Time</b>   | 5/26/2020 17:44:19                     | <b>IRM Calibration Status</b> | Success                     |
| <b>DA Method</b>       | small molecular data analysis method.m | <b>Comment</b>                | ESIH by ZZY                 |

### User Spectra

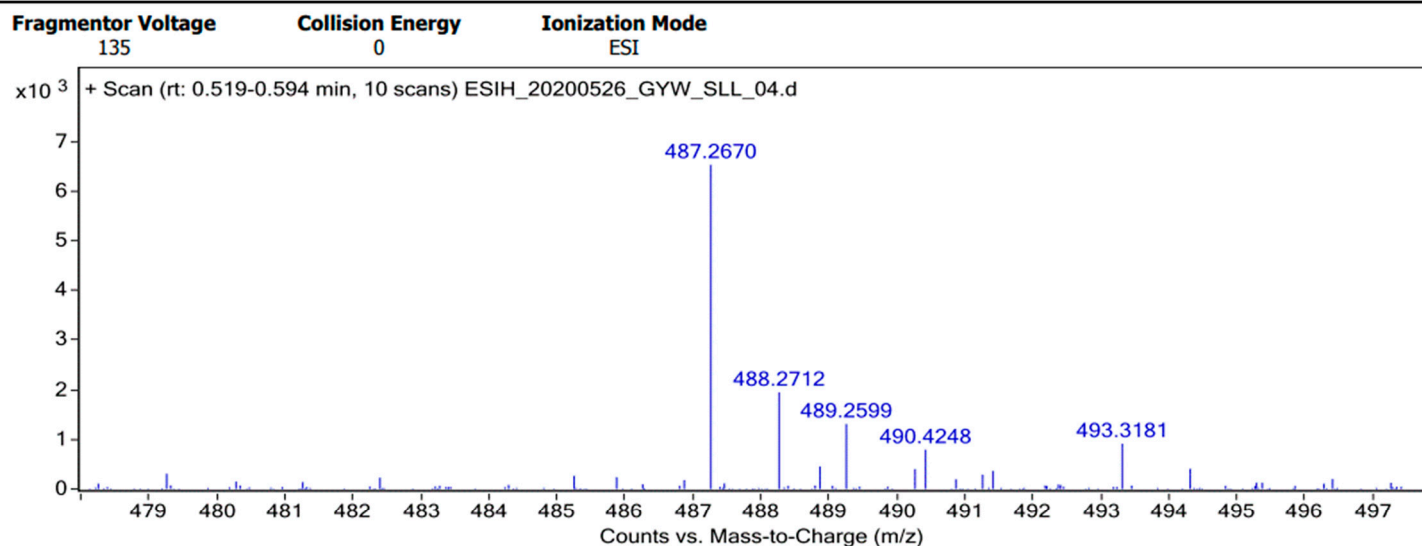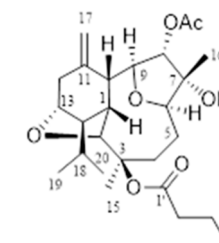

**1**

### Formula Calculator Results

| m/z     | Calc m/z | Diff (mDa) | Diff (ppm) | Ion Formula                                       | Ion                 |
|---------|----------|------------|------------|---------------------------------------------------|---------------------|
| 487.267 | 487.2666 | -0.39      | -0.79      | C <sub>26</sub> H <sub>40</sub> Na O <sub>7</sub> | (M+Na) <sup>+</sup> |

--- End Of Report ---

**Figure S7.** HRESIMS spectrum of ximaornatin A (**1**) in MeOH.

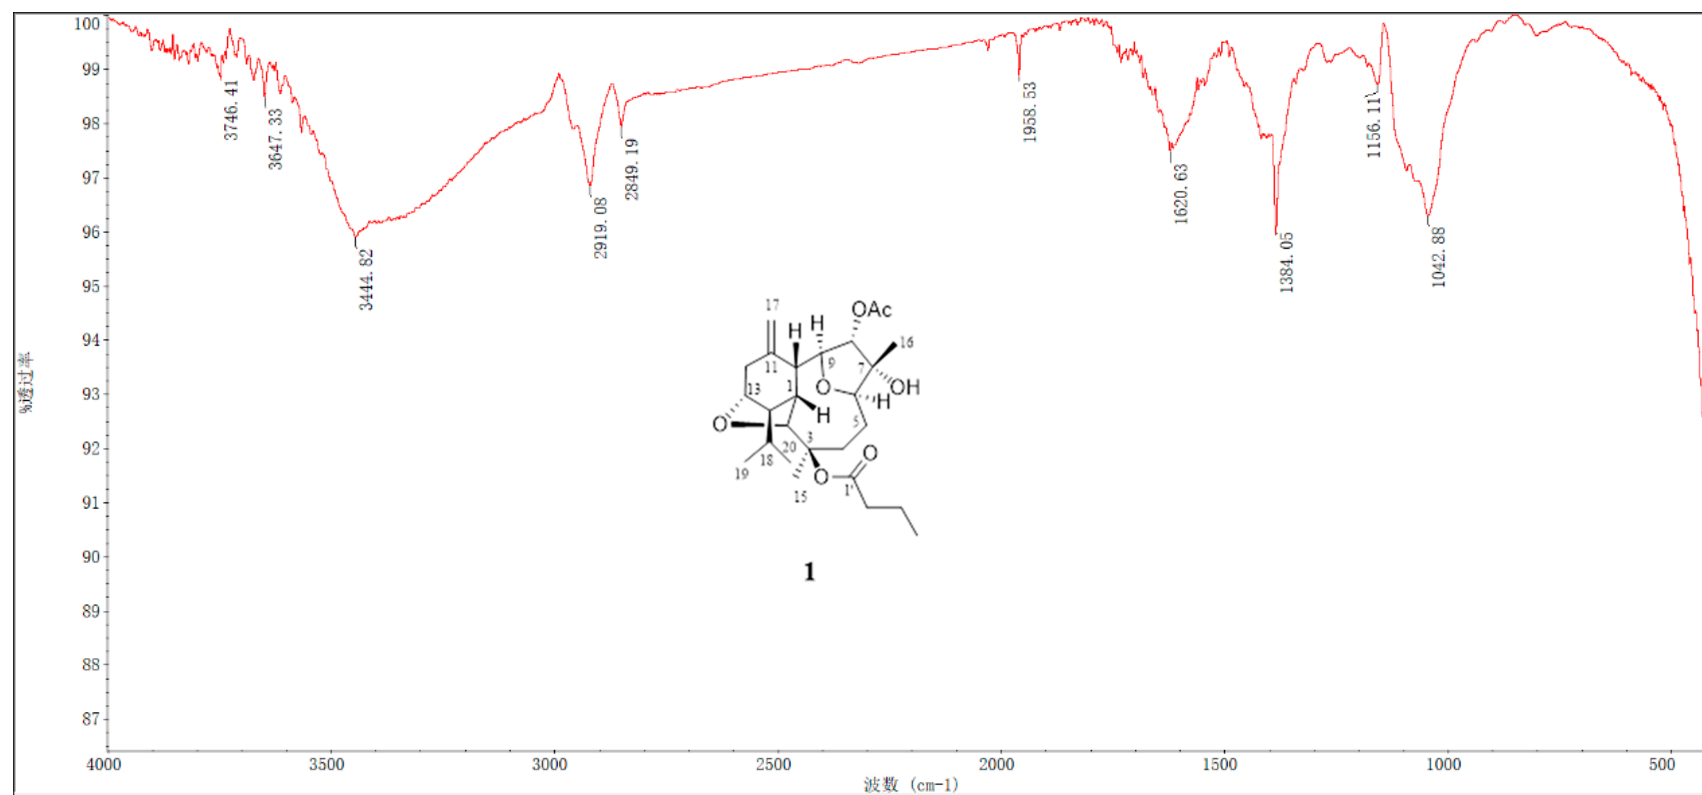

**Figure S8.** IR spectrum of ximaornatin A (**1**).

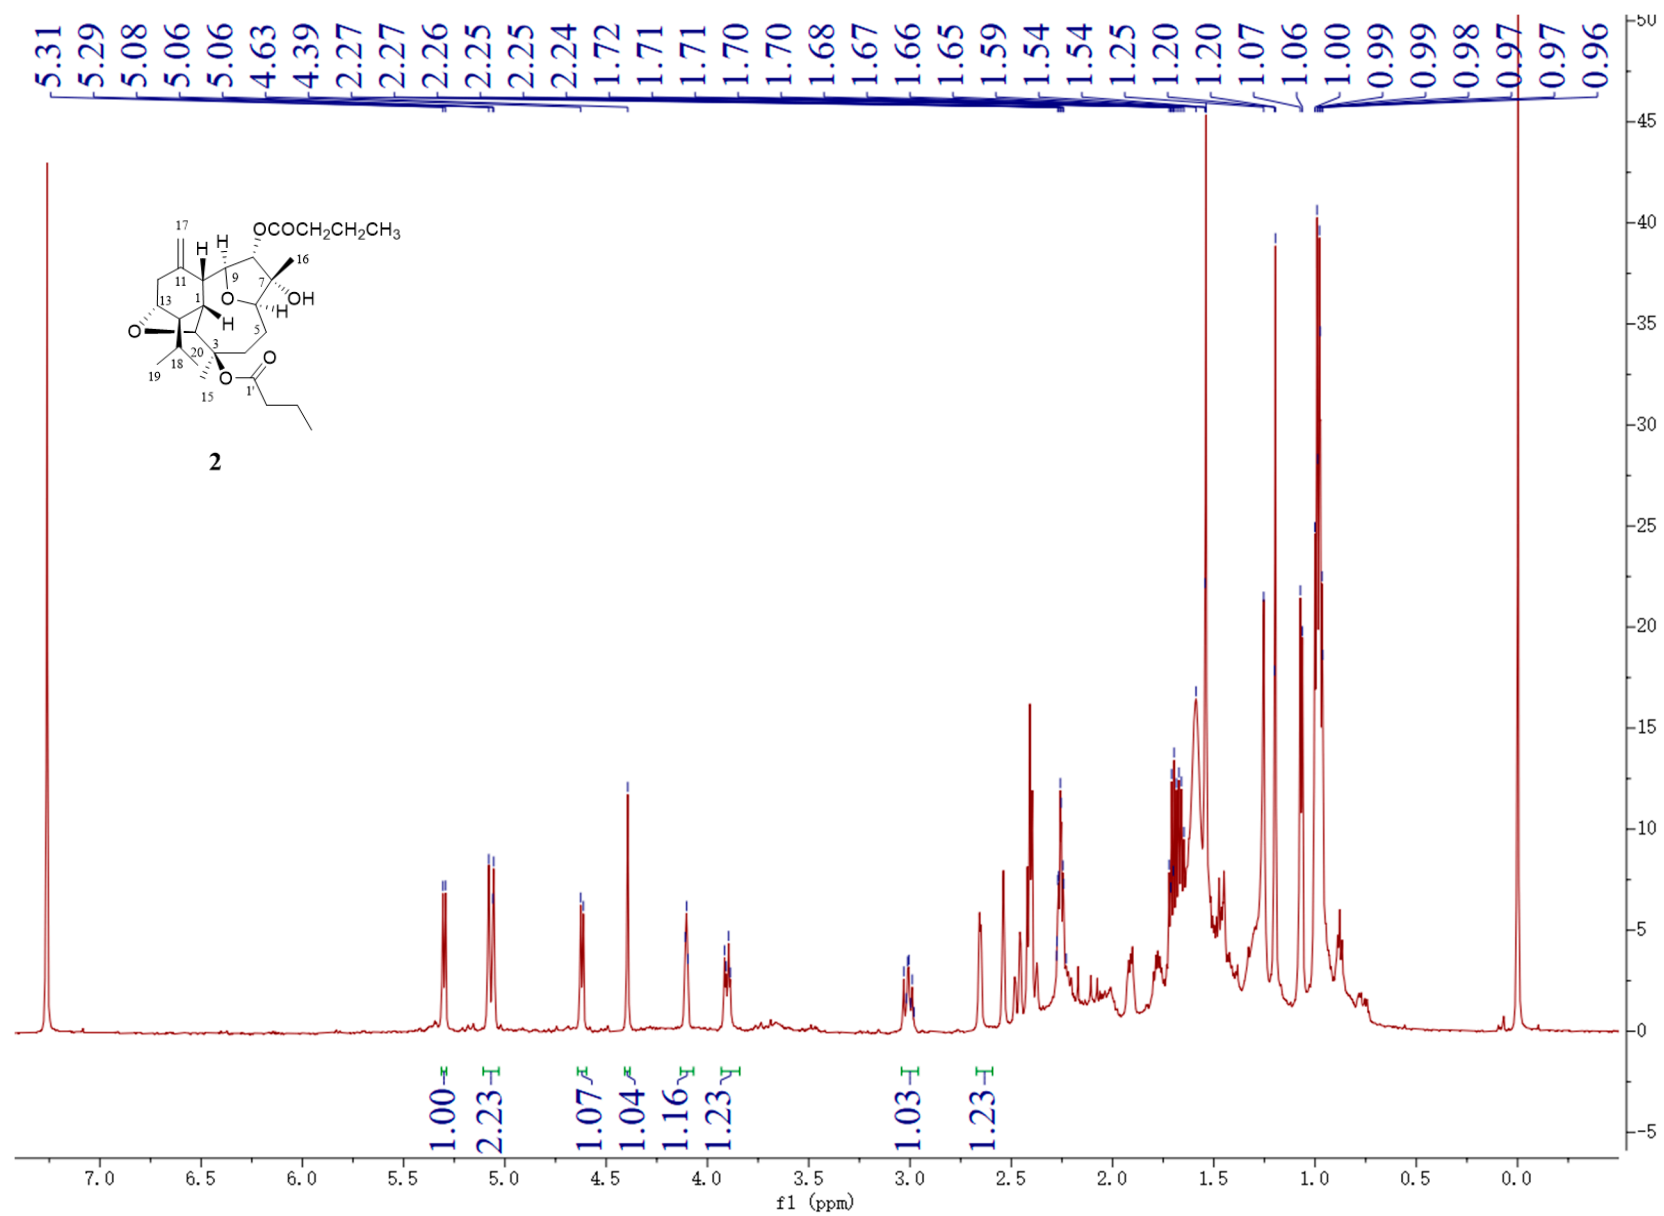

**Figure S9.**  $^1\text{H}$  NMR spectrum of ximaornatin B (**2**) in CDCl<sub>3</sub>.

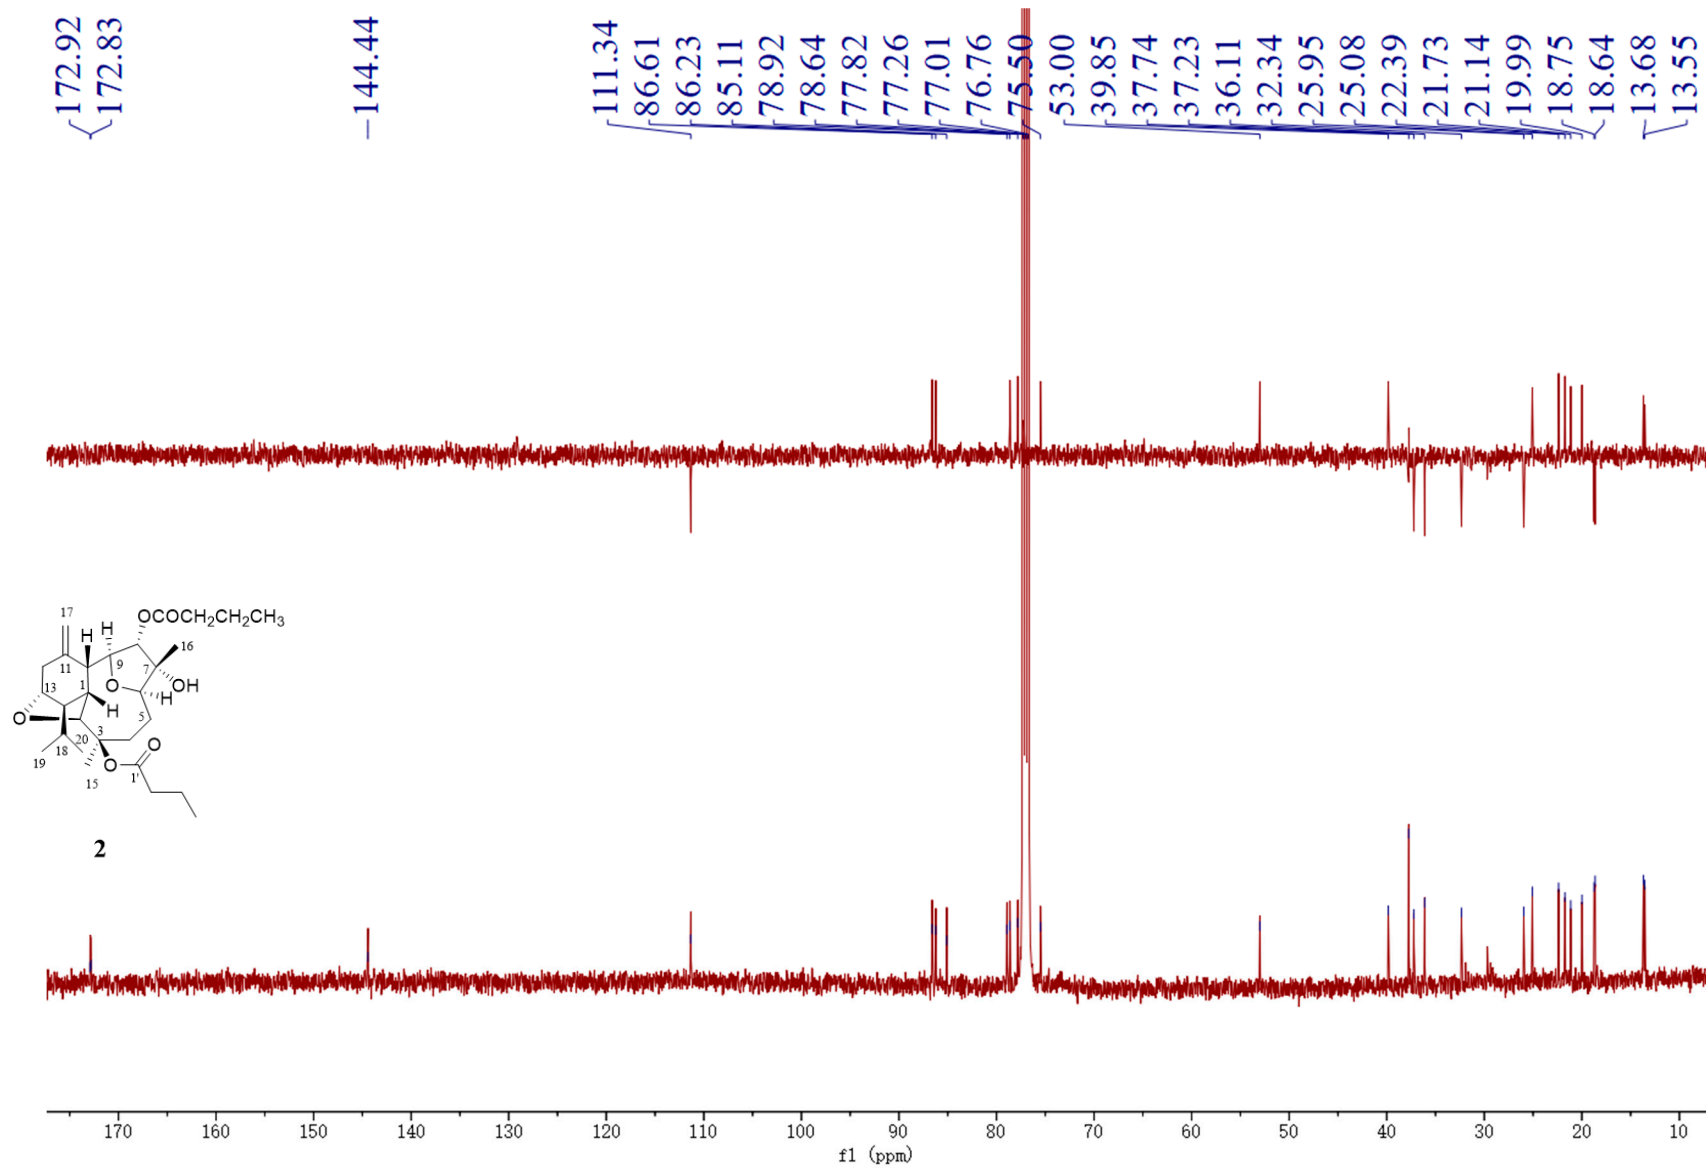

**Figure S10.** <sup>13</sup>C NMR spectrum of ximaornatin B (2) in CDCl<sub>3</sub>.

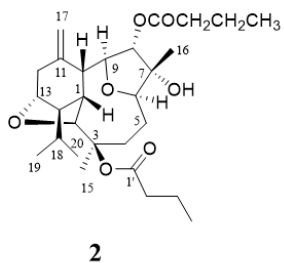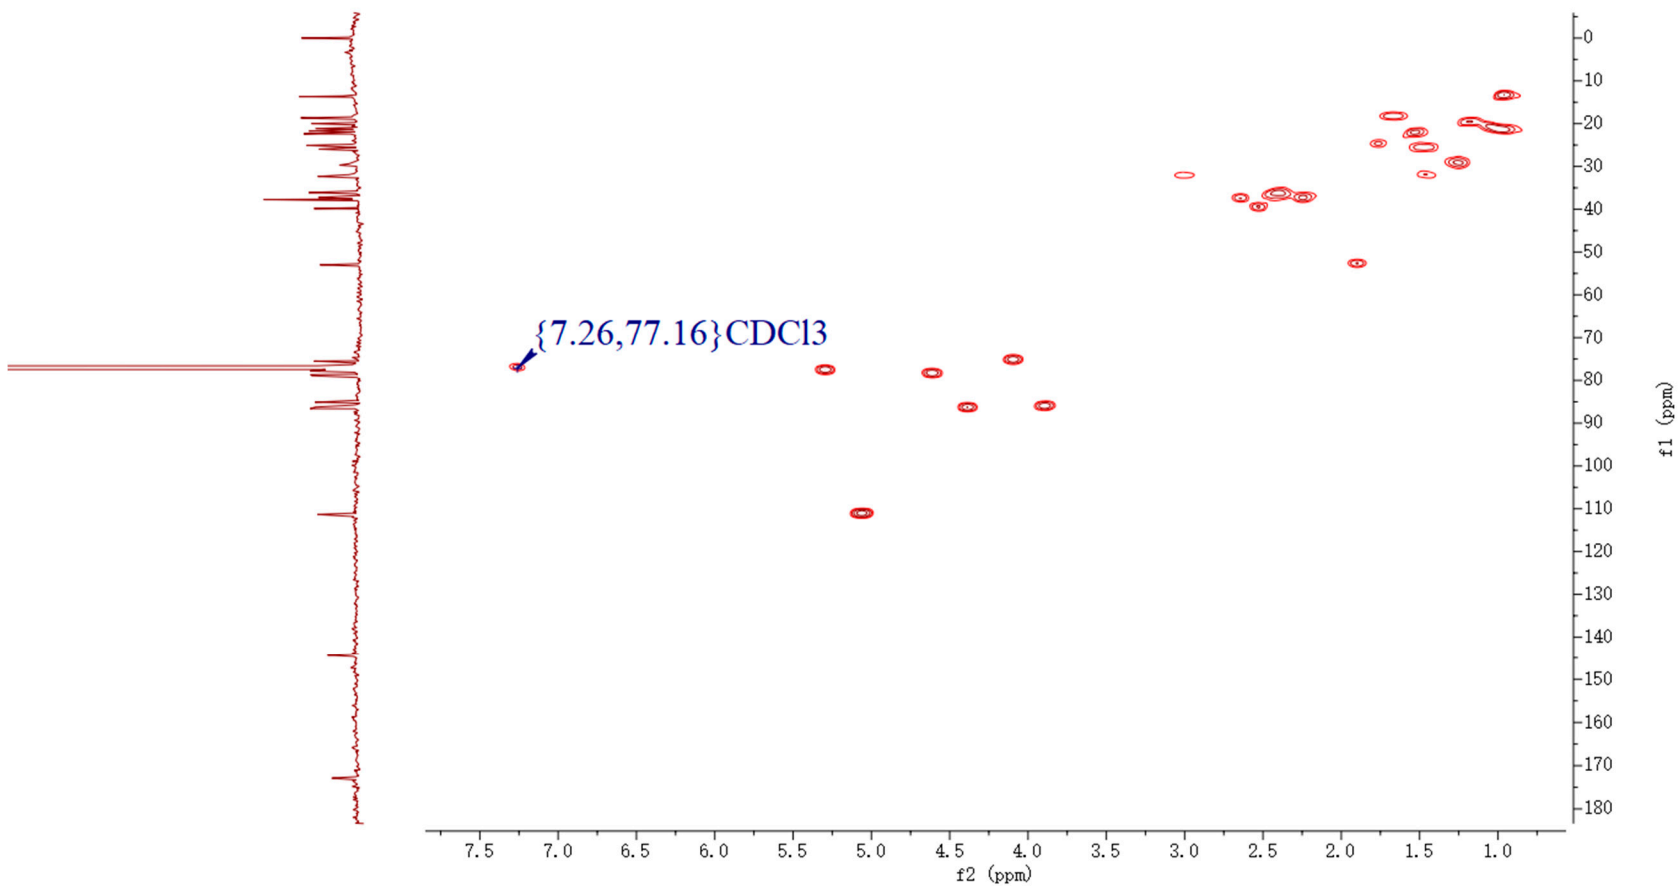

**Figure S11.** HSQC spectrum of ximaornatin B (**2**) in CDCl<sub>3</sub>.

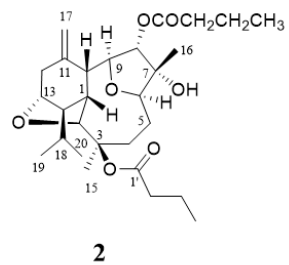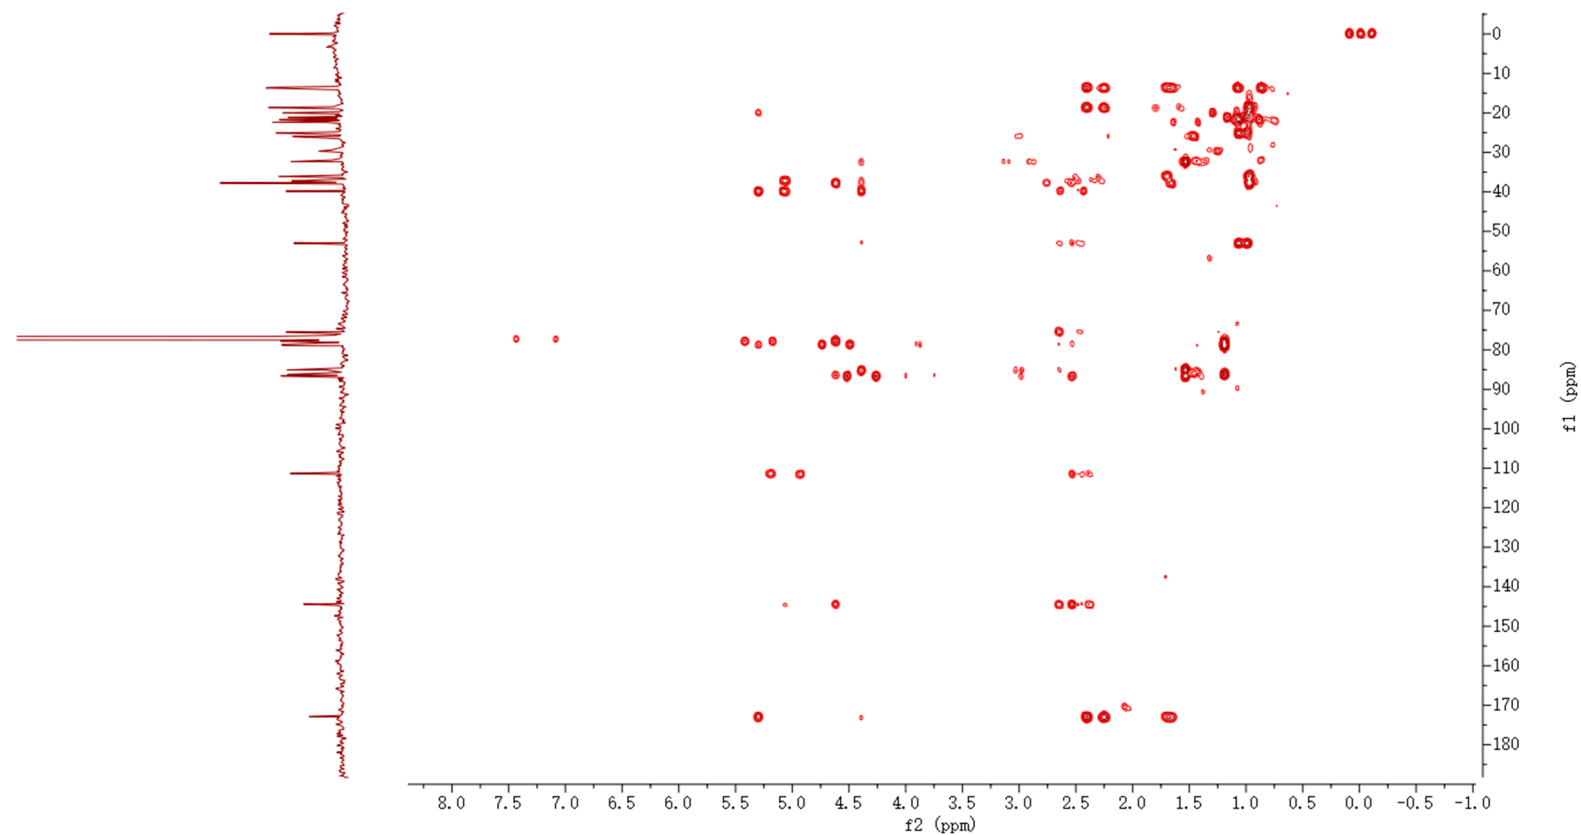

**Figure S12.** HMBC spectrum of ximaornatin B (2) in  $\text{CDCl}_3$ .

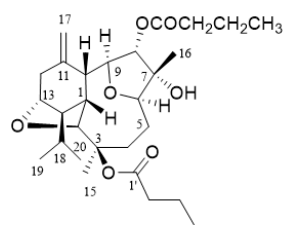

2

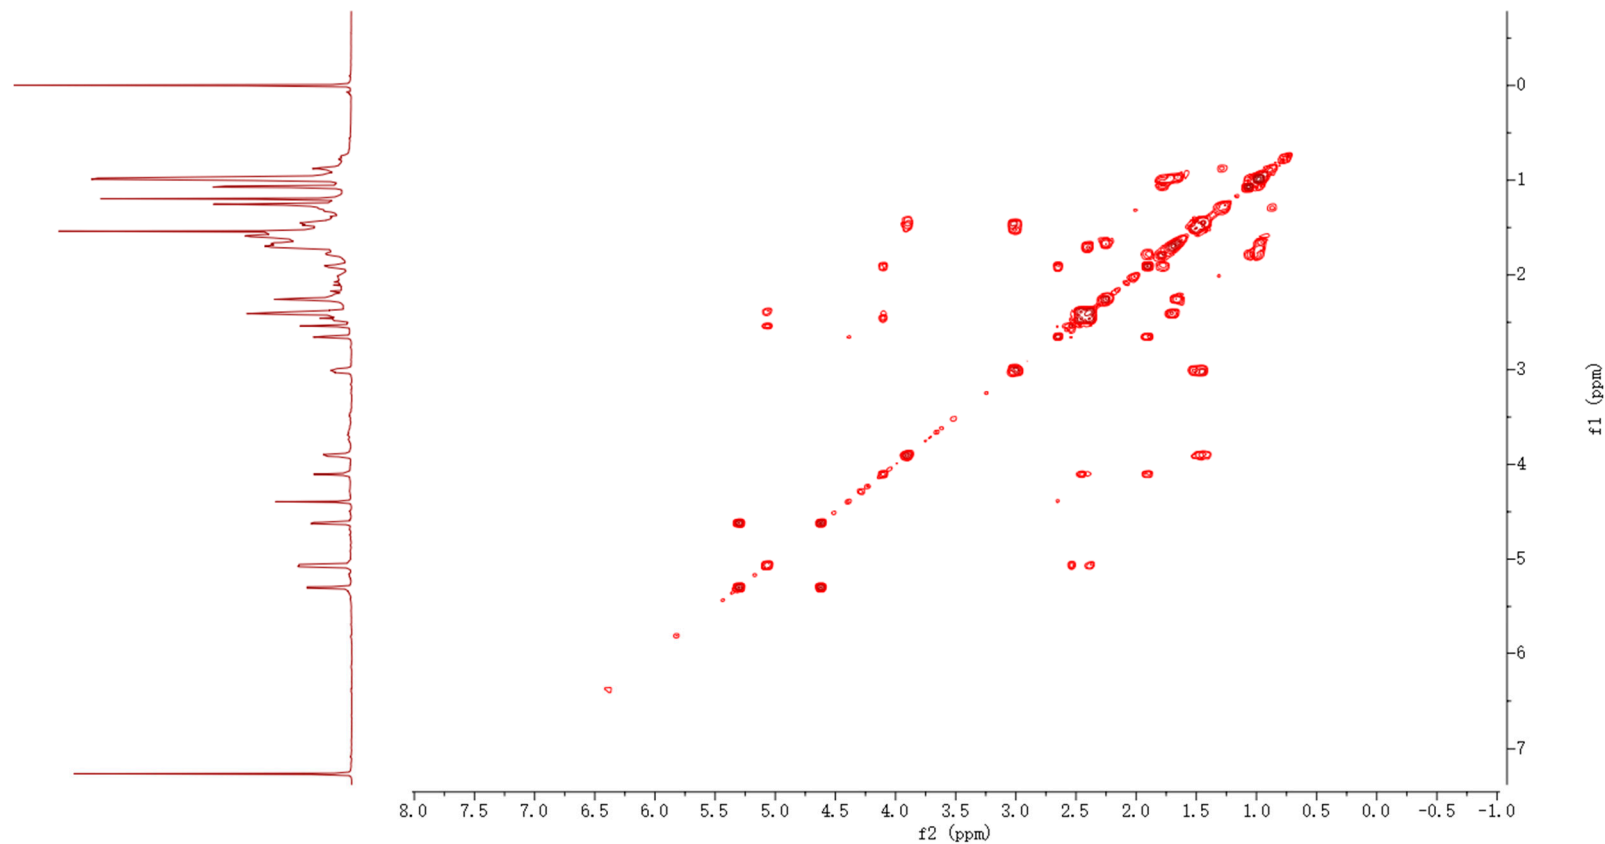

**Figure S13.**  $^1\text{H}$ - $^1\text{H}$  COSY spectrum of ximaornatin B (2) in  $\text{CDCl}_3$ .

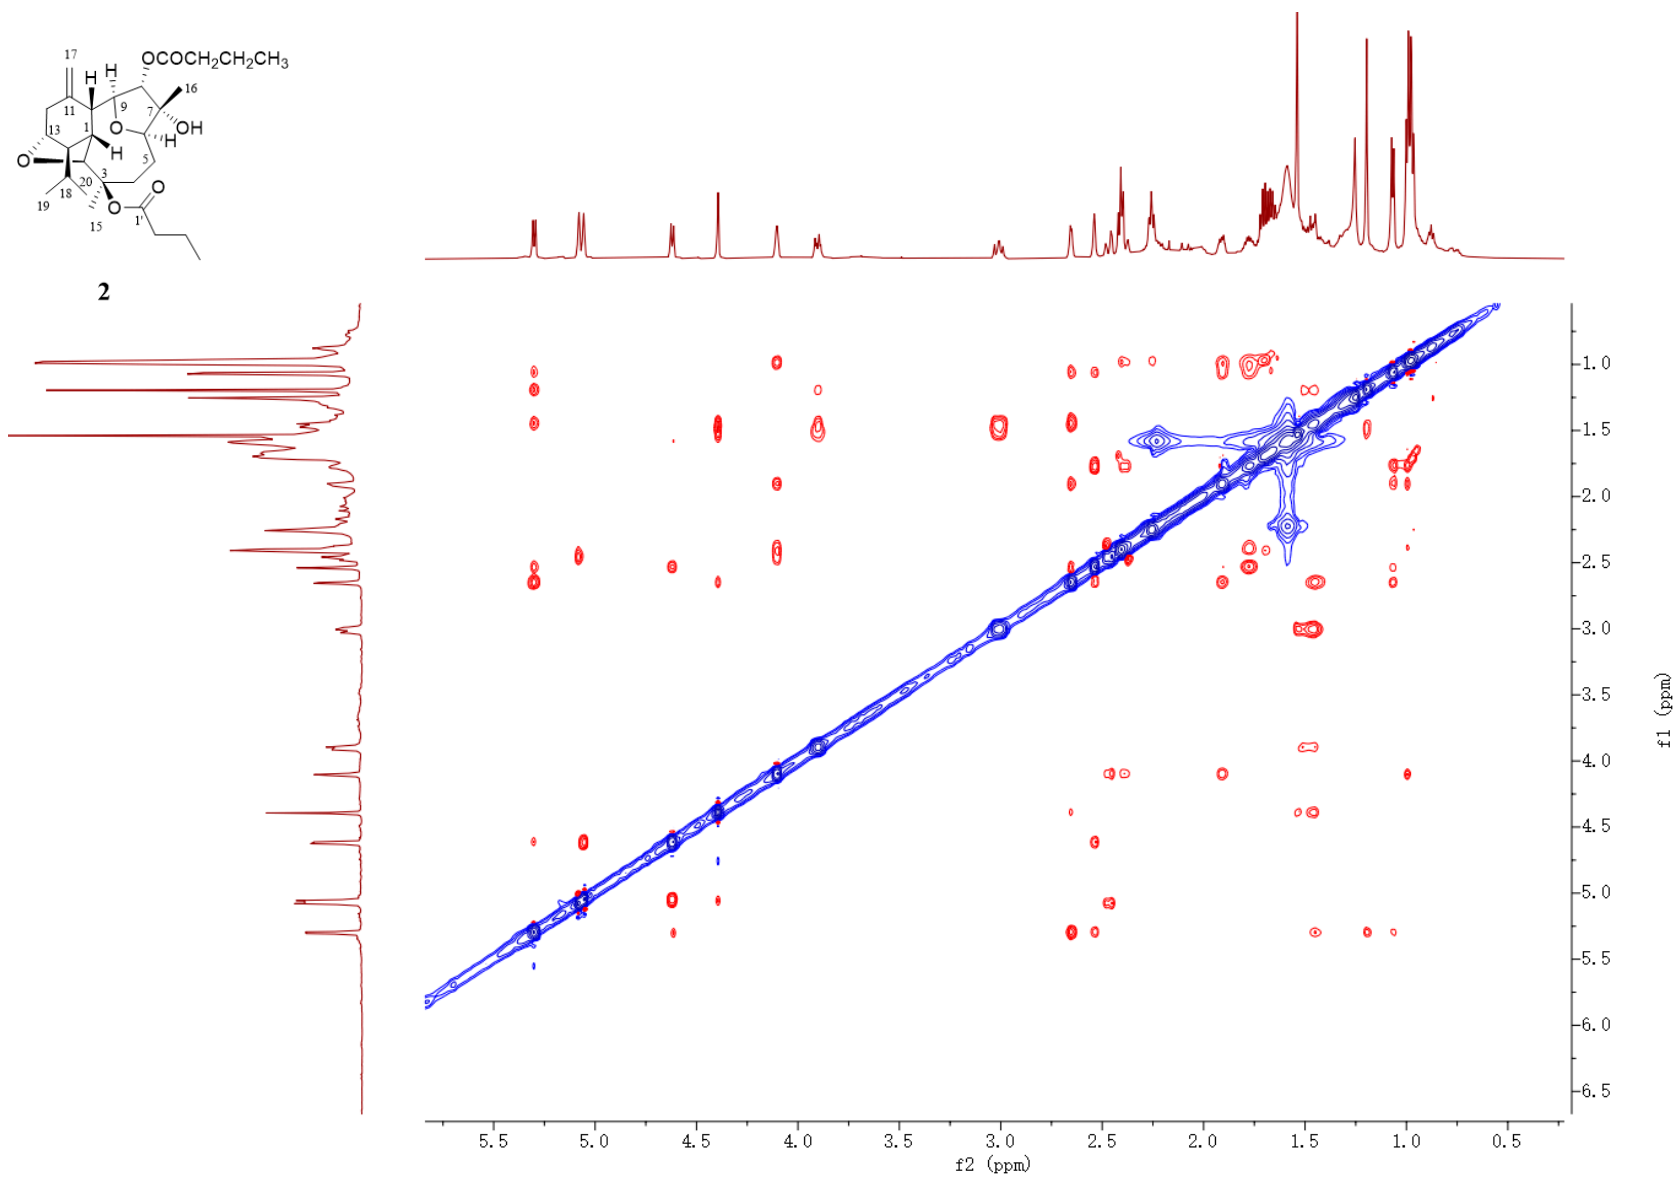

**Figure S14.** NOESY spectrum of ximaornatin B (**2**) in  $\text{CDCl}_3$ .



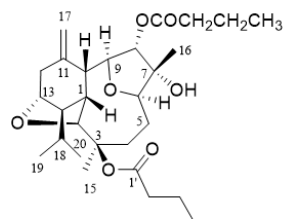

2

EIH-20200605-GYW-SLL-04\_A8-DBG-6 -c1

6/9/2020 3:02:21 PM

EIH-20200605-GYW-SLL-04\_A8-DBG-6 -c1#4 RT: 4.14

T: + c EI Full ms [ 49.50-800.50]

m/z= 48-803

| m/z      | Intensity | Relative | Theo. Mass | Delta (mmu) | RDB equiv. | Compositior                                    |
|----------|-----------|----------|------------|-------------|------------|------------------------------------------------|
| 258.1601 | 81614.0   | 1.13     | 258.1614   | -1.38       | 7.0        | C <sub>17</sub> H <sub>22</sub> O <sub>2</sub> |
| 259.1690 | 119677.0  | 1.65     | 259.1693   | -0.27       | 6.5        | C <sub>17</sub> H <sub>23</sub> O <sub>2</sub> |
| 260.1778 | 67539.0   | 0.93     | 260.1771   | 0.72        | 6.0        | C <sub>17</sub> H <sub>24</sub> O <sub>2</sub> |
| 261.1869 | 89138.0   | 1.23     | 261.1849   | 1.95        | 5.5        | C <sub>17</sub> H <sub>25</sub> O <sub>2</sub> |
| 262.1907 | 41028.0   | 0.57     | 262.1927   | -1.98       | 5.0        | C <sub>17</sub> H <sub>26</sub> O <sub>2</sub> |
| 263.1650 | 33283.0   | 0.46     | 263.1642   | 0.83        | 5.5        | C <sub>16</sub> H <sub>23</sub> O <sub>3</sub> |
| 269.1898 | 80950.0   | 1.12     | 269.1900   | -0.16       | 7.5        | C <sub>19</sub> H <sub>25</sub> O <sub>1</sub> |
| 270.1986 | 40276.0   | 0.56     | 270.1978   | 0.74        | 7.0        | C <sub>19</sub> H <sub>26</sub> O <sub>1</sub> |
| 271.2057 | 52889.0   | 0.73     | 271.2056   | 0.07        | 6.5        | C <sub>19</sub> H <sub>27</sub> O <sub>1</sub> |
| 273.1498 | 96175.0   | 1.33     | 273.1485   | 1.30        | 7.5        | C <sub>17</sub> H <sub>21</sub> O <sub>3</sub> |
| 273.1851 | 146454.0  | 2.02     | 273.1849   | 0.19        | 6.5        | C <sub>18</sub> H <sub>25</sub> O <sub>2</sub> |
| 275.1640 | 56829.0   | 0.79     | 275.1642   | -0.16       | 6.5        | C <sub>17</sub> H <sub>23</sub> O <sub>3</sub> |
| 277.1805 | 66610.0   | 0.92     | 277.1798   | 0.67        | 5.5        | C <sub>17</sub> H <sub>25</sub> O <sub>3</sub> |
| 282.0516 | 56342.0   | 0.78     | 282.0523   | -0.68       | 12.0       | C <sub>16</sub> H <sub>10</sub> O <sub>5</sub> |
| 283.1698 | 45188.0   | 0.62     | 283.1693   | 0.57        | 8.5        | C <sub>19</sub> H <sub>23</sub> O <sub>2</sub> |
| 287.1994 | 143267.0  | 1.98     | 287.2006   | -1.13       | 6.5        | C <sub>19</sub> H <sub>27</sub> O <sub>2</sub> |
| 288.2063 | 76613.0   | 1.06     | 288.2084   | -2.05       | 6.0        | C <sub>19</sub> H <sub>28</sub> O <sub>2</sub> |
| 289.2164 | 39700.0   | 0.55     | 289.2162   | 0.15        | 5.5        | C <sub>19</sub> H <sub>29</sub> O <sub>2</sub> |
| 297.1848 | 87589.0   | 1.21     | 297.1849   | -0.15       | 8.5        | C <sub>20</sub> H <sub>25</sub> O <sub>2</sub> |
| 298.1914 | 72098.0   | 1.00     | 298.1927   | -1.30       | 8.0        | C <sub>20</sub> H <sub>26</sub> O <sub>2</sub> |
| 299.2004 | 94006.0   | 1.30     | 299.2006   | -0.14       | 7.5        | C <sub>20</sub> H <sub>27</sub> O <sub>2</sub> |
| 300.2076 | 106266.0  | 1.47     | 300.2084   | -0.82       | 7.0        | C <sub>20</sub> H <sub>28</sub> O <sub>2</sub> |
| 301.1818 | 56829.0   | 0.79     | 301.1798   | 1.98        | 7.5        | C <sub>19</sub> H <sub>25</sub> O <sub>3</sub> |
| 301.2154 | 54394.0   | 0.75     | 301.2162   | -0.82       | 6.5        | C <sub>20</sub> H <sub>29</sub> O <sub>2</sub> |
| 302.2222 | 33814.0   | 0.47     | 302.2240   | -1.79       | 6.0        | C <sub>20</sub> H <sub>30</sub> O <sub>2</sub> |
| 305.2132 | 44967.0   | 0.62     | 305.2111   | 2.10        | 5.5        | C <sub>19</sub> H <sub>29</sub> O <sub>3</sub> |
| 315.1955 | 497918.0  | 6.88     | 315.1955   | 0.04        | 7.5        | C <sub>20</sub> H <sub>27</sub> O <sub>3</sub> |
| 316.2015 | 517481.0  | 7.15     | 316.2033   | -1.79       | 7.0        | C <sub>20</sub> H <sub>28</sub> O <sub>3</sub> |
| 317.2096 | 209966.0  | 2.90     | 317.2111   | -1.53       | 6.5        | C <sub>20</sub> H <sub>29</sub> O <sub>3</sub> |
| 318.2185 | 84402.0   | 1.17     | 318.2189   | -0.42       | 6.0        | C <sub>20</sub> H <sub>30</sub> O <sub>3</sub> |
| 319.2253 | 45587.0   | 0.63     | 319.2268   | -1.50       | 5.5        | C <sub>20</sub> H <sub>31</sub> O <sub>3</sub> |
| 333.2065 | 244356.0  | 3.38     | 333.2060   | 0.51        | 6.5        | C <sub>20</sub> H <sub>29</sub> O <sub>4</sub> |
| 334.2114 | 102637.0  | 1.42     | 334.2139   | -2.51       | 6.0        | C <sub>20</sub> H <sub>30</sub> O <sub>4</sub> |
| 342.0154 | 37399.0   | 0.52     | 342.0159   | -0.48       | 18.0       | C <sub>20</sub> H <sub>6</sub> O <sub>6</sub>  |
| 369.1252 | 36425.0   | 0.50     | 369.1274   | -2.17       | 20.5       | C <sub>28</sub> H <sub>17</sub> O <sub>1</sub> |
| 404.2558 | 2630425.0 | 36.35    | 404.2557   | 0.07        | 7.0        | C <sub>24</sub> H <sub>36</sub> O <sub>5</sub> |
| 421.2605 | 219925.0  | 3.04     | 421.2585   | 2.03        | 6.5        | C <sub>24</sub> H <sub>37</sub> O <sub>6</sub> |
| 422.2669 | 92989.0   | 1.29     | 422.2663   | 0.62        | 6.0        | C <sub>24</sub> H <sub>38</sub> O <sub>6</sub> |
| 431.0887 | 35097.0   | 0.49     | 431.0914   | -2.71       | 21.5       | C <sub>28</sub> H <sub>15</sub> O <sub>5</sub> |
| 492.3080 | 39700.0   | 0.55     | 492.3082   | -0.14       | 7.0        | C <sub>28</sub> H <sub>44</sub> O <sub>7</sub> |

Figure S15. HREIMS spectrum of ximaornatin B (2) in MeOH.

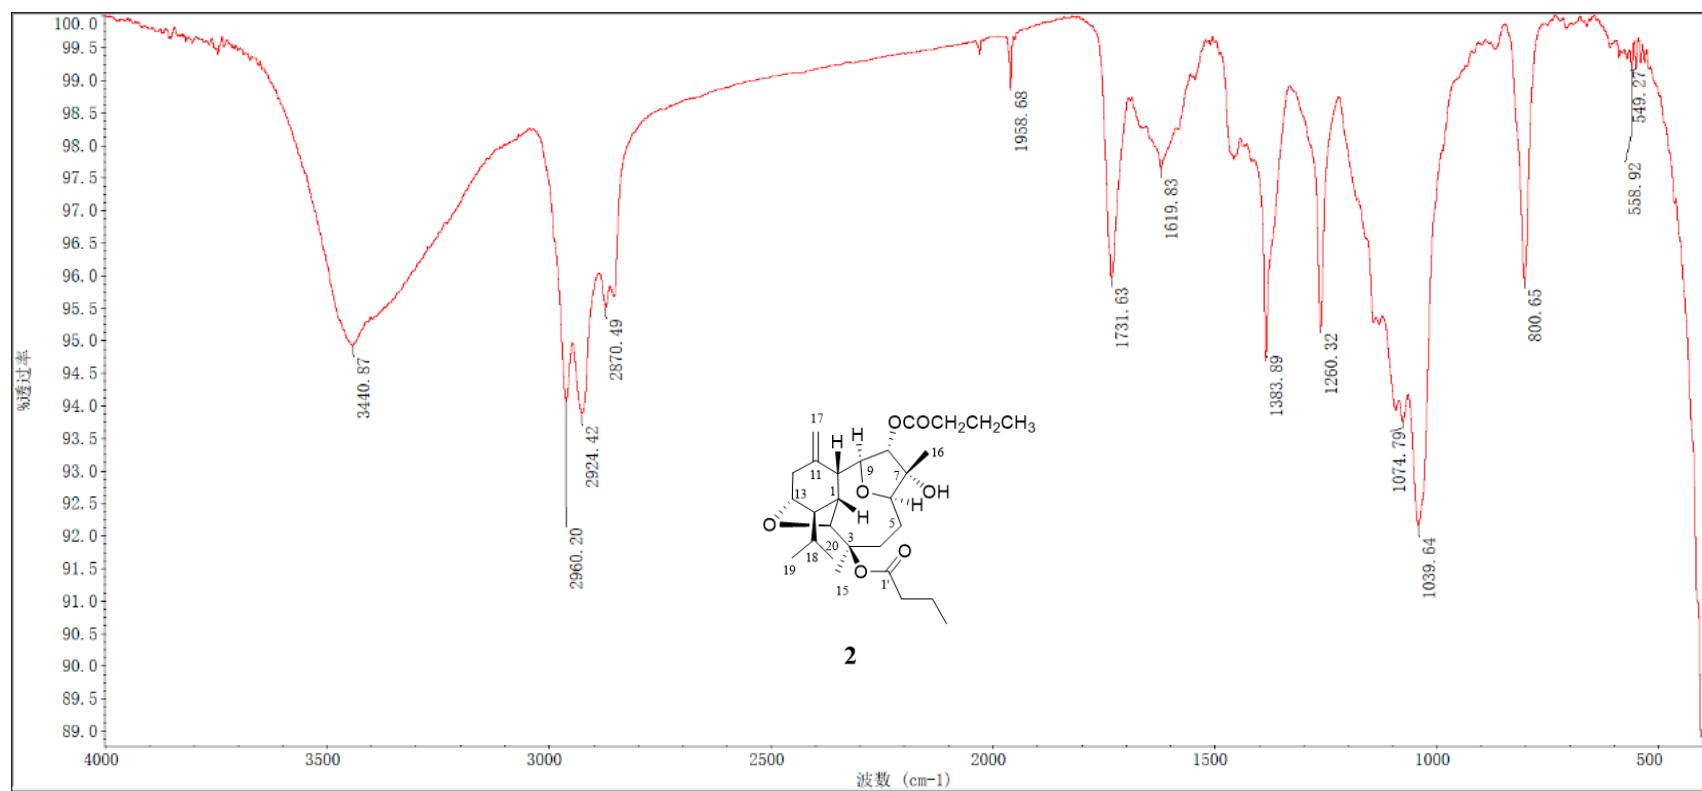

**Figure S16.** IR spectrum of ximaornatin B (2).

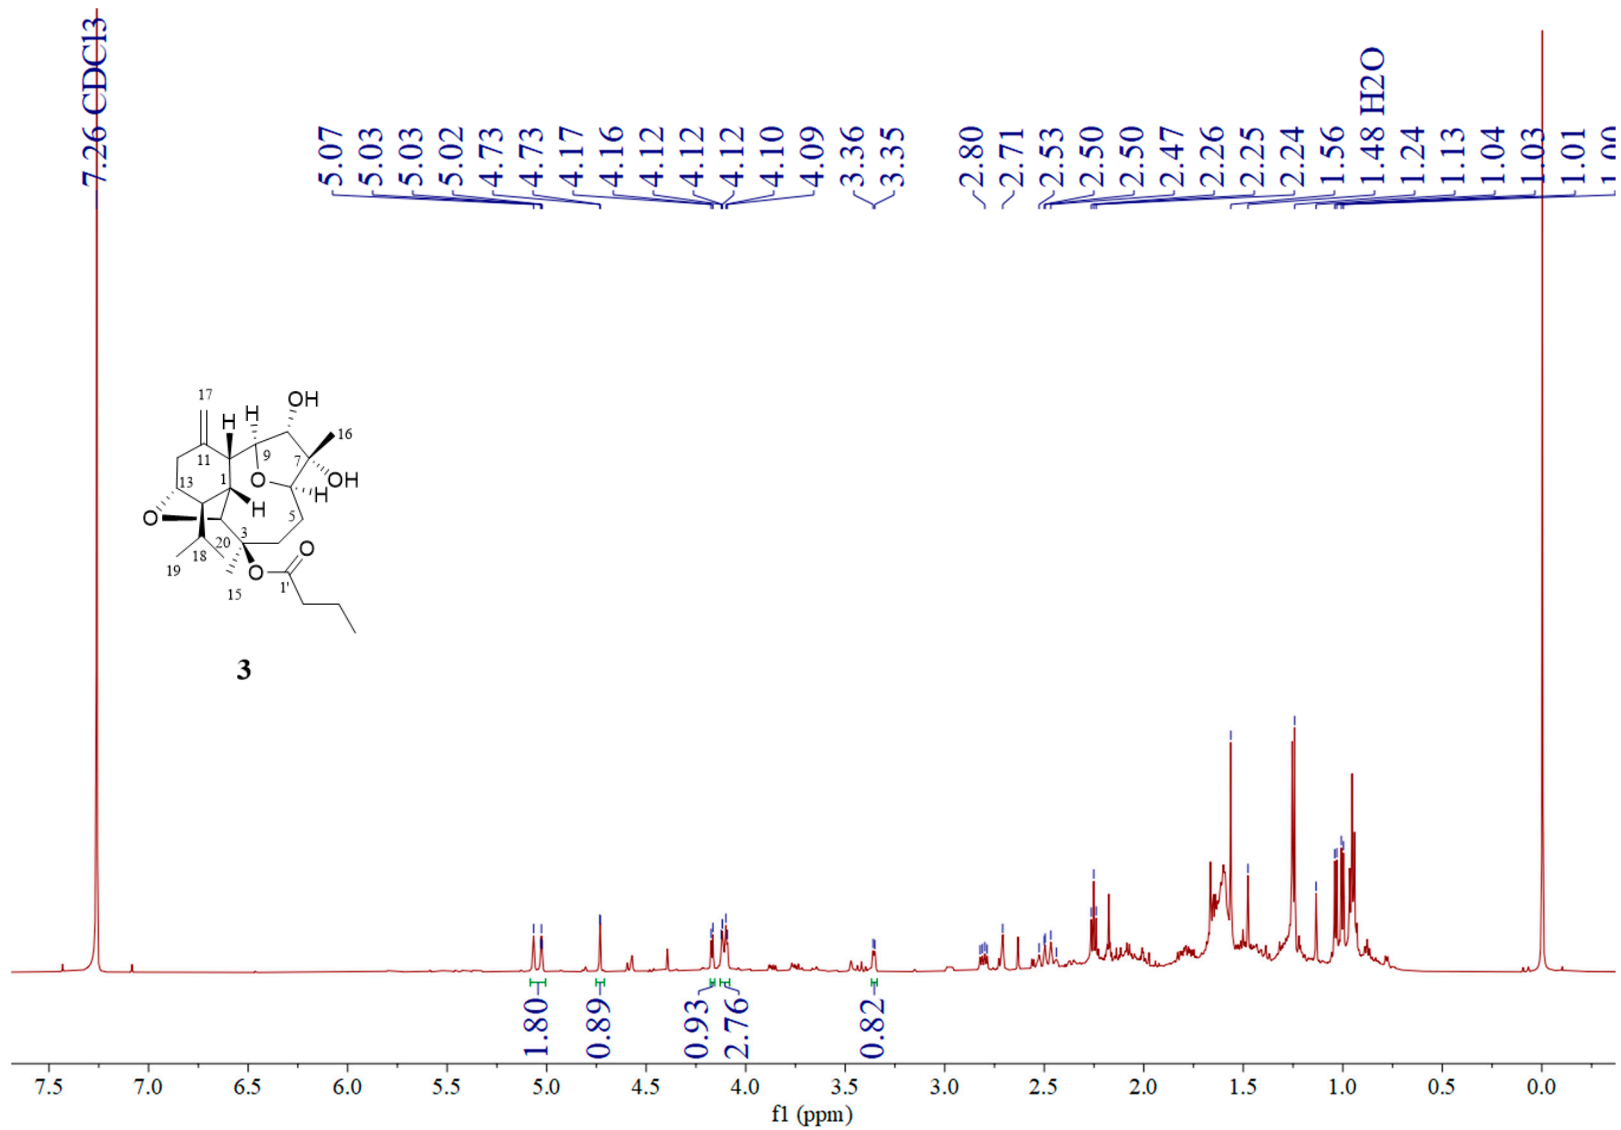

Figure S17. <sup>1</sup>H NMR spectrum of ximaornatin C (**3**) in CDCl<sub>3</sub>.

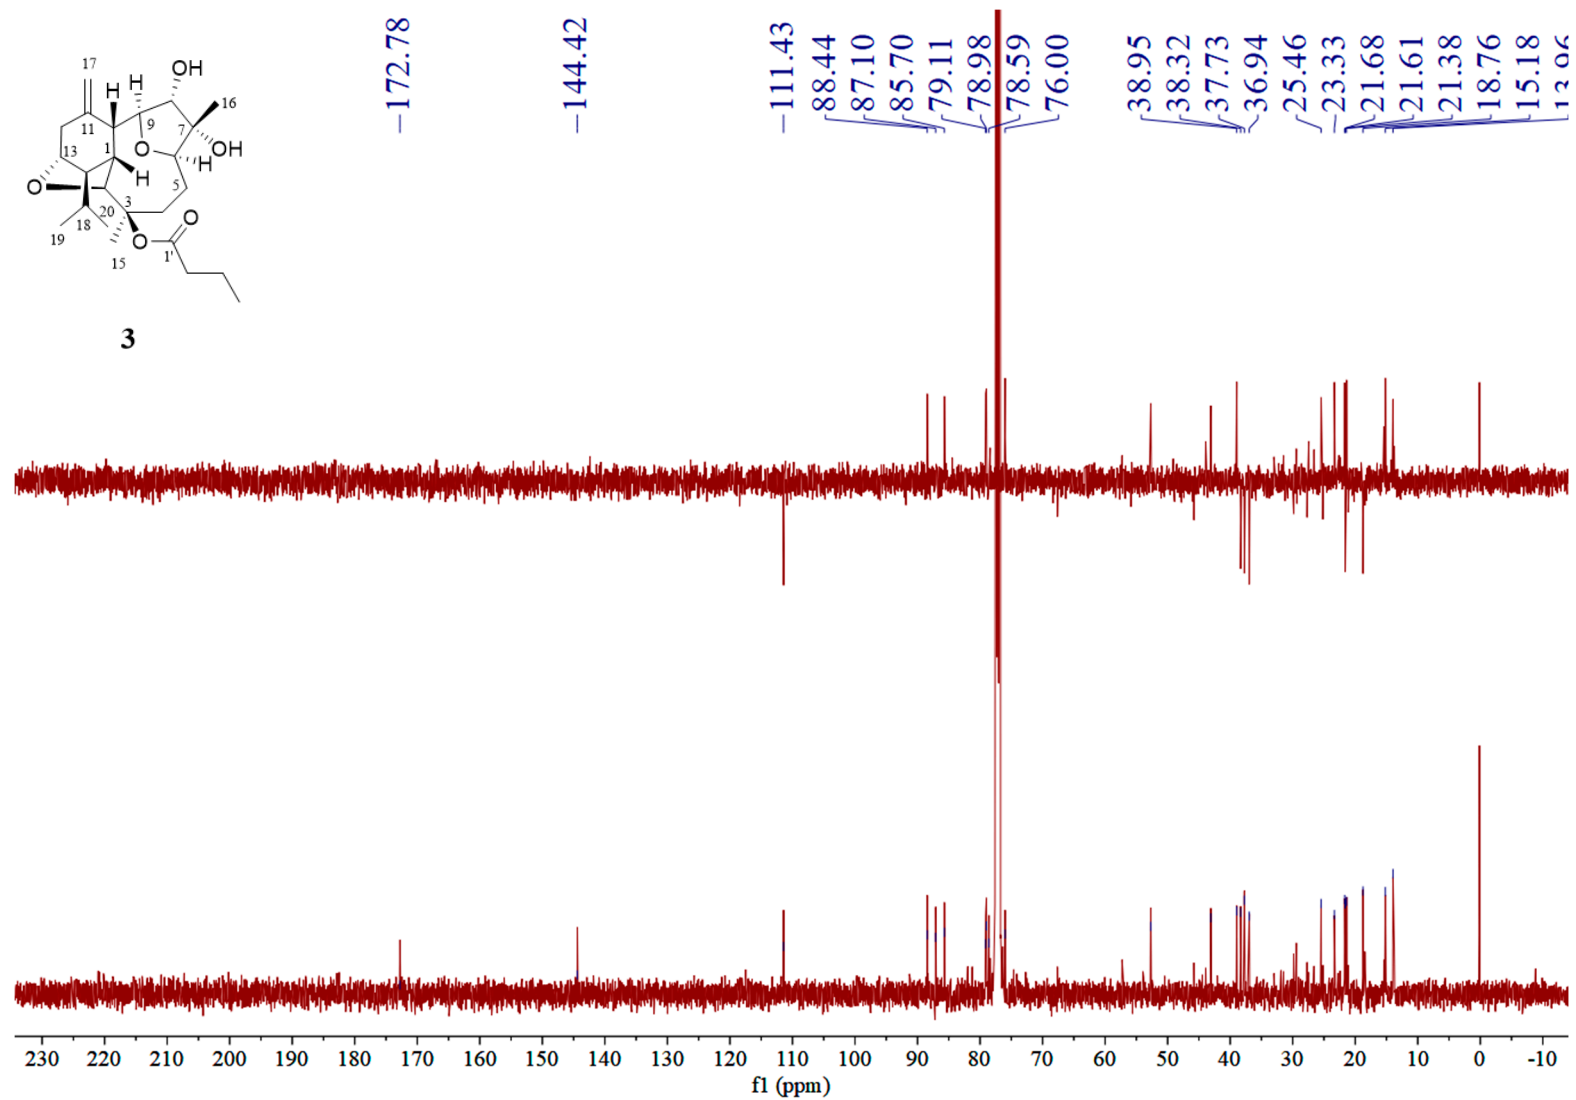

**Figure S18.**  $^{13}\text{C}$  NMR spectrum of ximaornatin C (**3**) in  $\text{CDCl}_3$ .

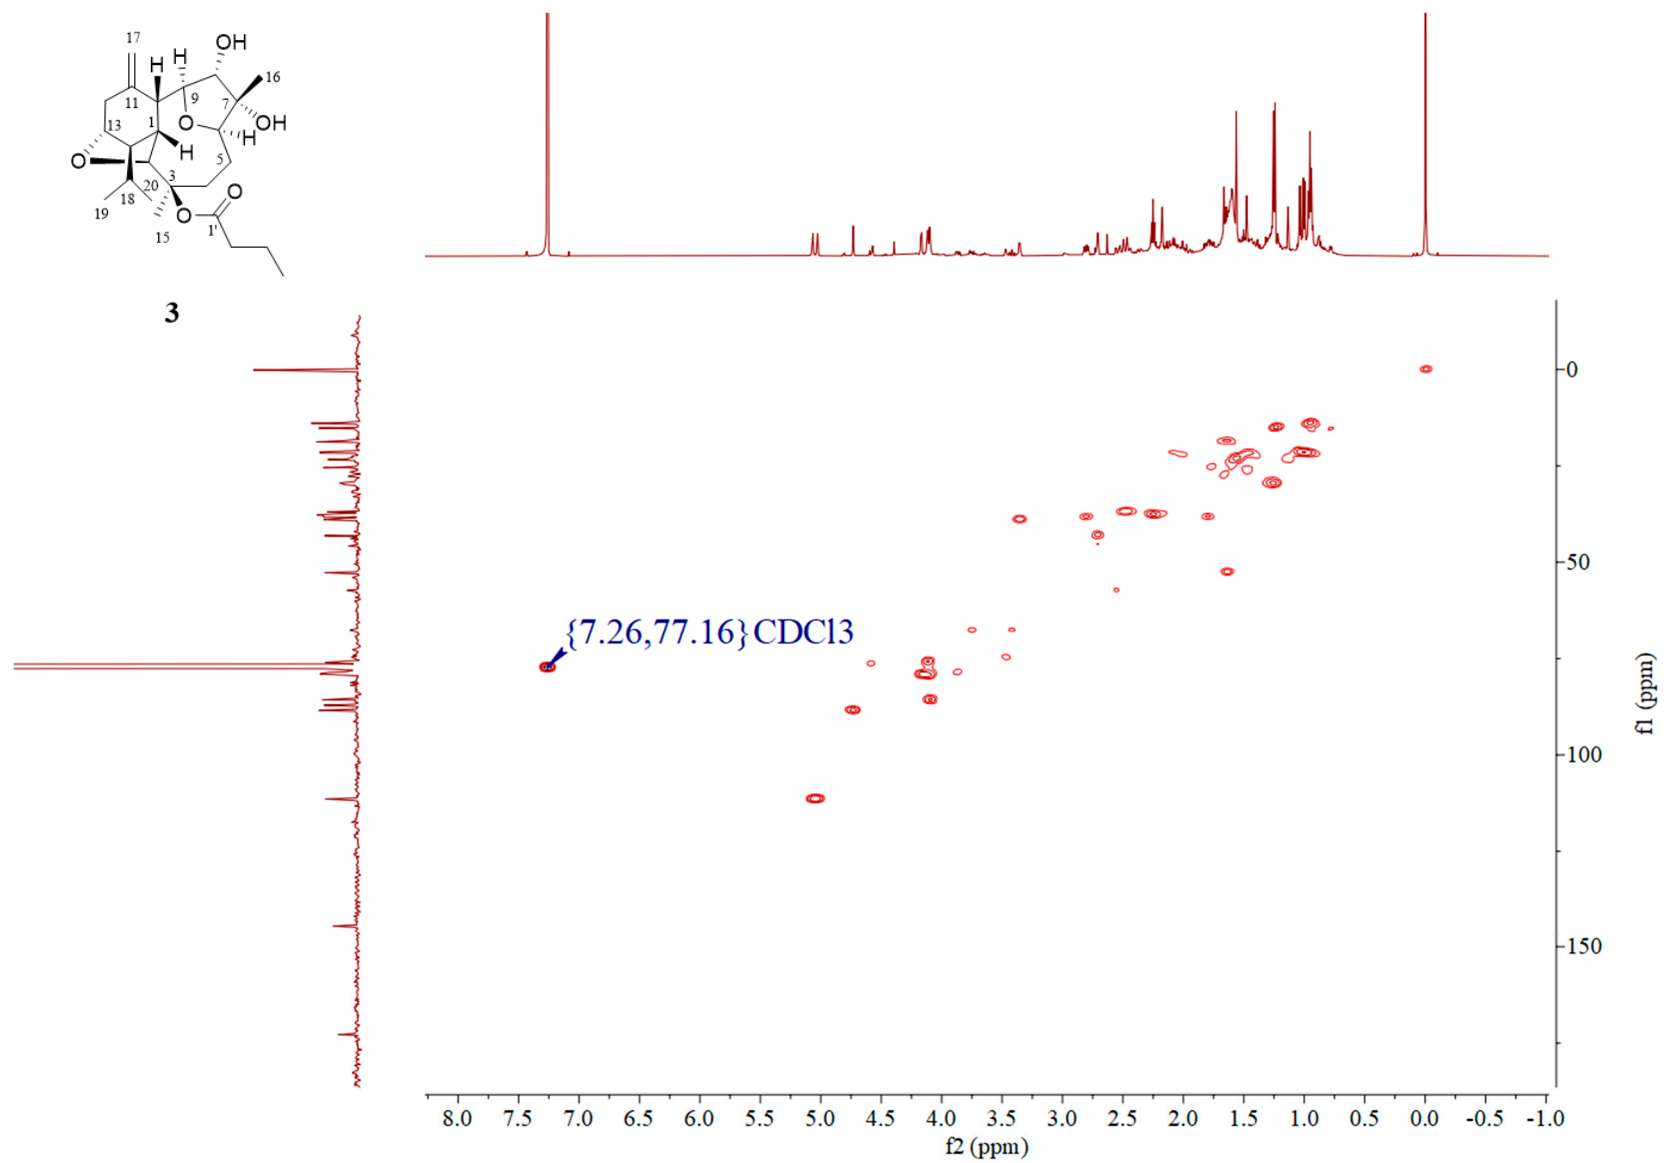

**Figure S19.** HSQC spectrum of ximaornatin C (**3**) in CDCl<sub>3</sub>.

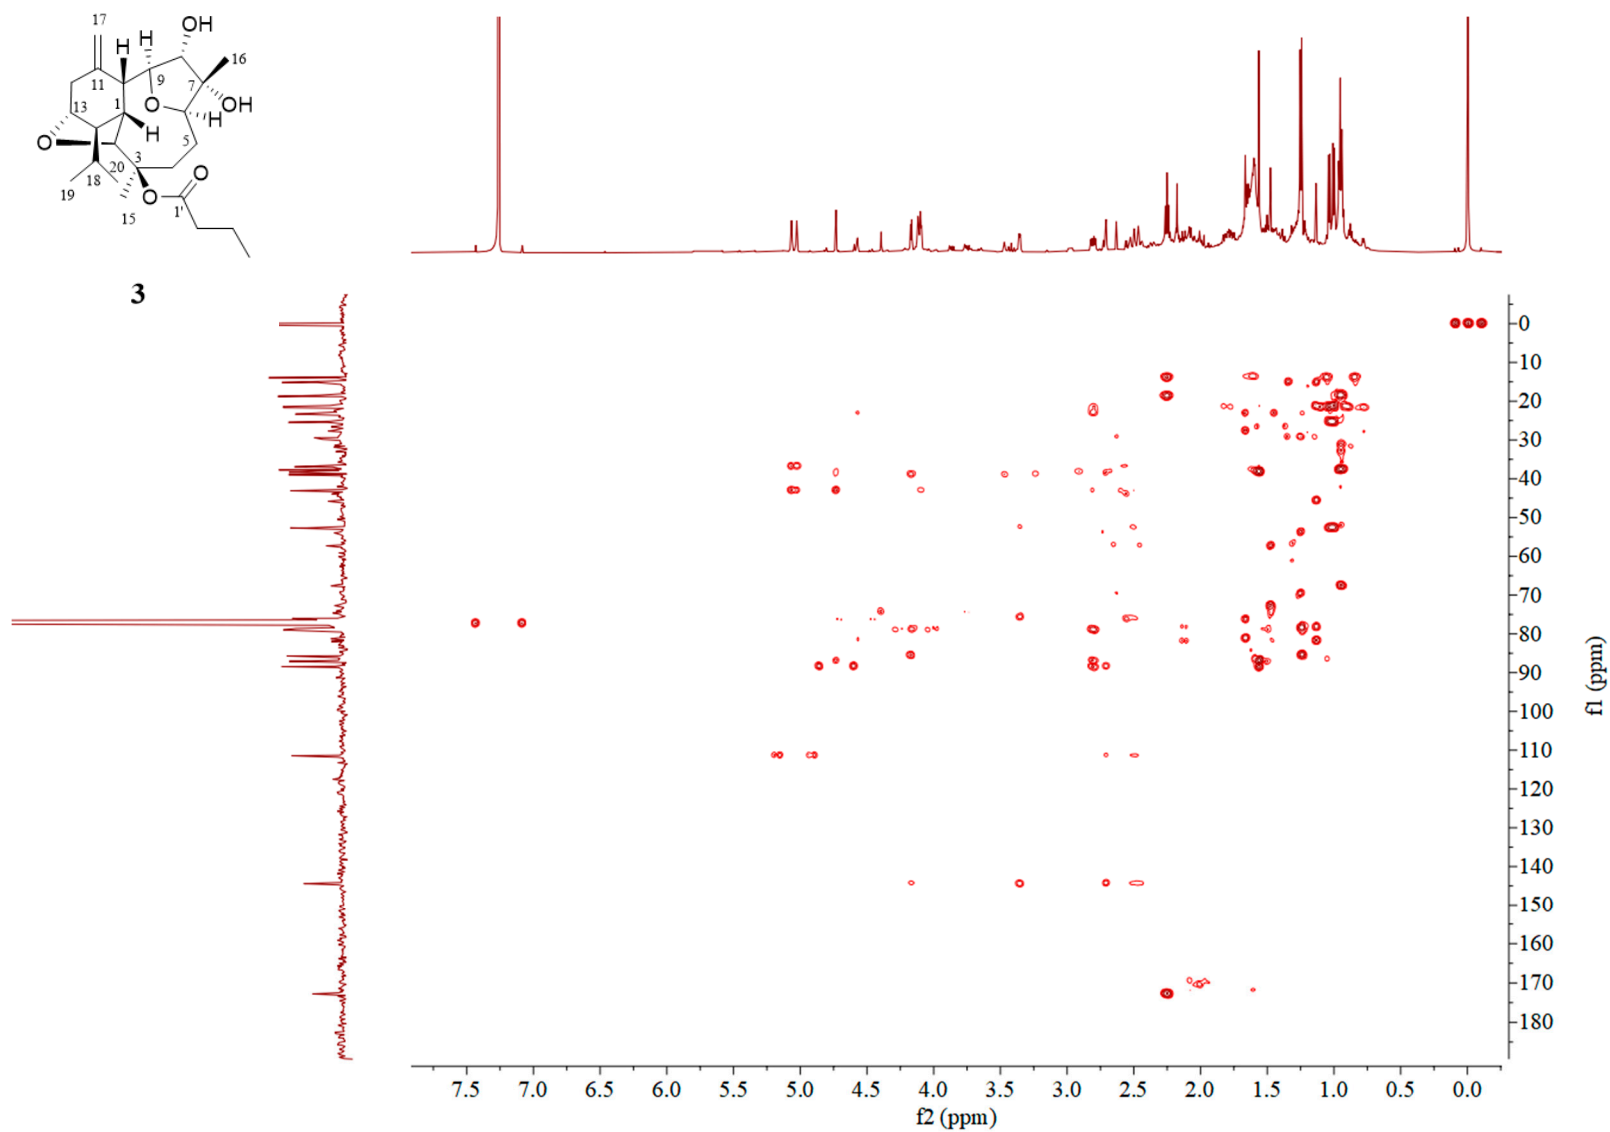

**Figure S20.** HMBC spectrum of ximaornatin C (**3**) in CDCl<sub>3</sub>.

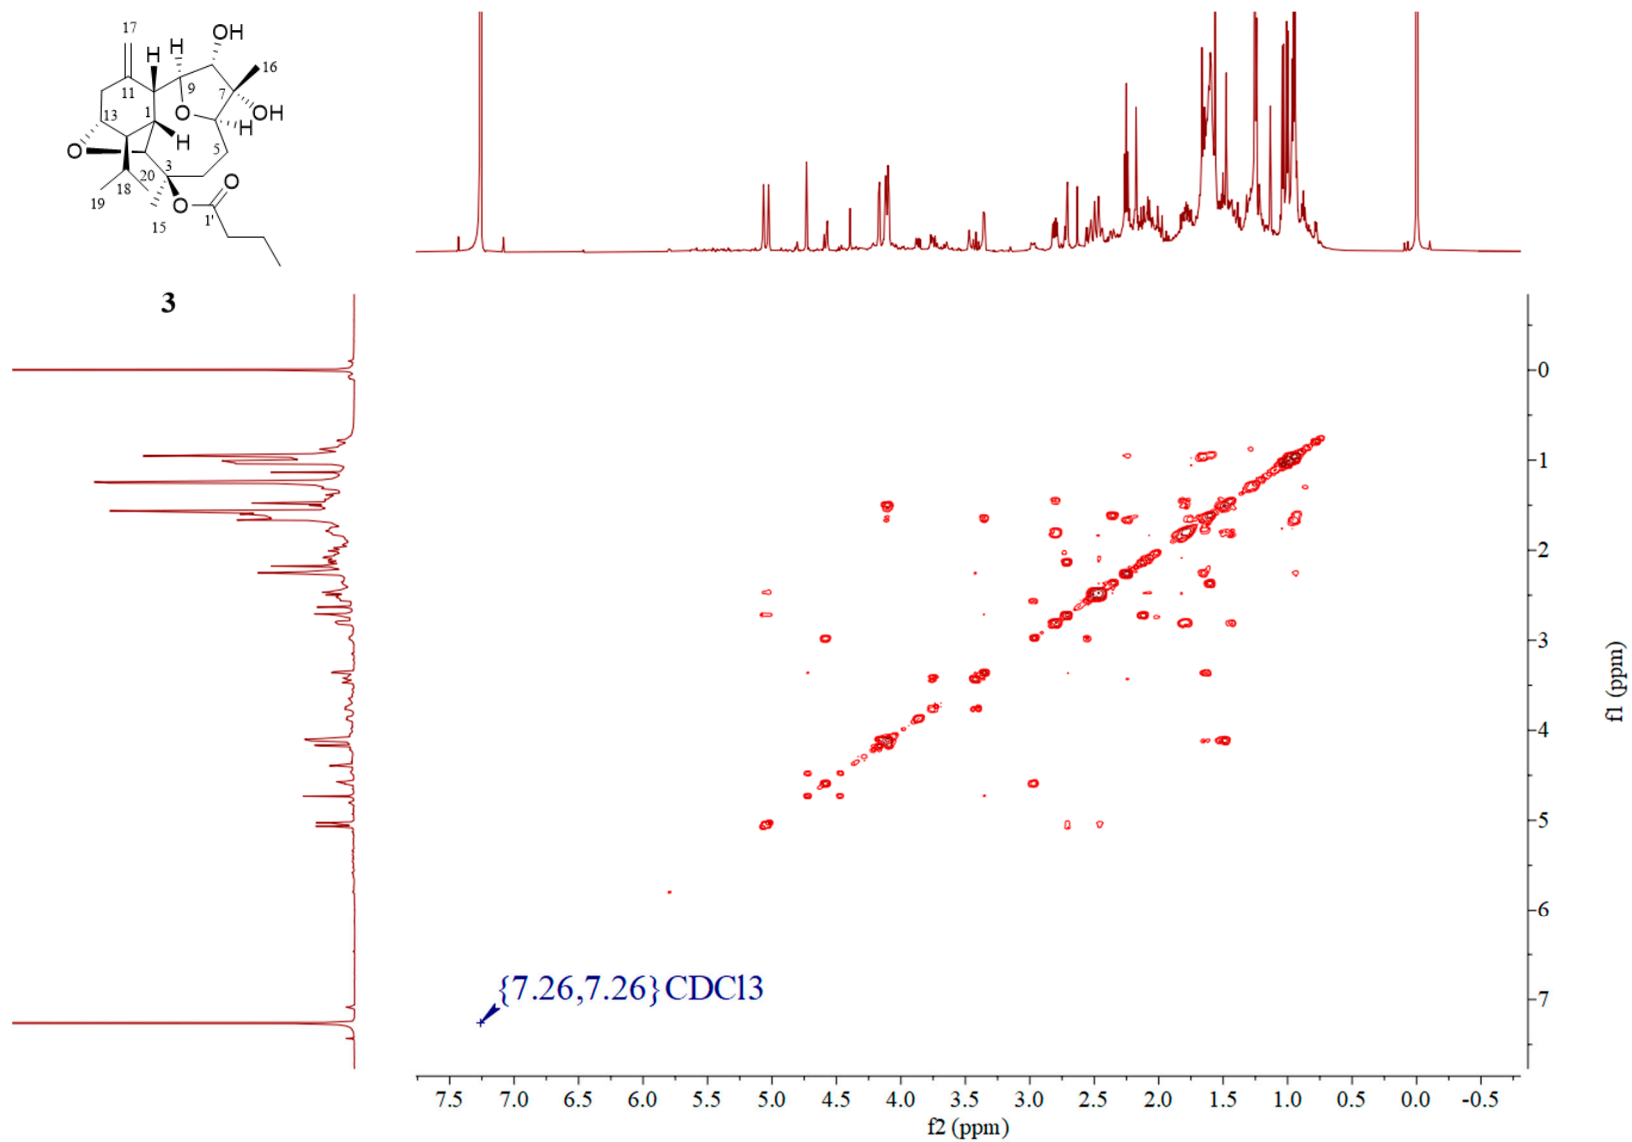

**Figure S21.**  $^1\text{H}$ - $^1\text{H}$  COSY spectrum of ximaornatin C (**3**) in  $\text{CDCl}_3$ .

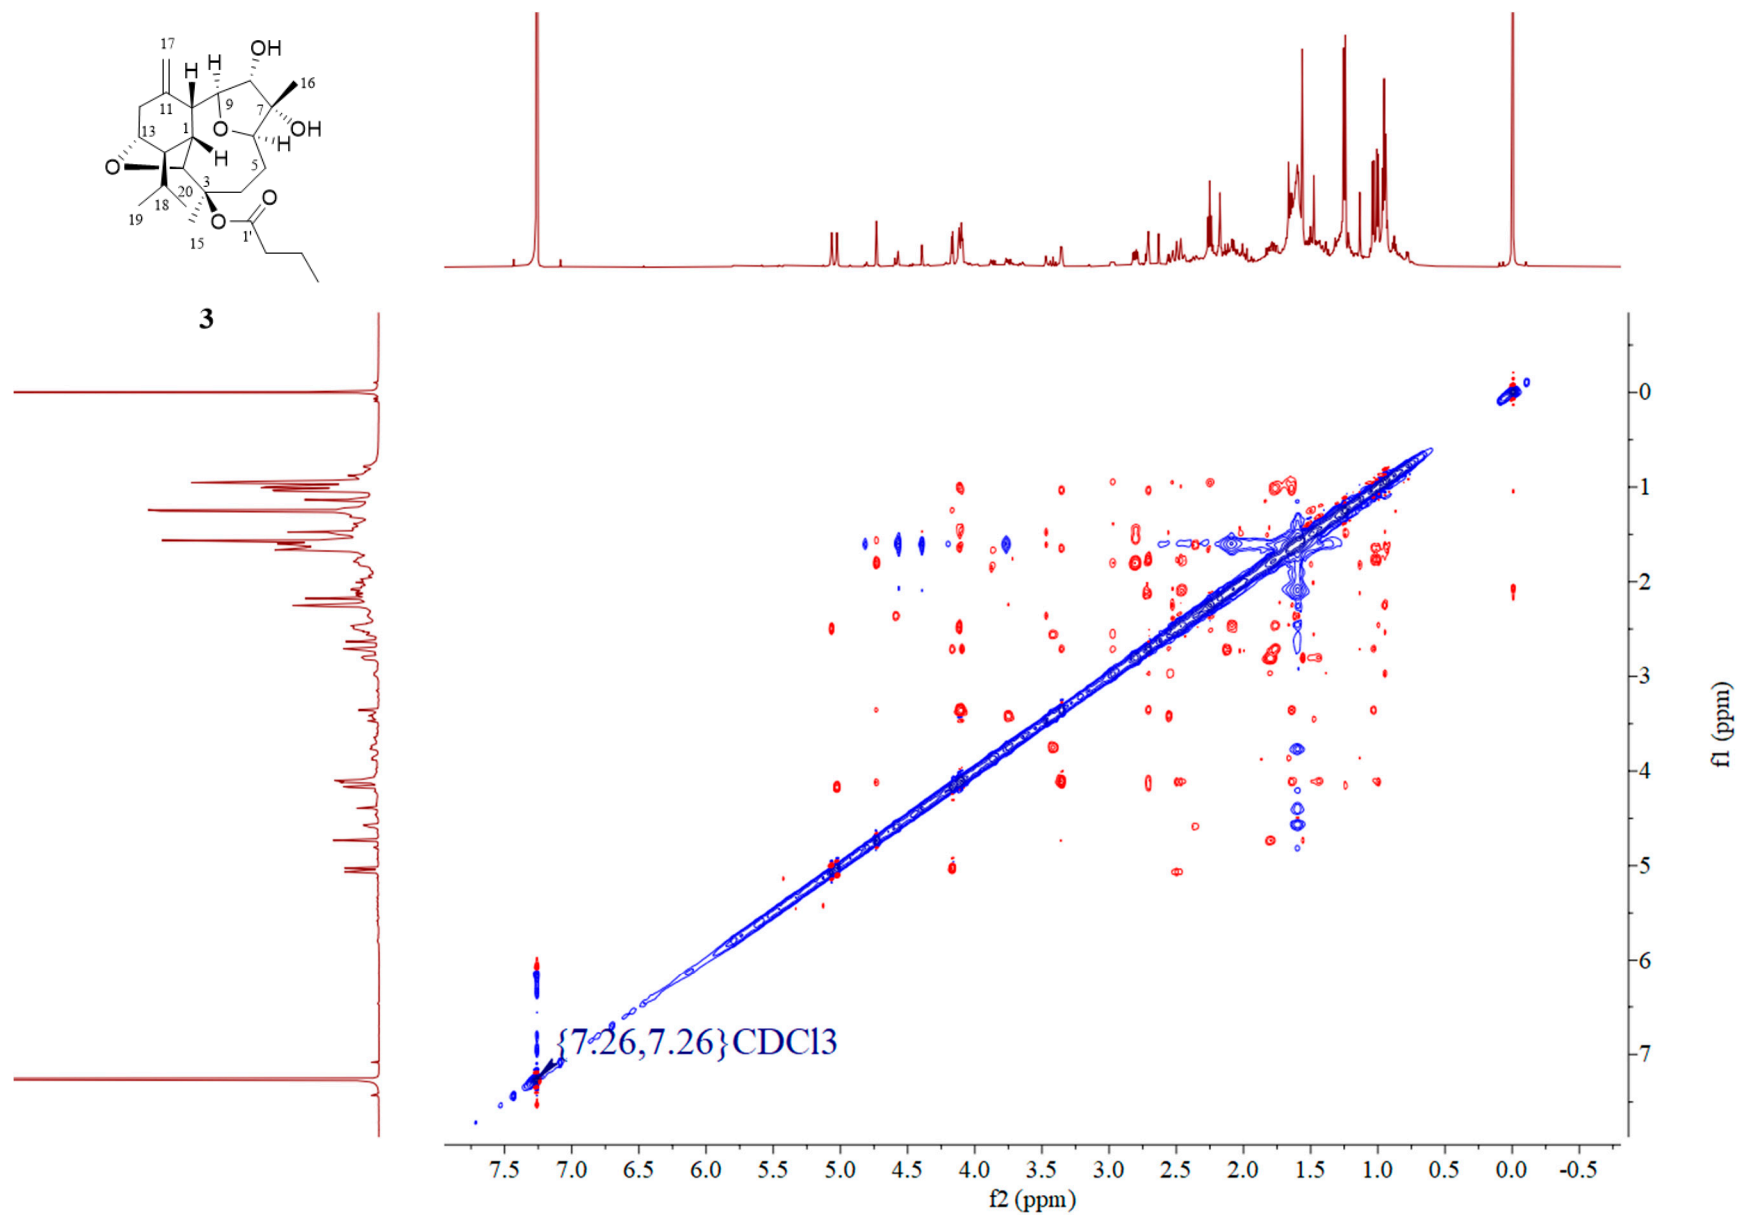

**Figure S22.** NOESY spectrum of ximaornatin C (**3**) in  $\text{CDCl}_3$ .



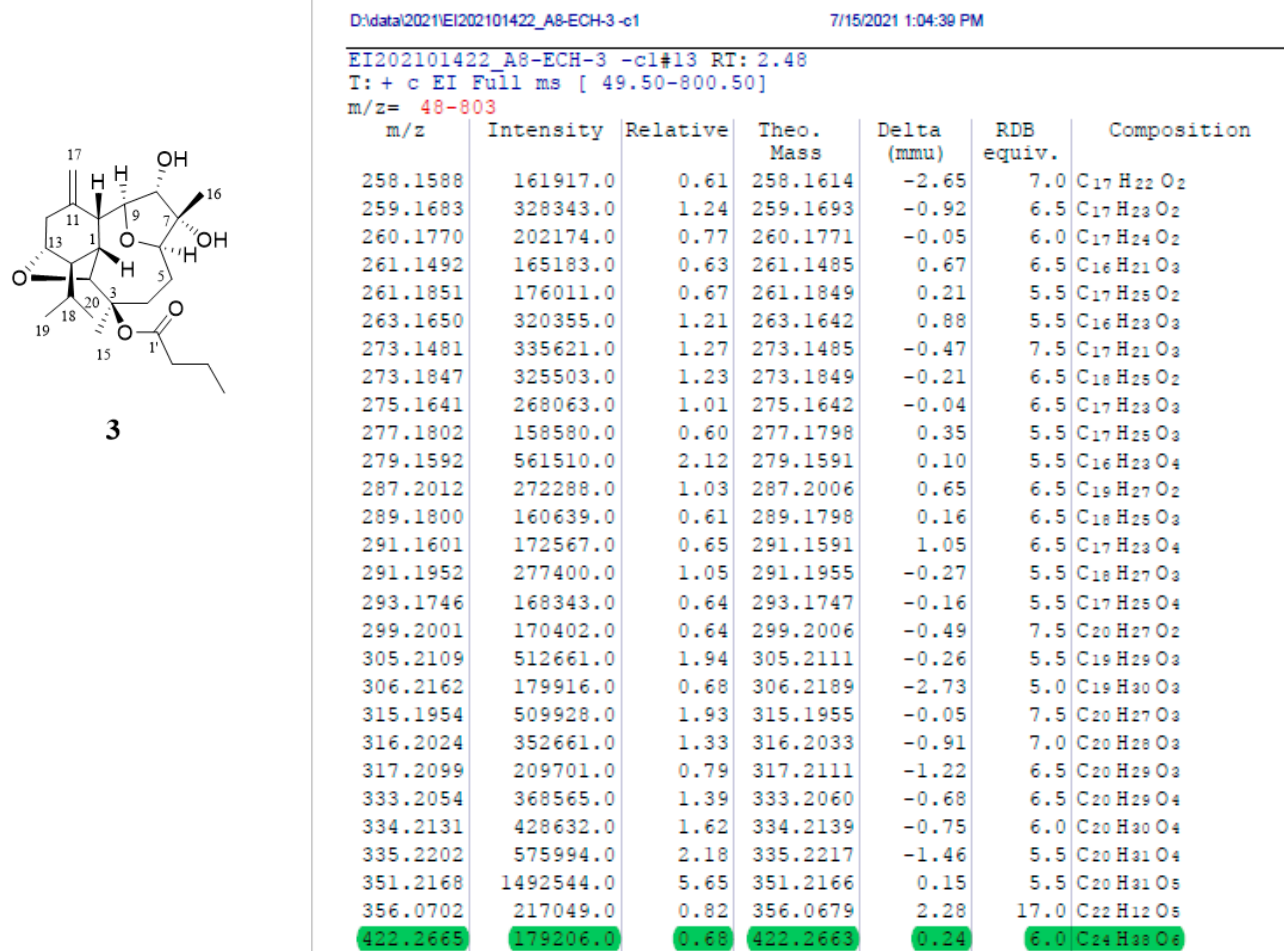

Figure S23. HREIMS spectrum of ximaornatin C (**3**) in MeOH.

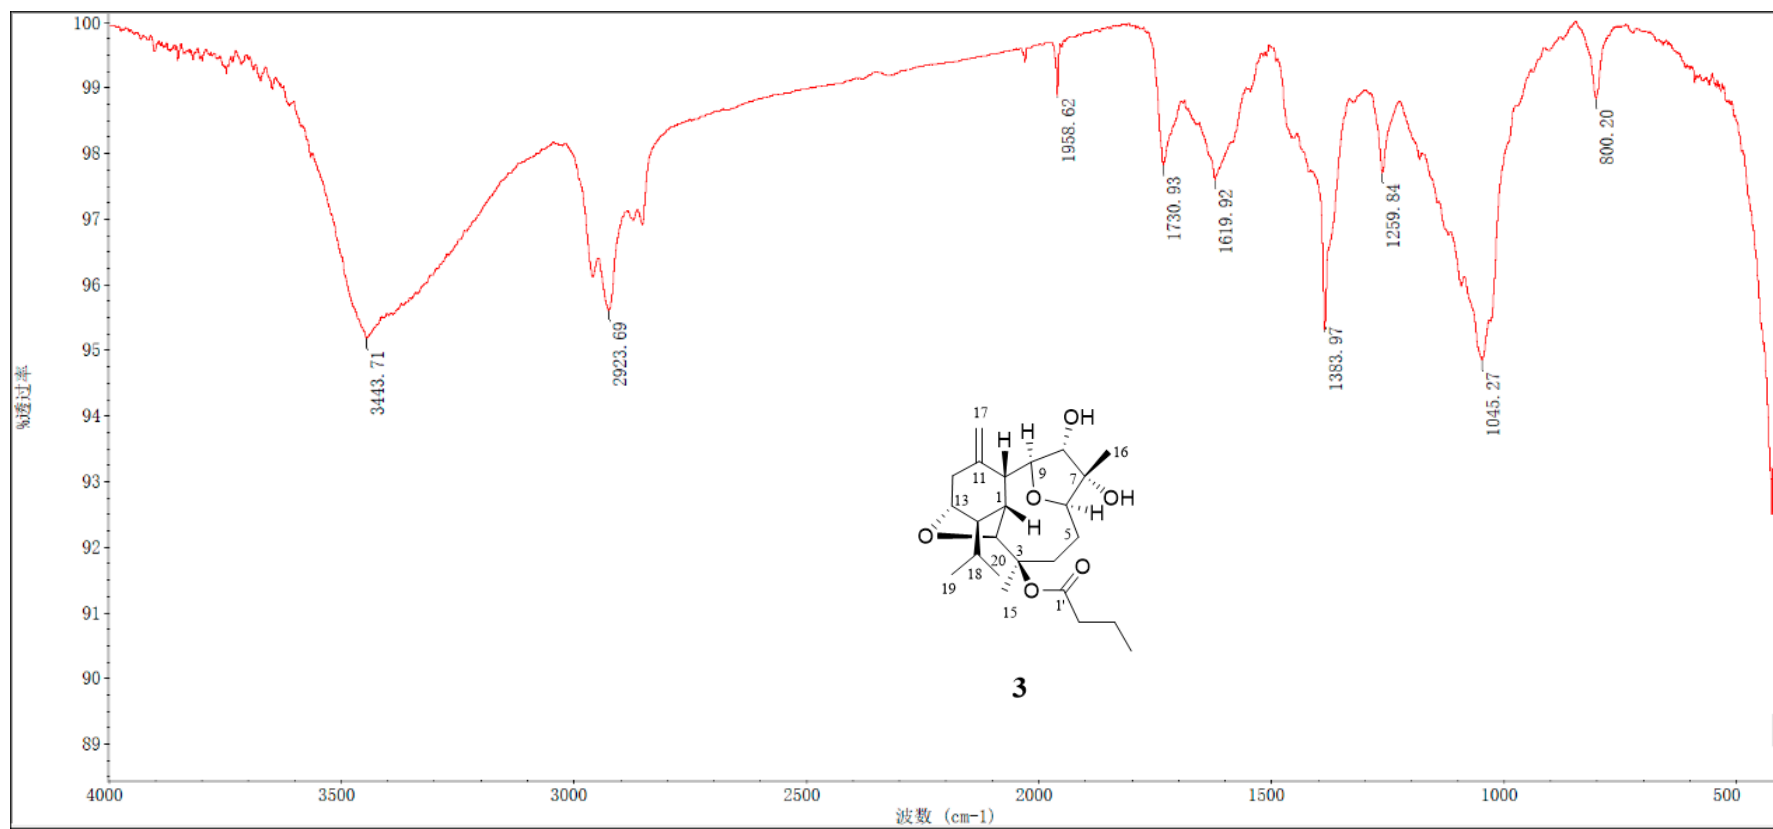

**Figure S24.** IR spectrum of ximaornatin C (**3**).

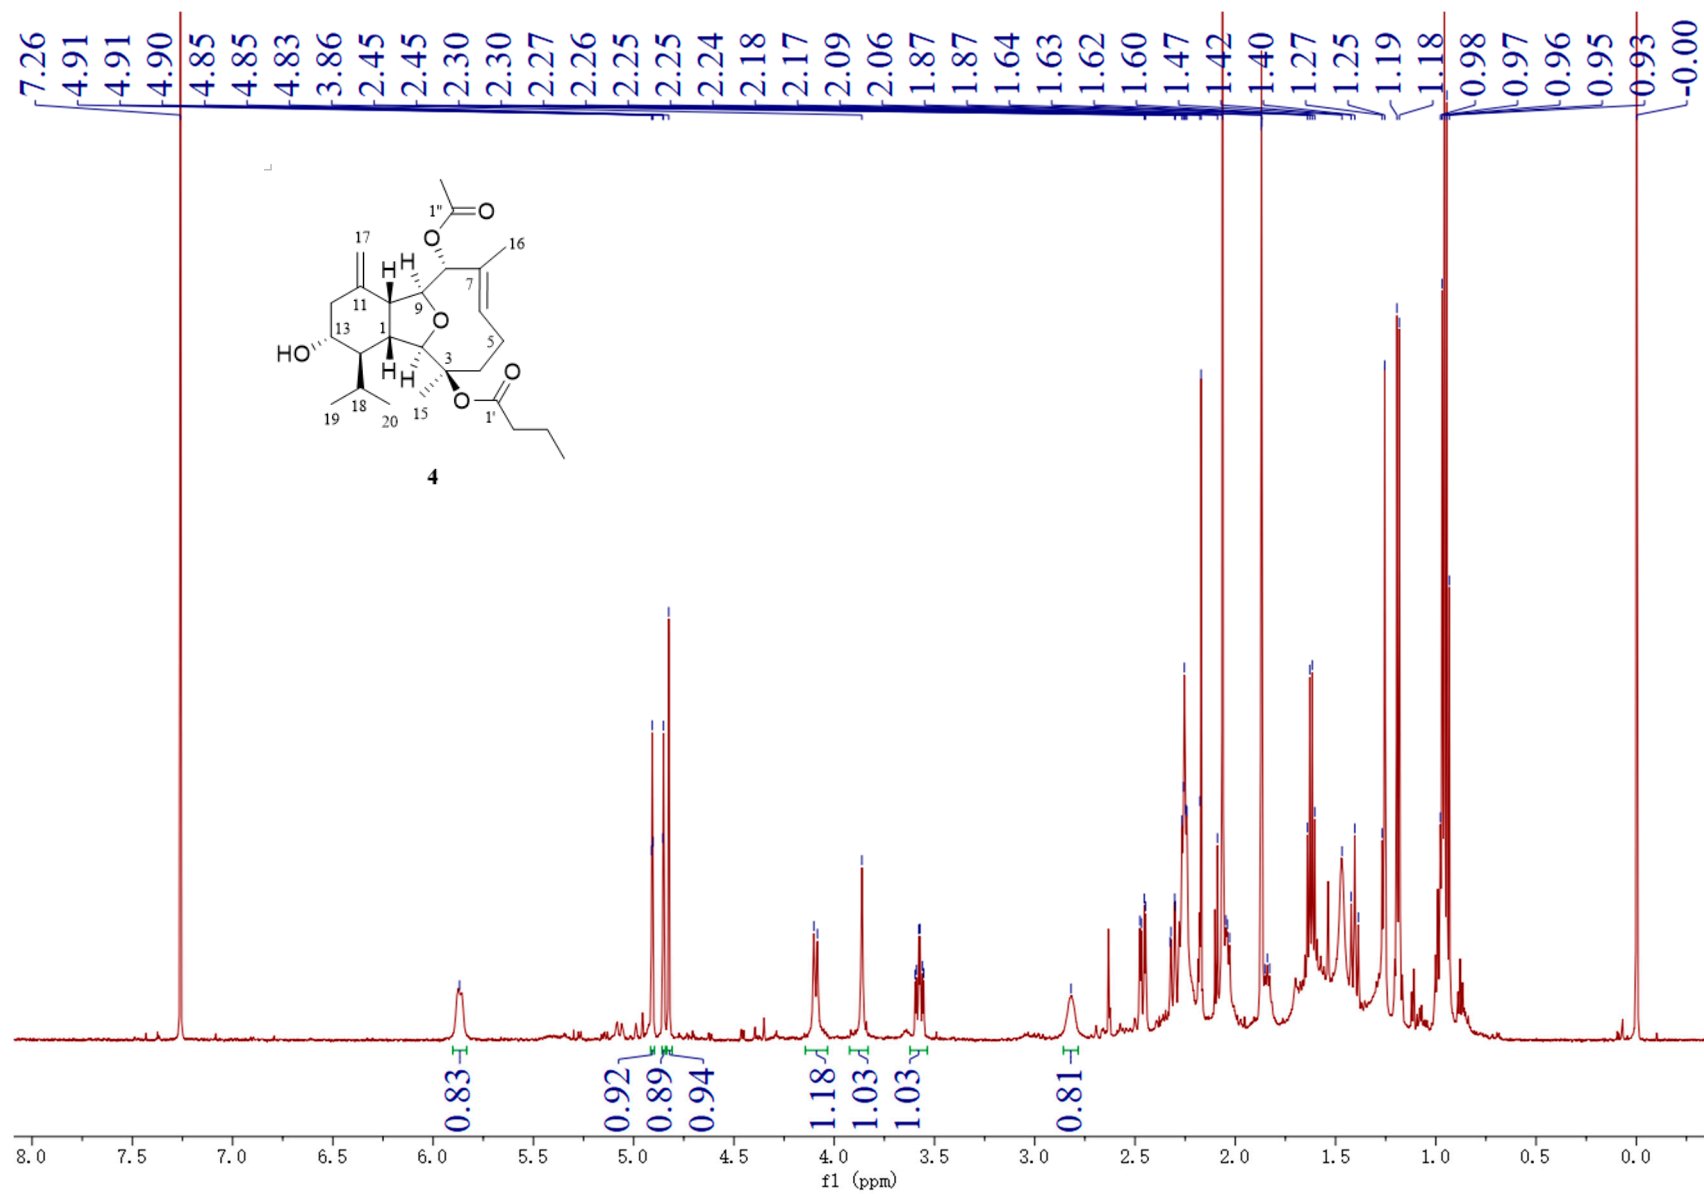

**Figure S25.**  $^1\text{H}$  NMR spectrum of lithophynin K (4) in  $\text{CDCl}_3$ .

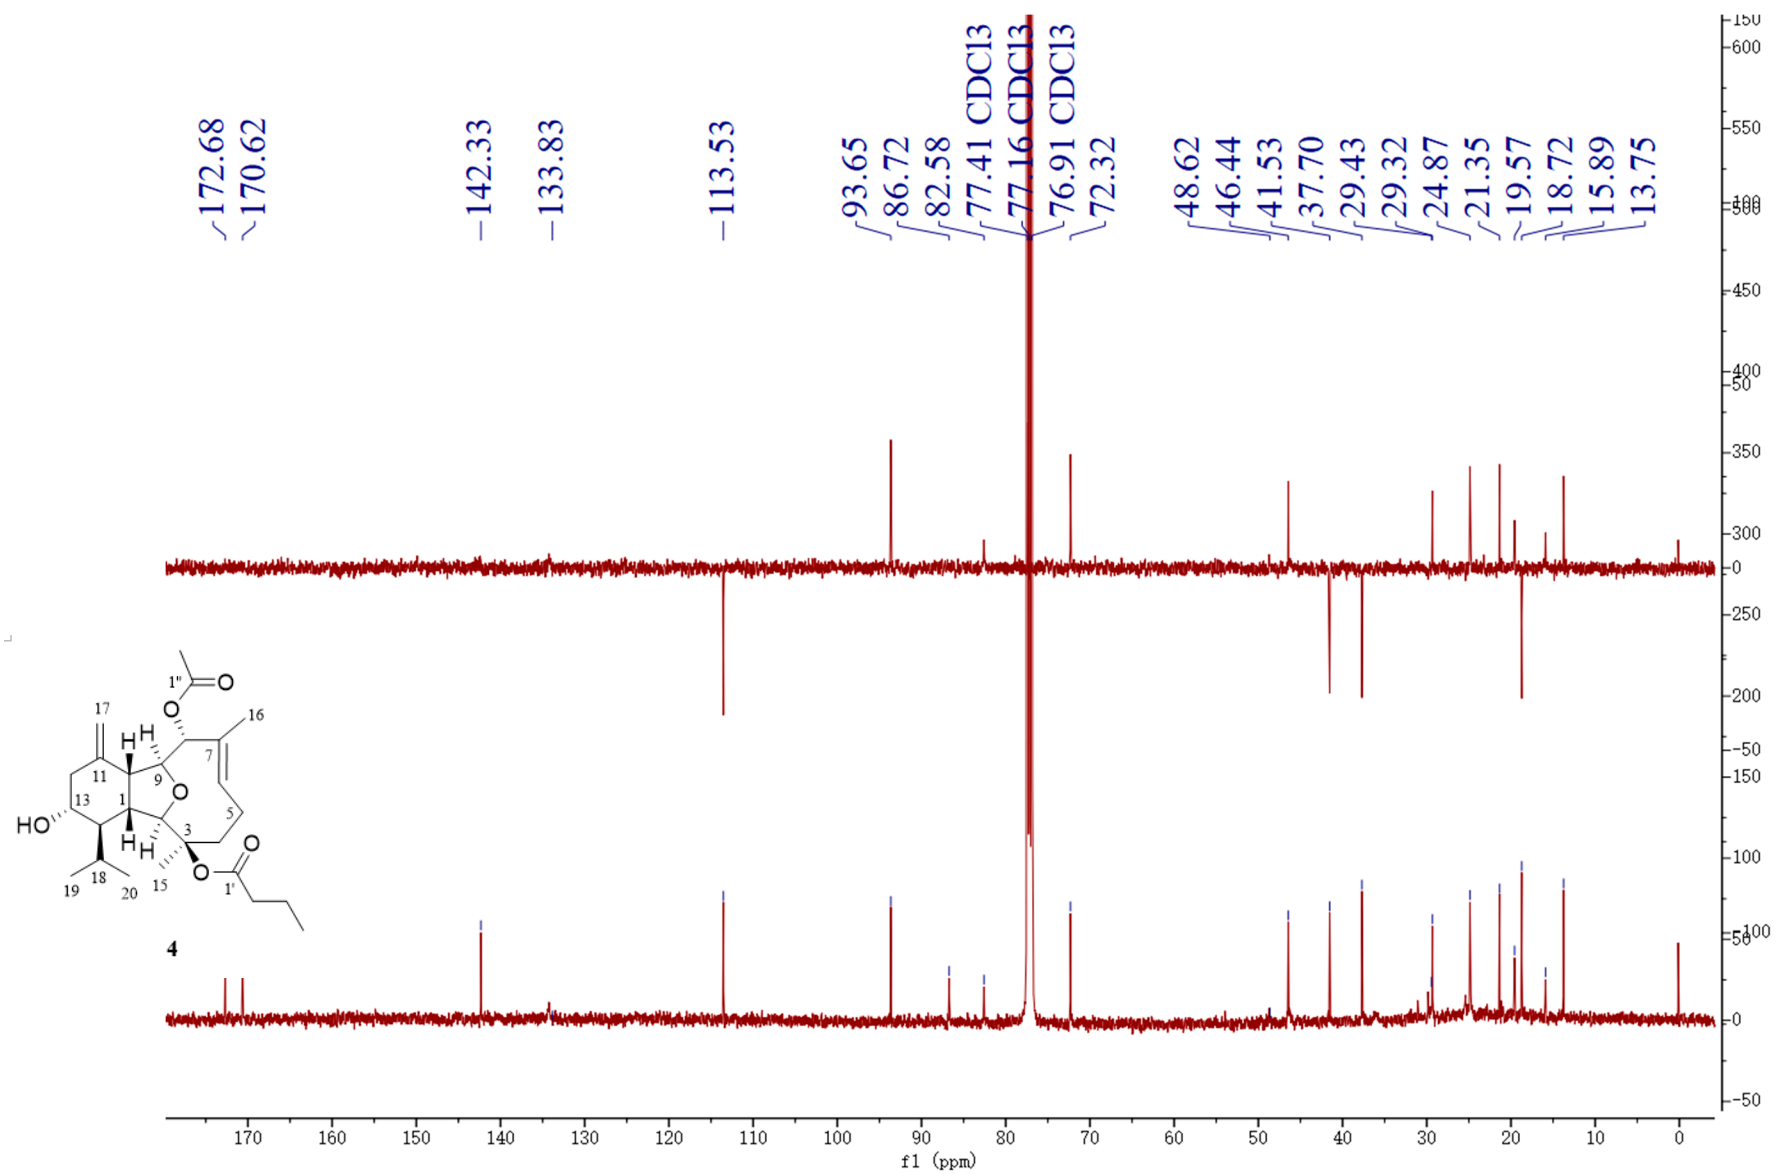

**Figure S26.**  $^{13}\text{C}$  NMR spectrum of lithophynin K (4) in  $\text{CDCl}_3$ .

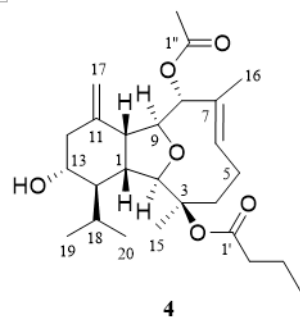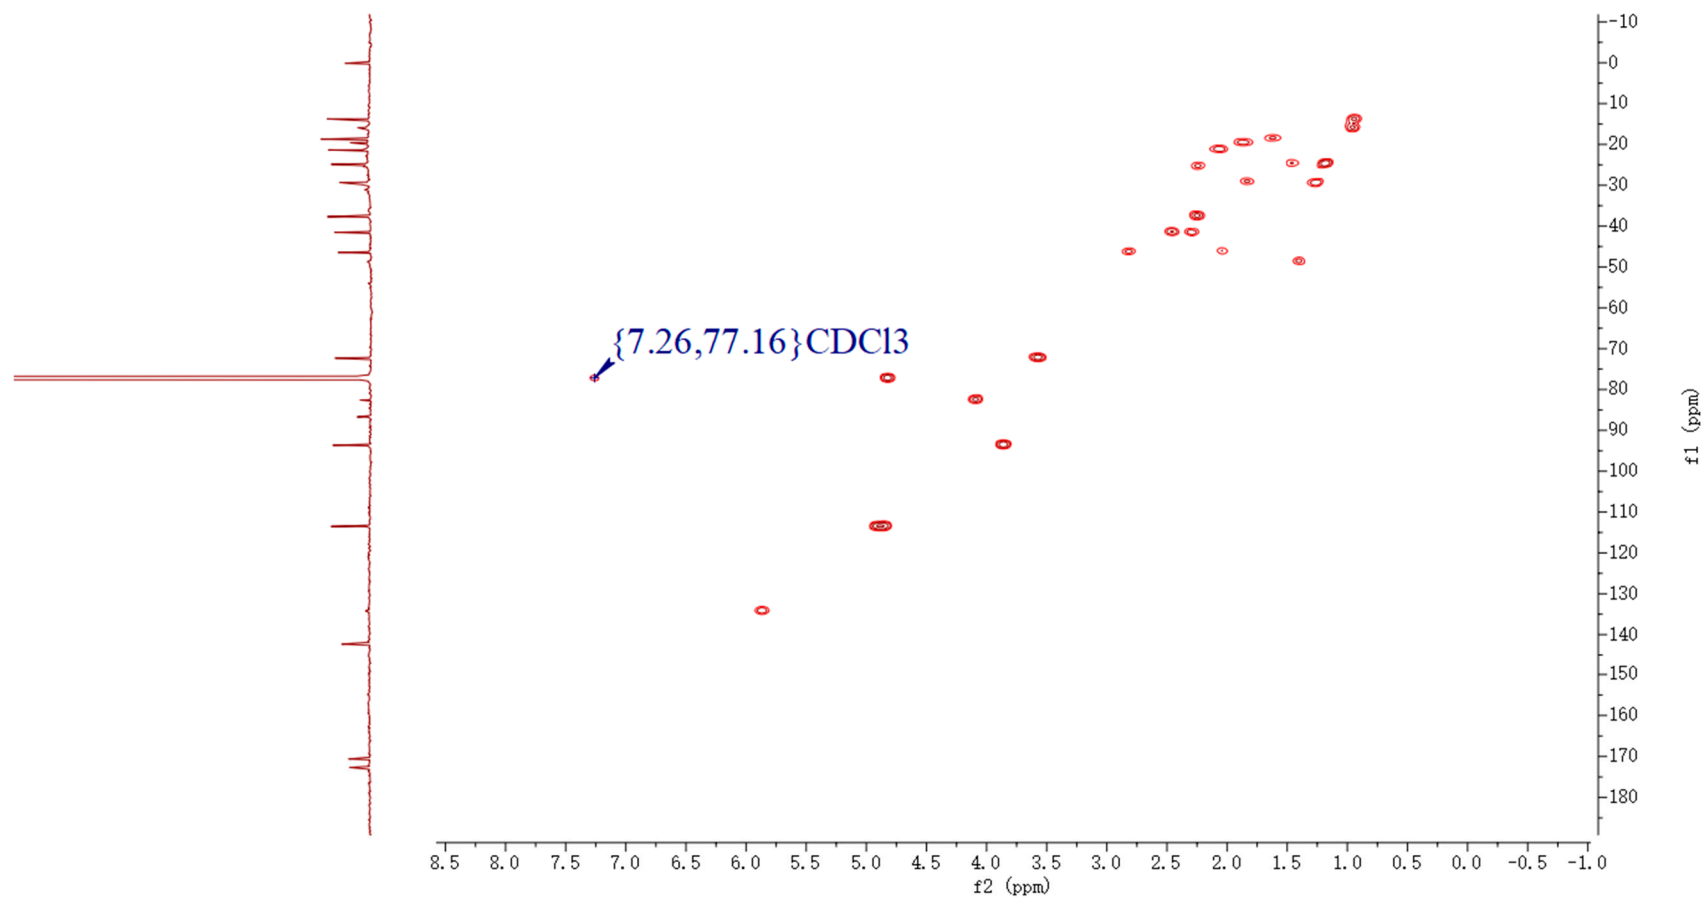

**Figure S27.** HSQC spectrum of litophynin K (4) in CDCl<sub>3</sub>.

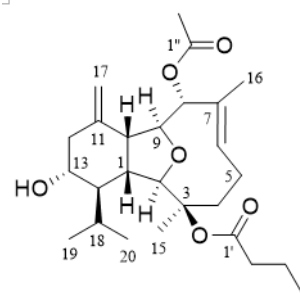

4

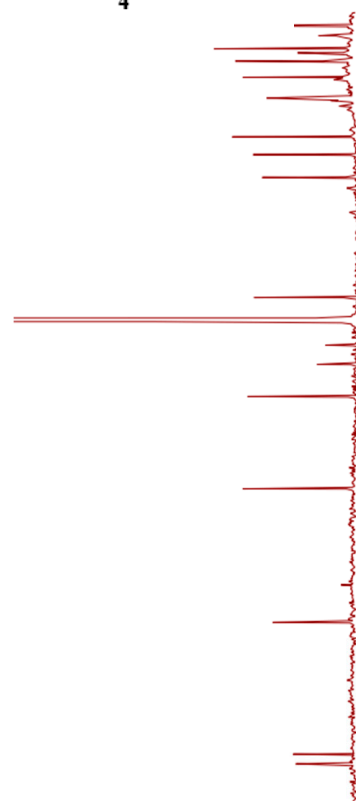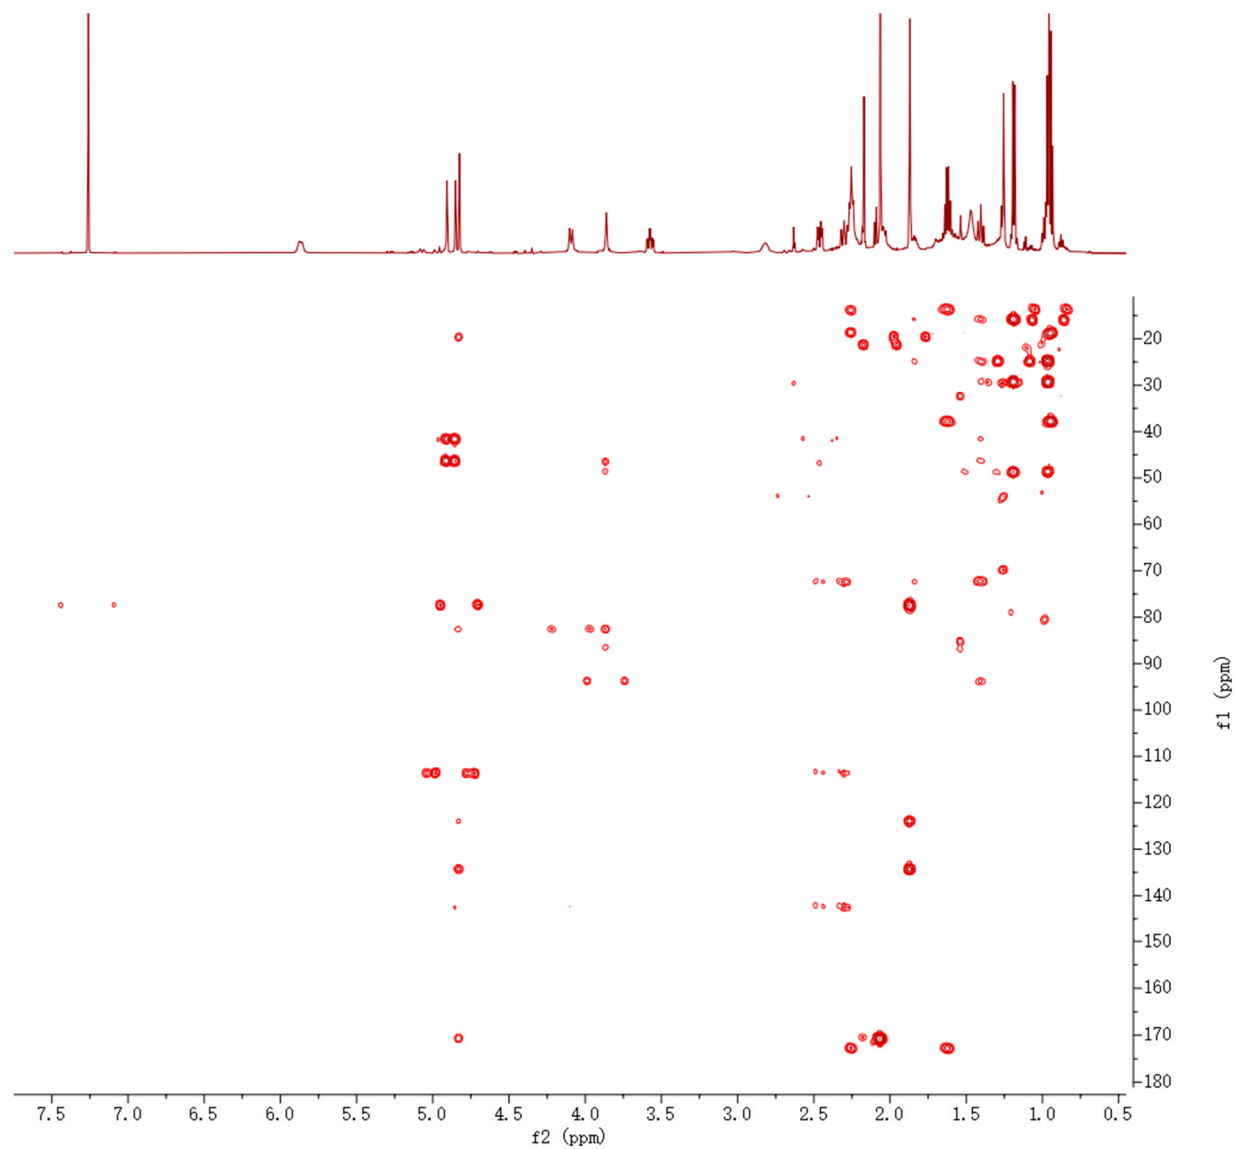

**Figure S28.** HMBC spectrum of litophynin K (4) in  $\text{CDCl}_3$ .

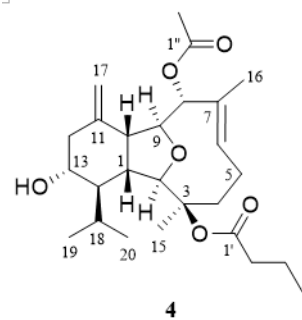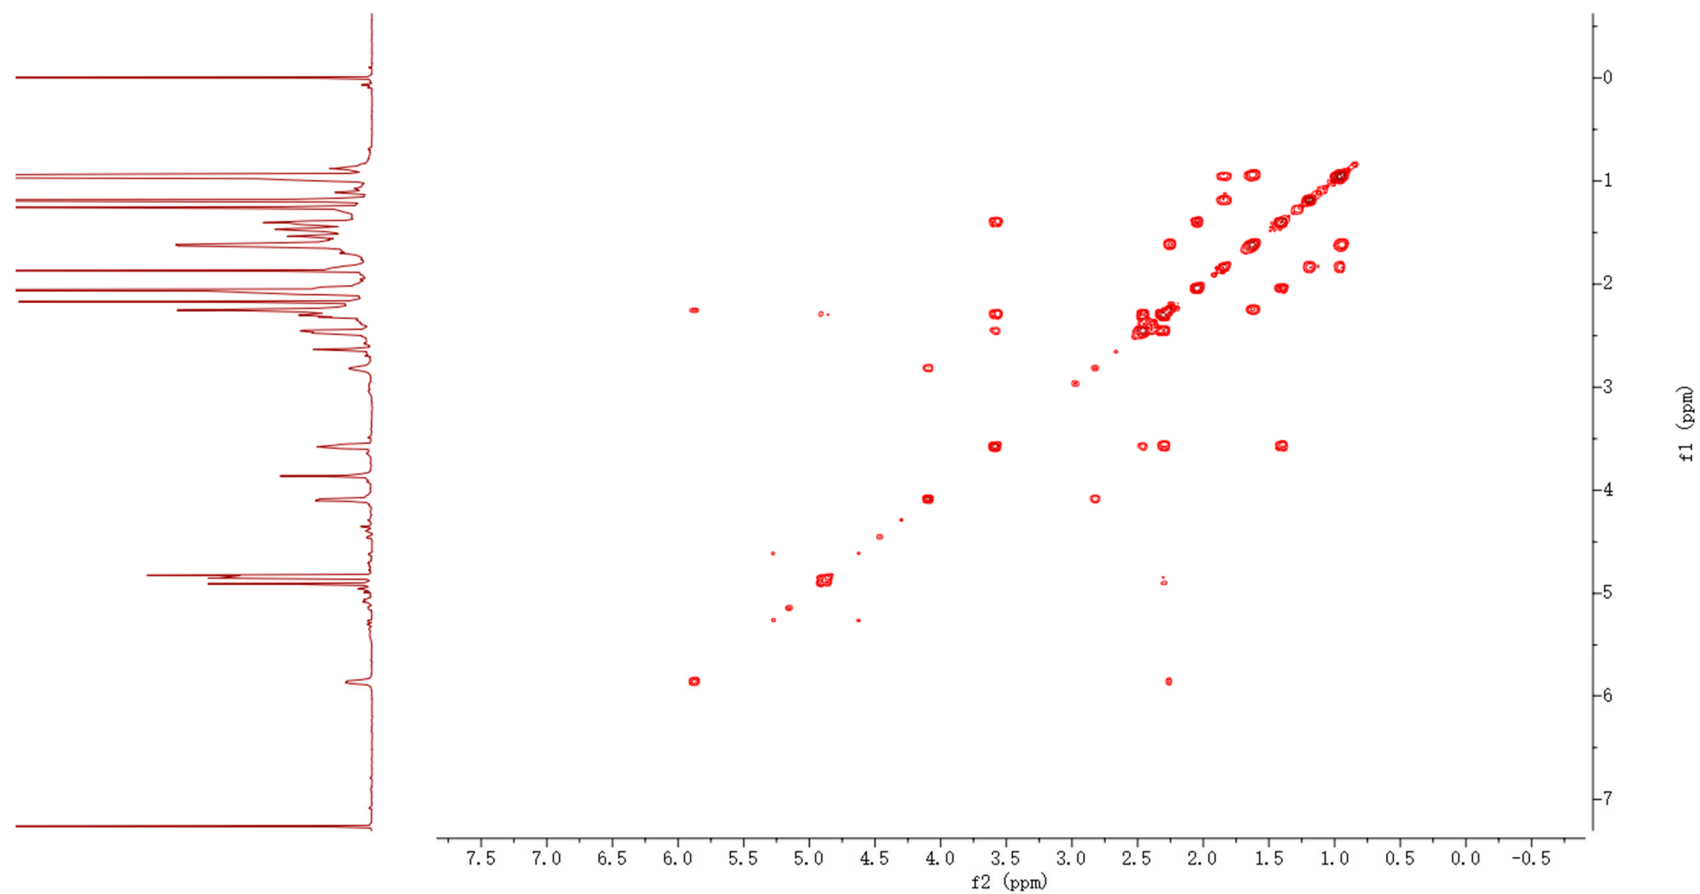

**Figure S29.**  $^1\text{H}$ - $^1\text{H}$  COSY spectrum of lithophynin K (4) in  $\text{CDCl}_3$ .

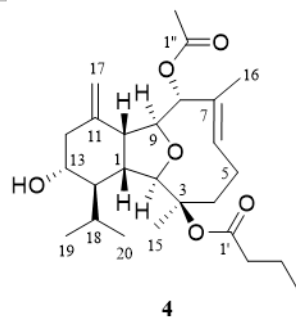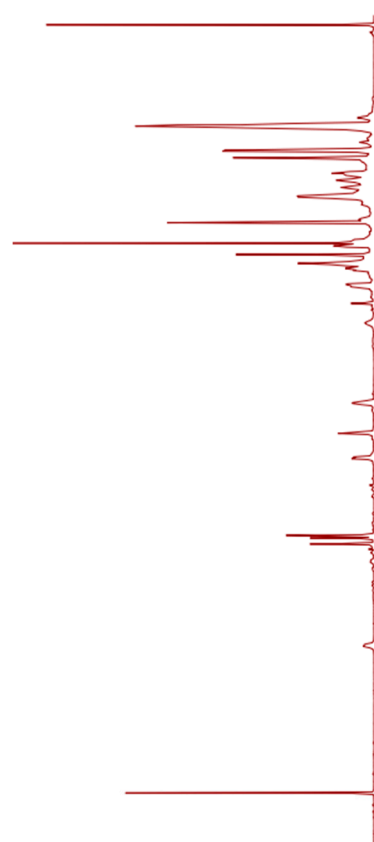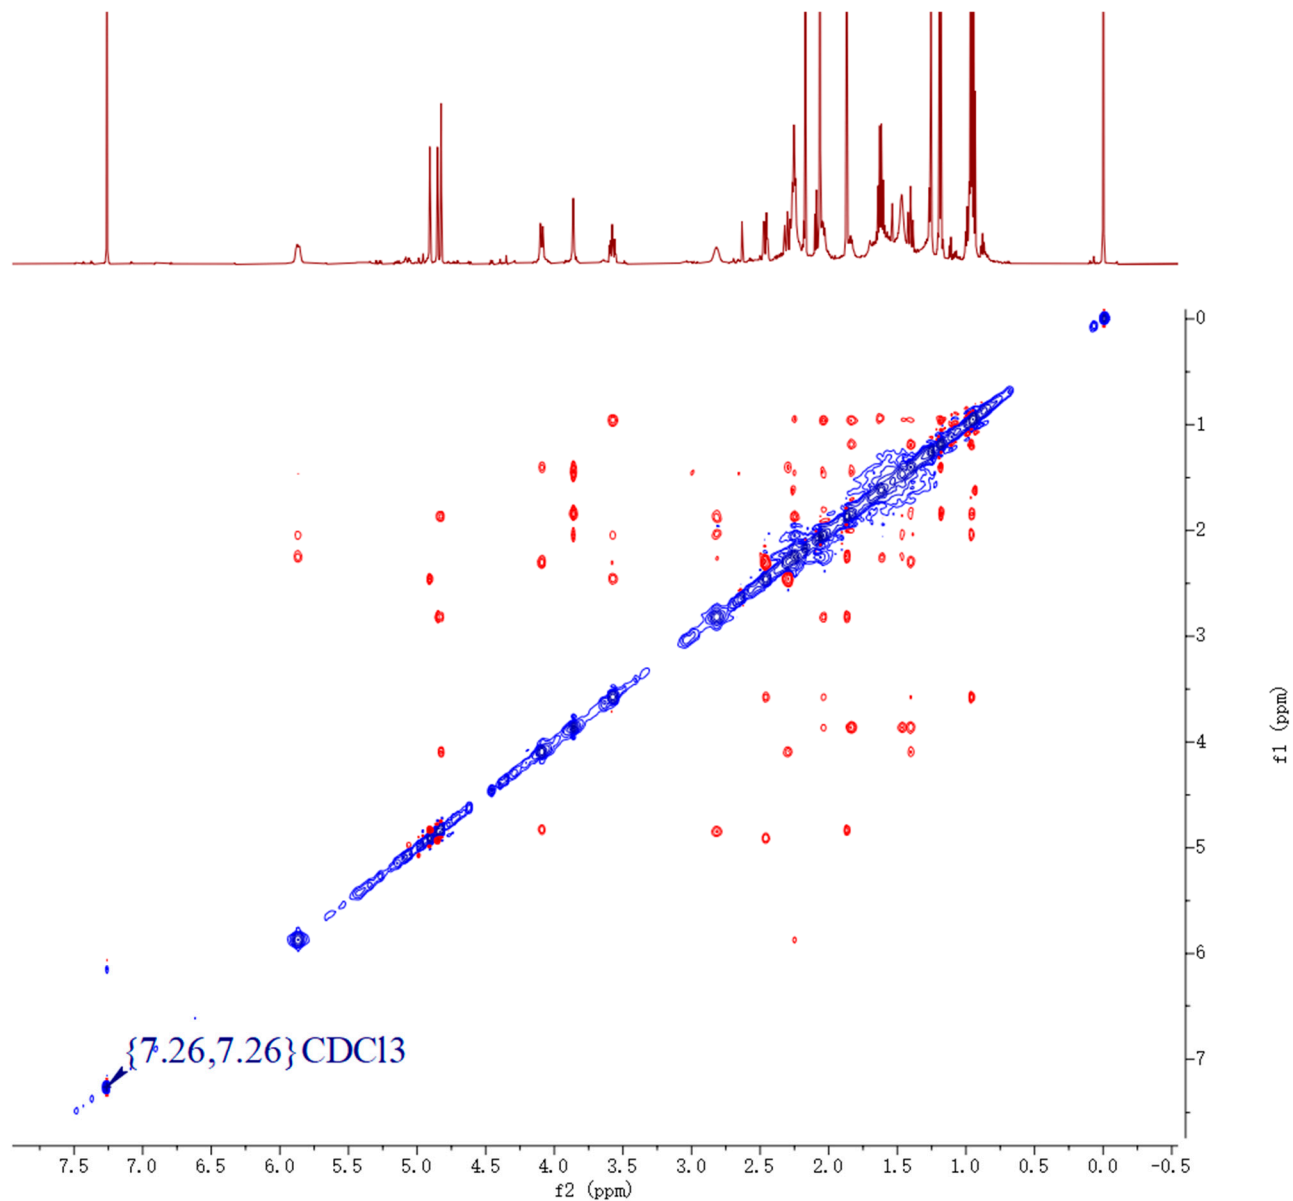

**Figure S30.** NOESY spectrum of litophynin K (4) in  $\text{CDCl}_3$ .



## Qualitative Analysis Report

**Data Filename** ESIH\_20200508\_GYW\_SLL\_07.d  
**Sample Type** Sample  
**Instrument Name** Agilent G6520 Q-TOF  
**Acquired Time** 5/8/2020 16:31:08  
**DA Method** small molecular data analysis method.m

**Sample Name** A8-DBE-6  
**Position** P1-C7  
**Acq Method** 20160322\_MS\_ESIH\_POS\_1min.m  
**IRM Calibration Status** Success  
**Comment** ESIH by ZZY

### User Spectra

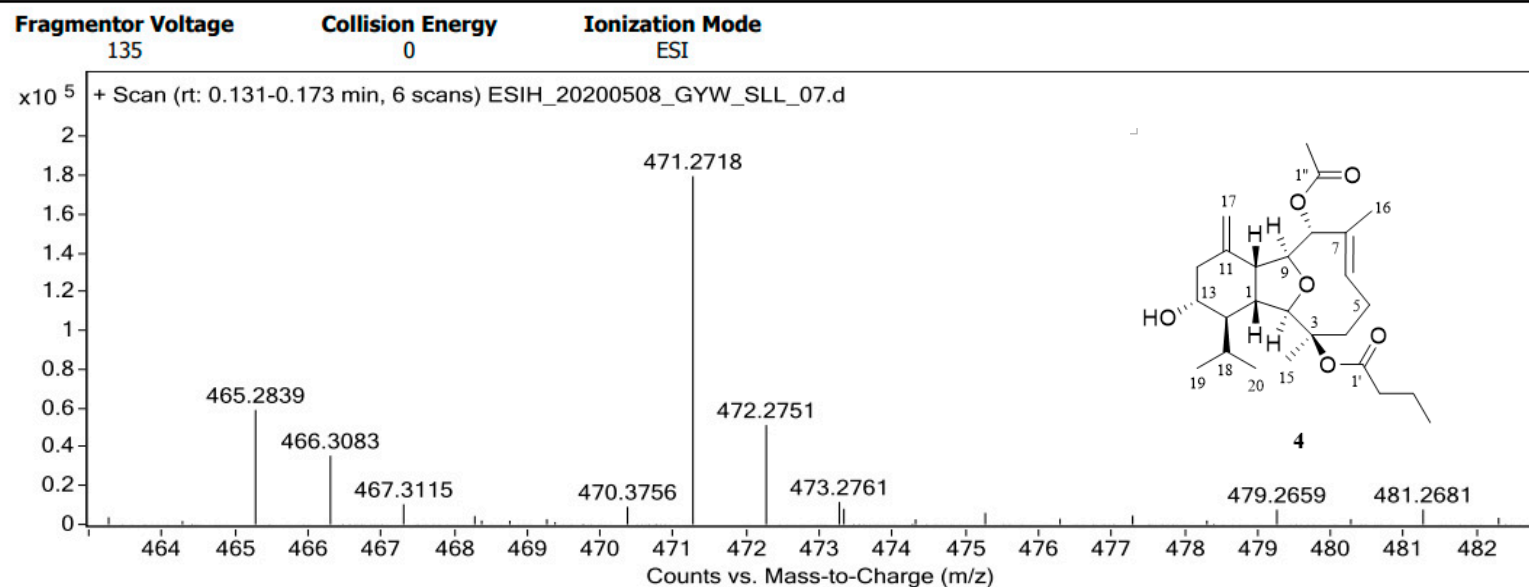

### Formula Calculator Results

| m/z      | Calc m/z | Diff (mDa) | Diff (ppm) | Ion Formula                                       | Ion                 |
|----------|----------|------------|------------|---------------------------------------------------|---------------------|
| 471.2718 | 471.2717 | -0.08      | -0.17      | C <sub>26</sub> H <sub>40</sub> Na O <sub>6</sub> | (M+Na) <sup>+</sup> |

--- End Of Report ---

**Figure S31.** HRESIMS spectrum of litophynin K (**4**) in MeOH.

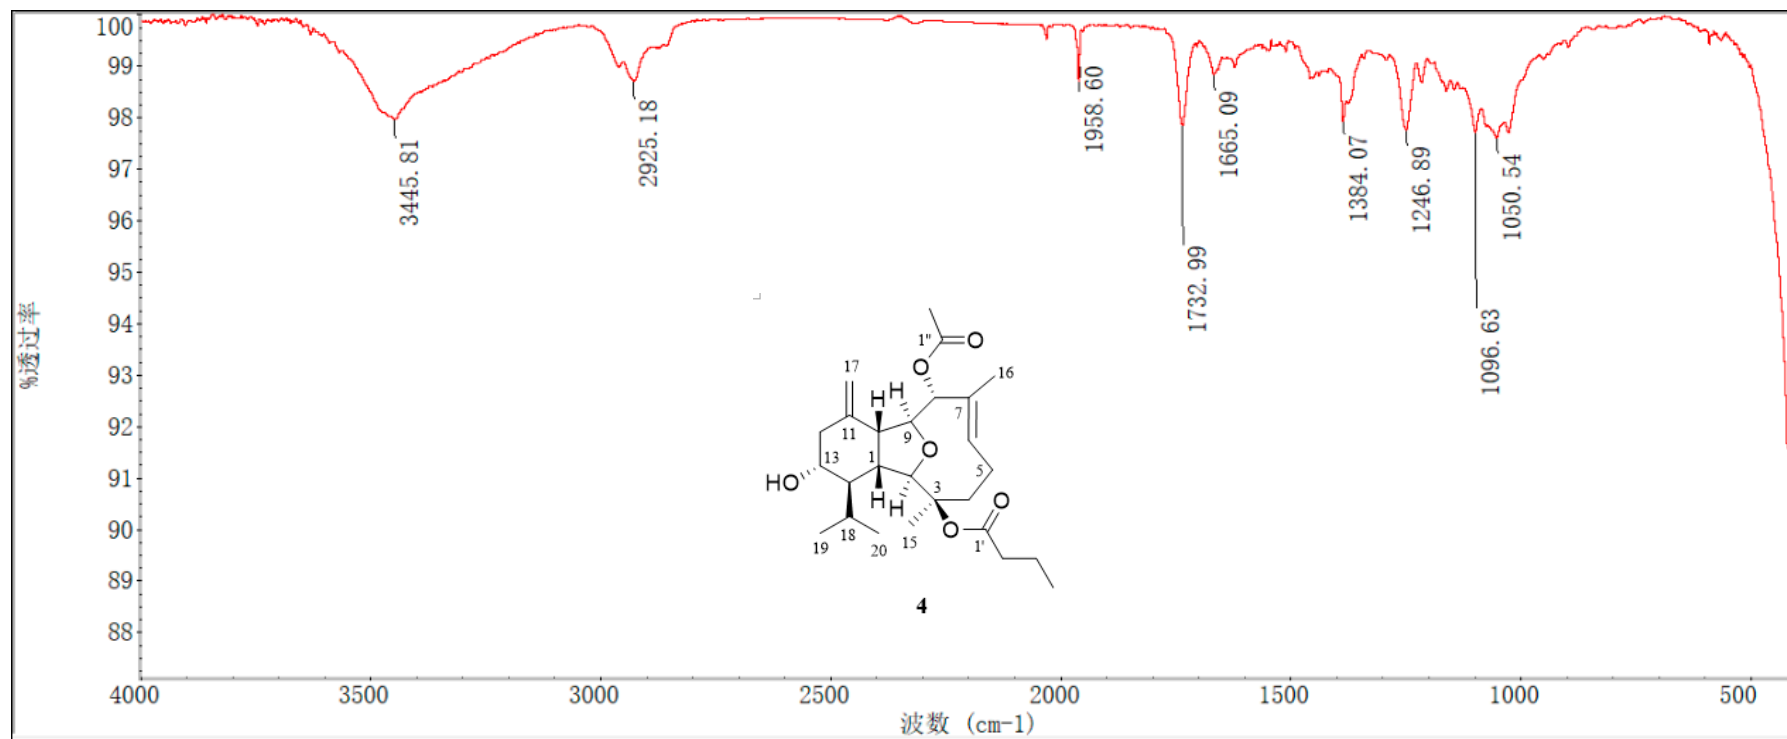

**Figure S32.** IR spectrum of lithophynin K (4).

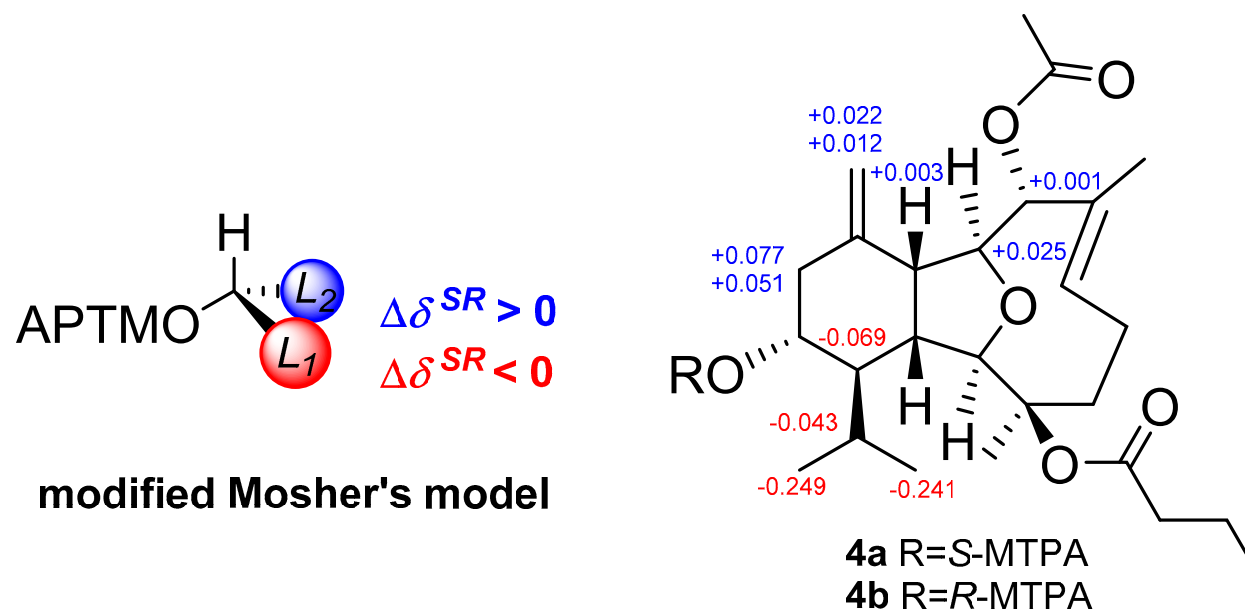

**Figure S33.** Application of the modified Mosher's method for AC determination of the secondary alcohol on **4**. Values of  $\Delta\delta^{SR}$  [ $\Delta(\delta_S - \delta_R)$ ] were given in ppm. Regions (+ and -) were marked in blue and red, respectively.

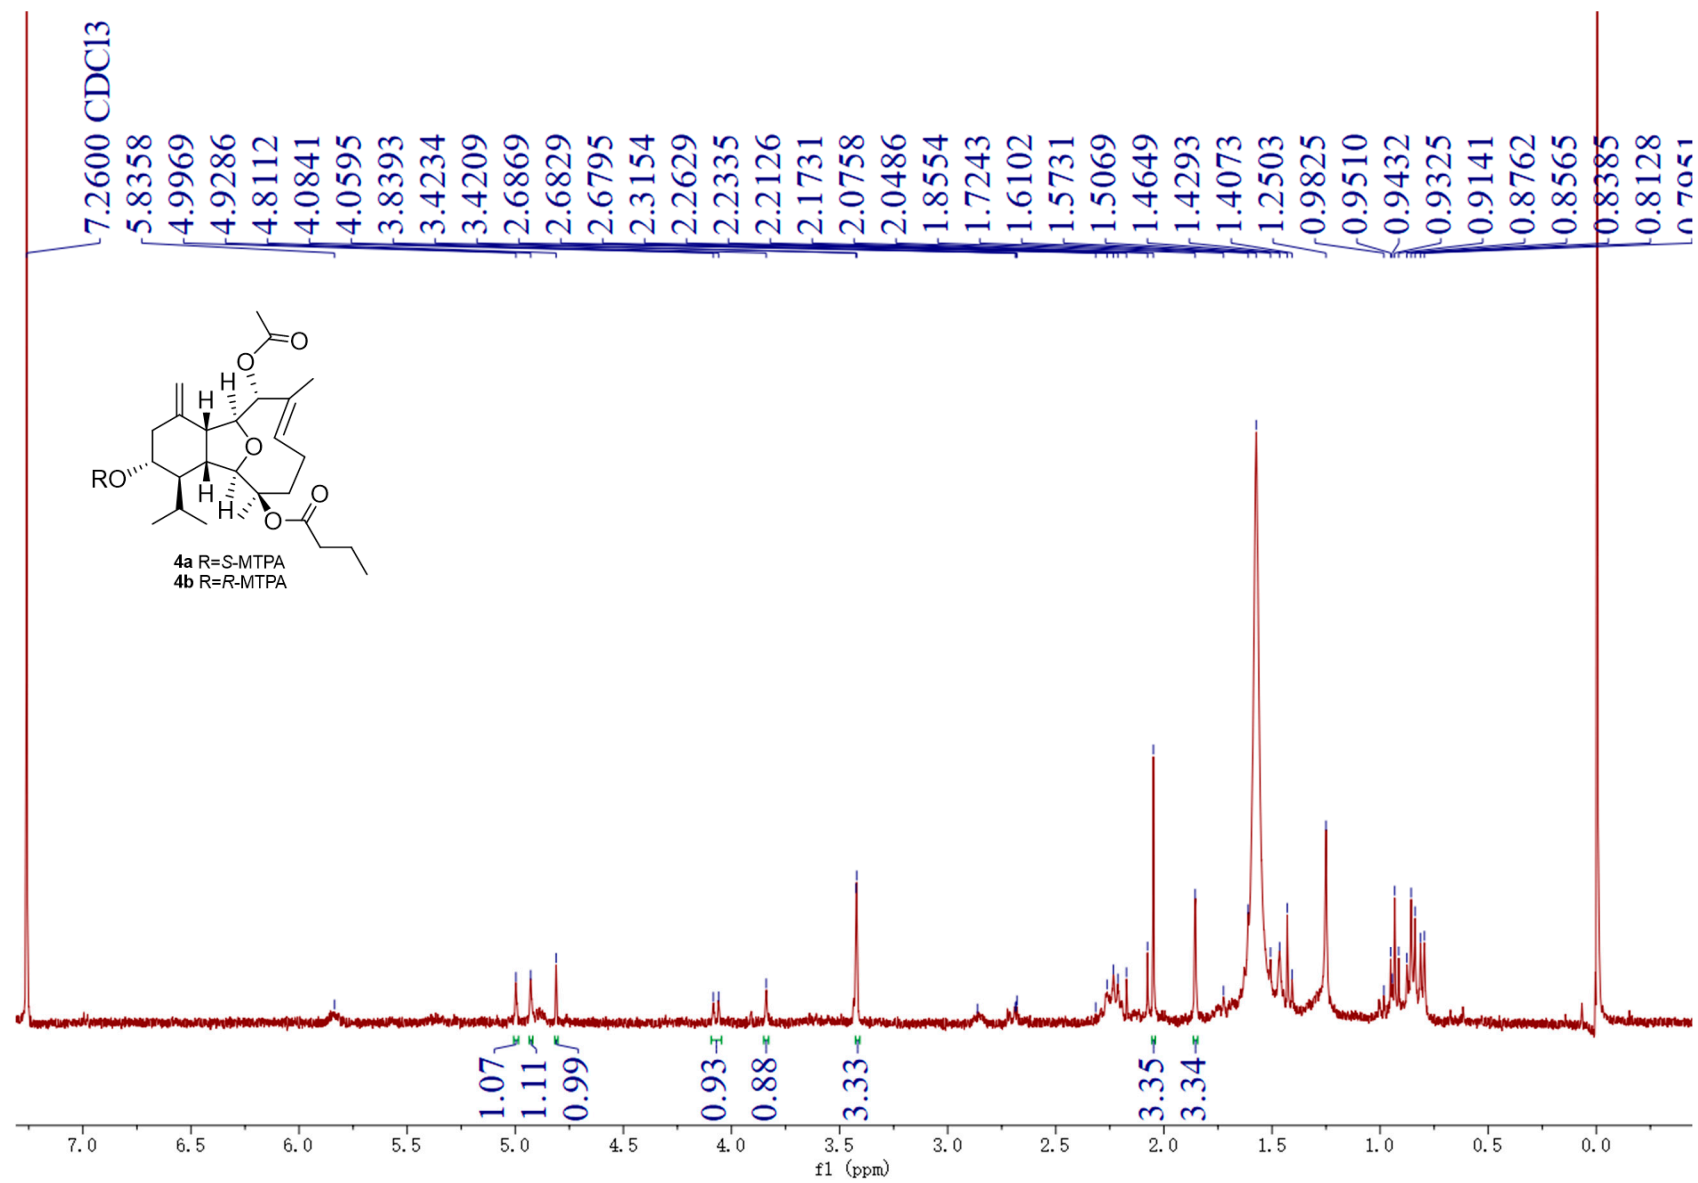

**Figure S34.**  $^1\text{H}$  NMR spectrum of **4a** in  $\text{CDCl}_3$ .

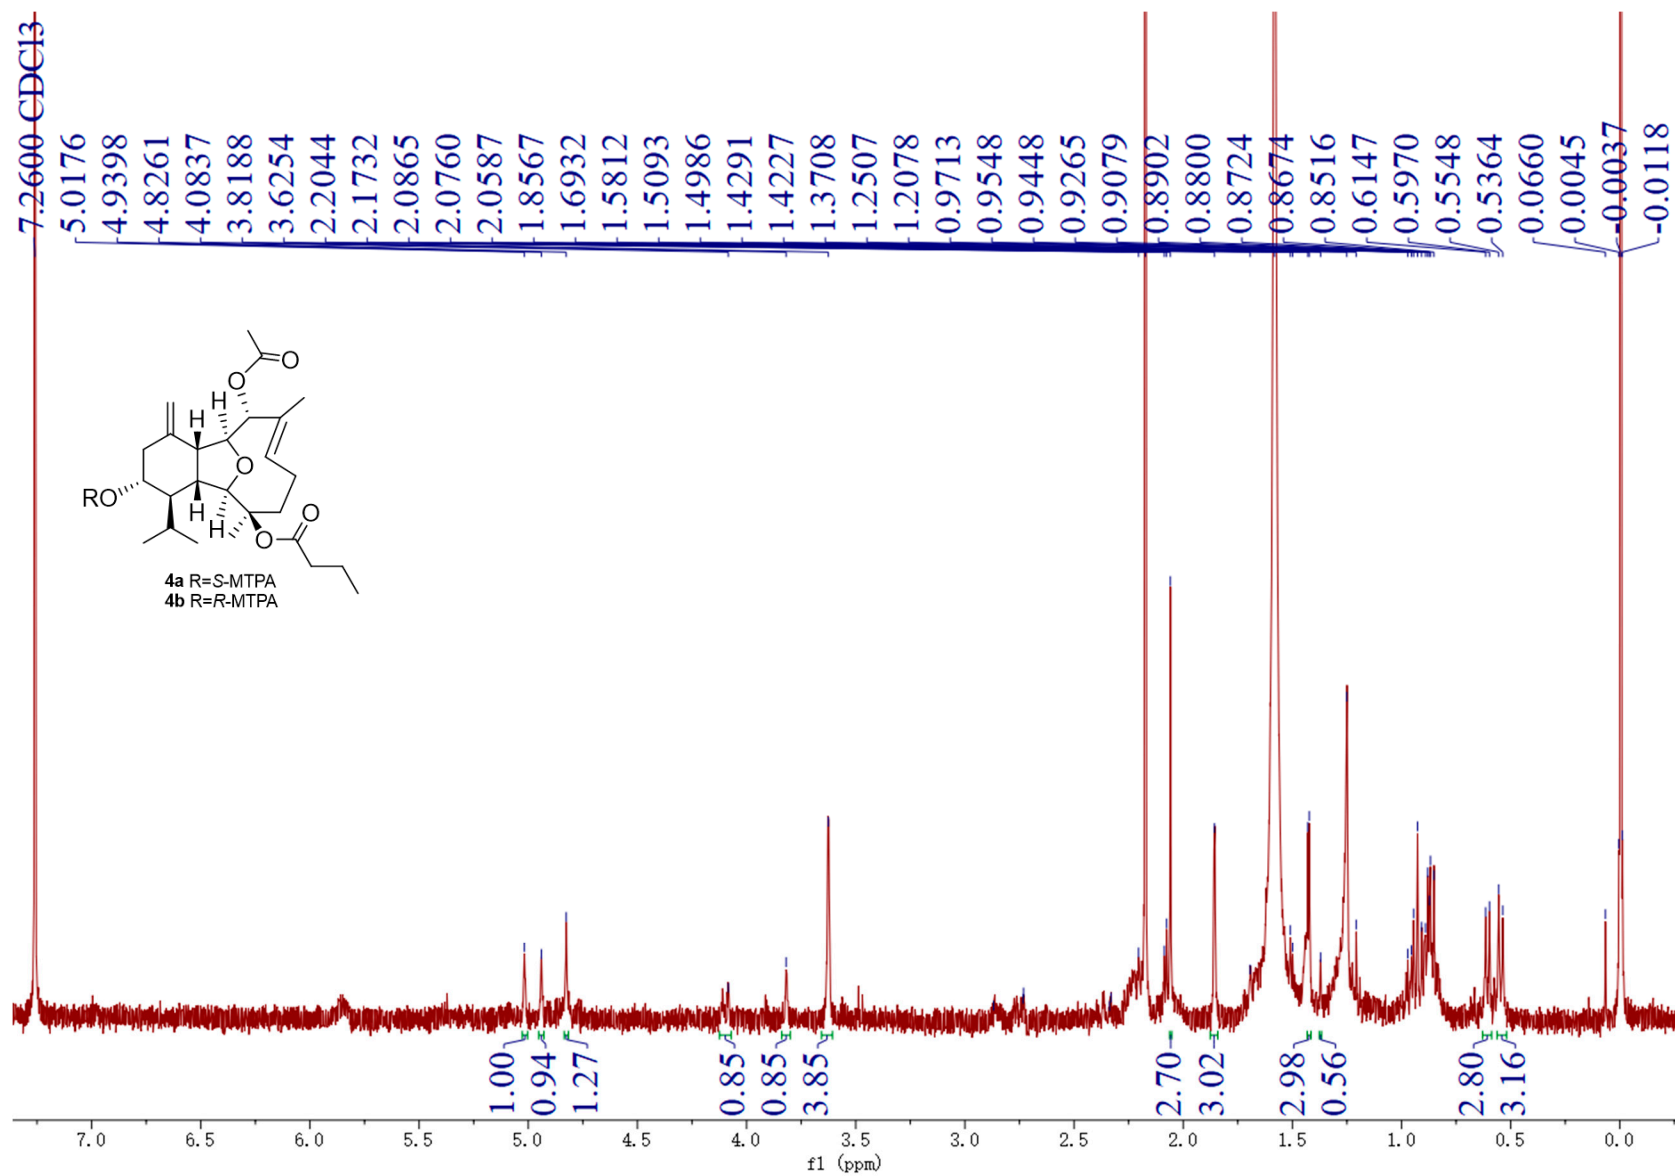

Figure S35. <sup>1</sup>H NMR spectrum of **4b** in CDCl<sub>3</sub>.

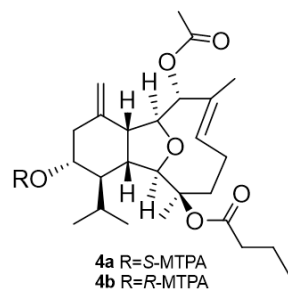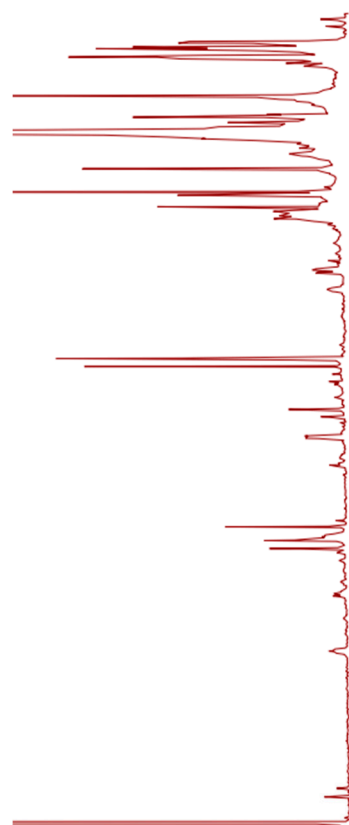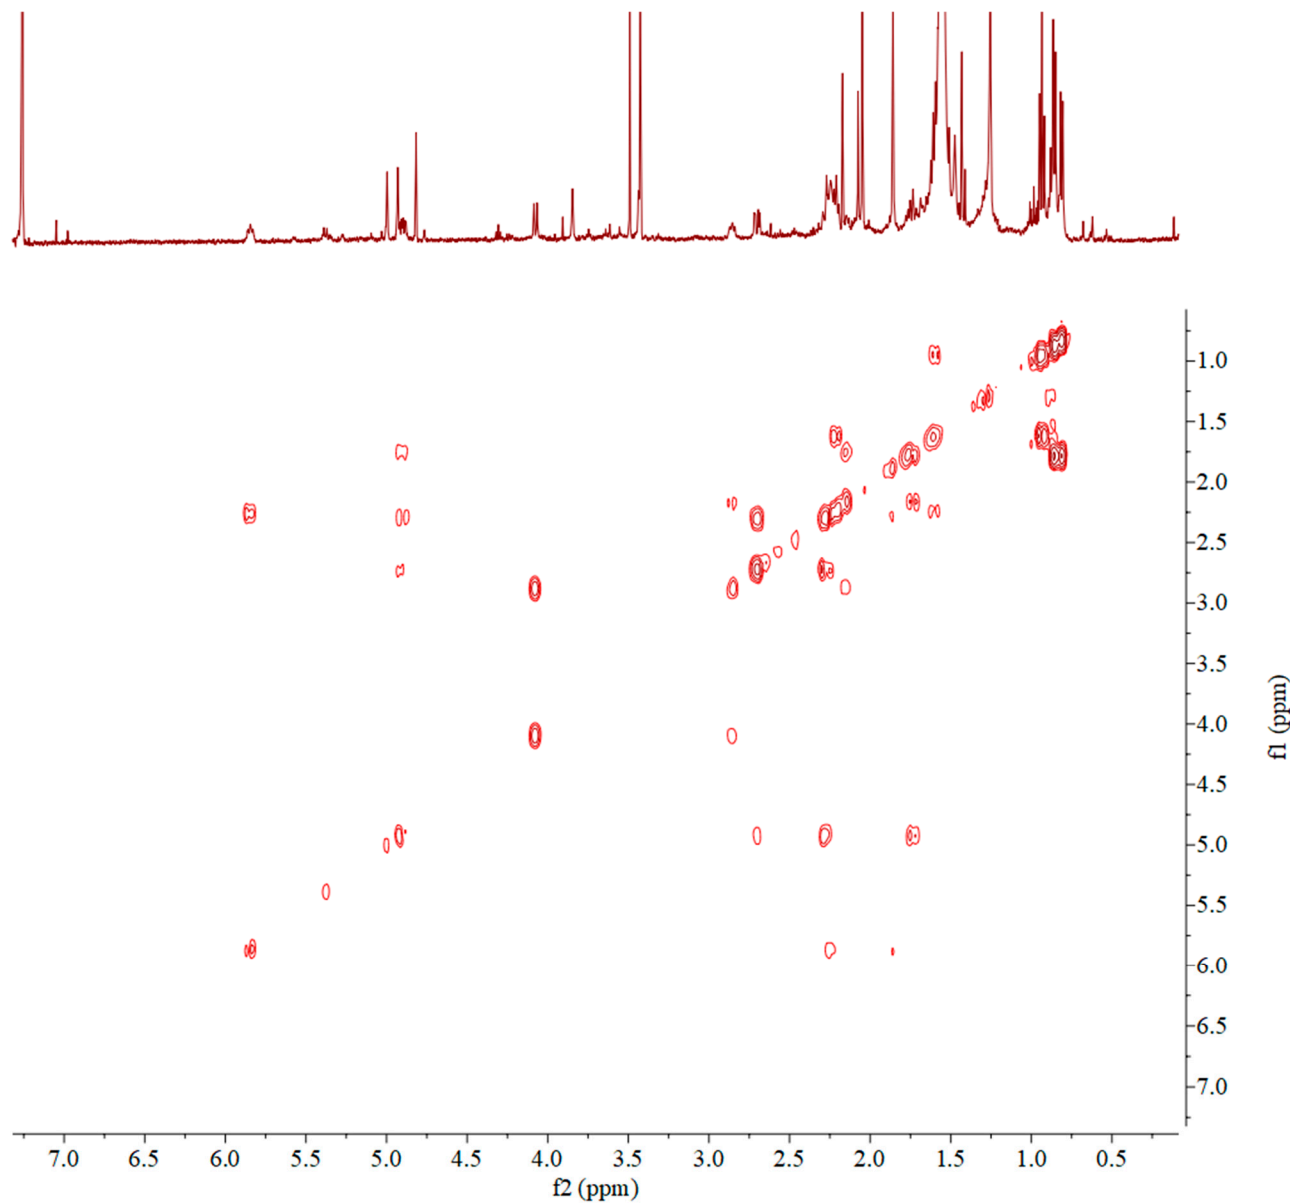

**Figure S36.**  $^1\text{H}$ - $^1\text{H}$  COSY spectrum of **4a** in  $\text{CDCl}_3$ .

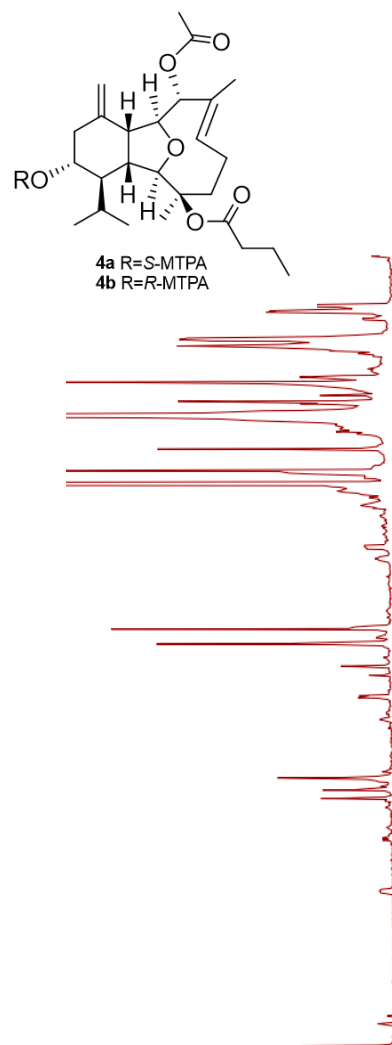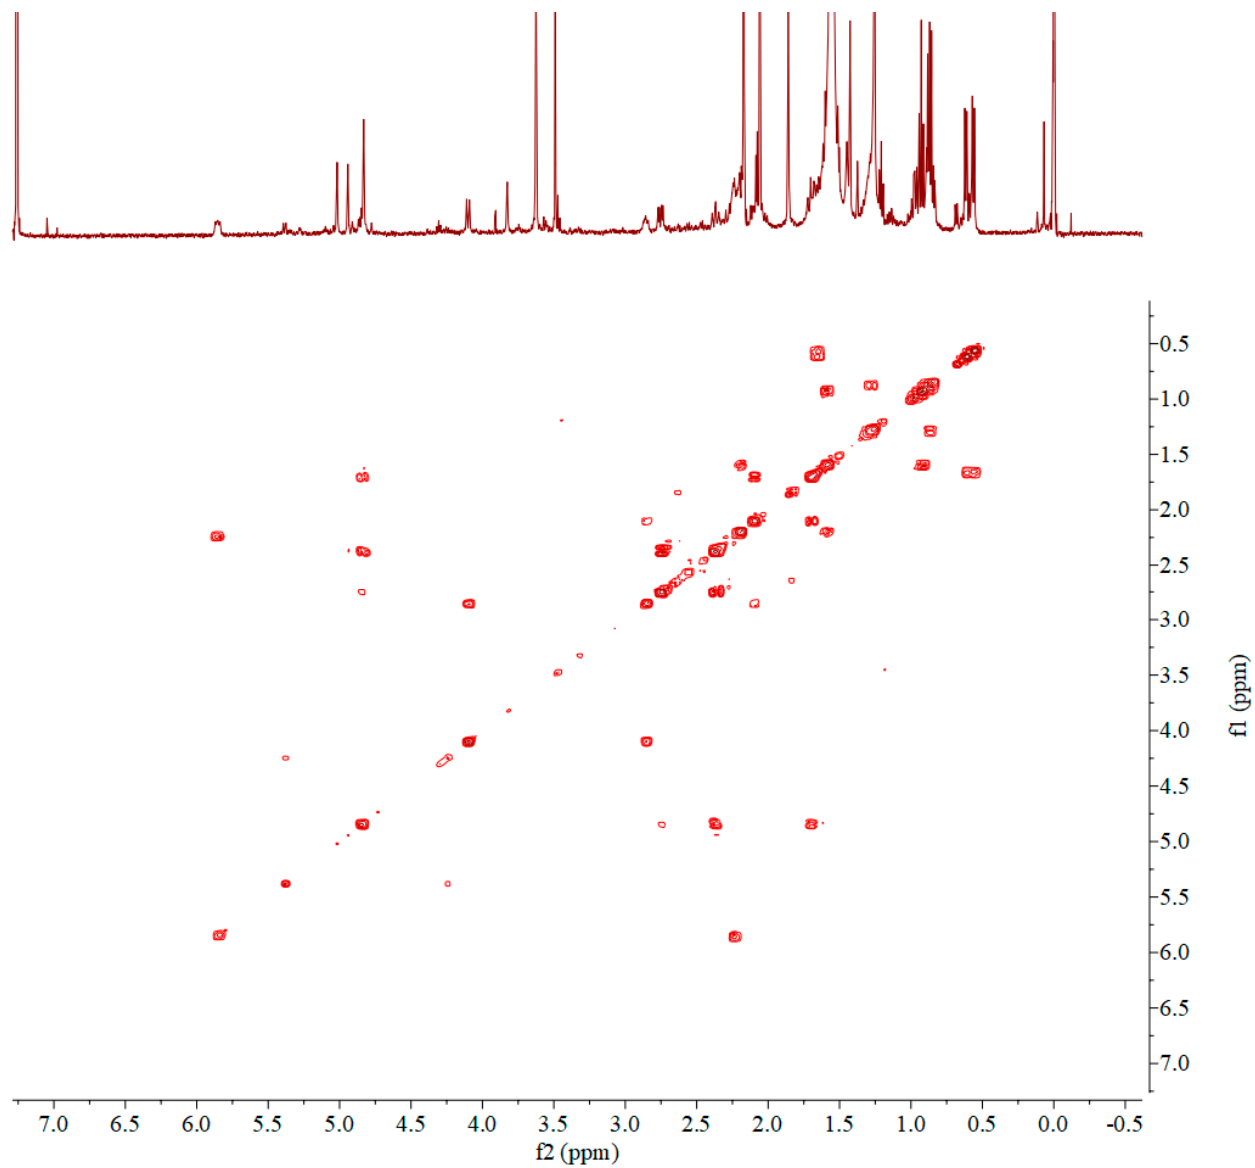

Figure S37.  $^1\text{H}$ - $^1\text{H}$  COSY spectrum of 4b in  $\text{CDCl}_3$

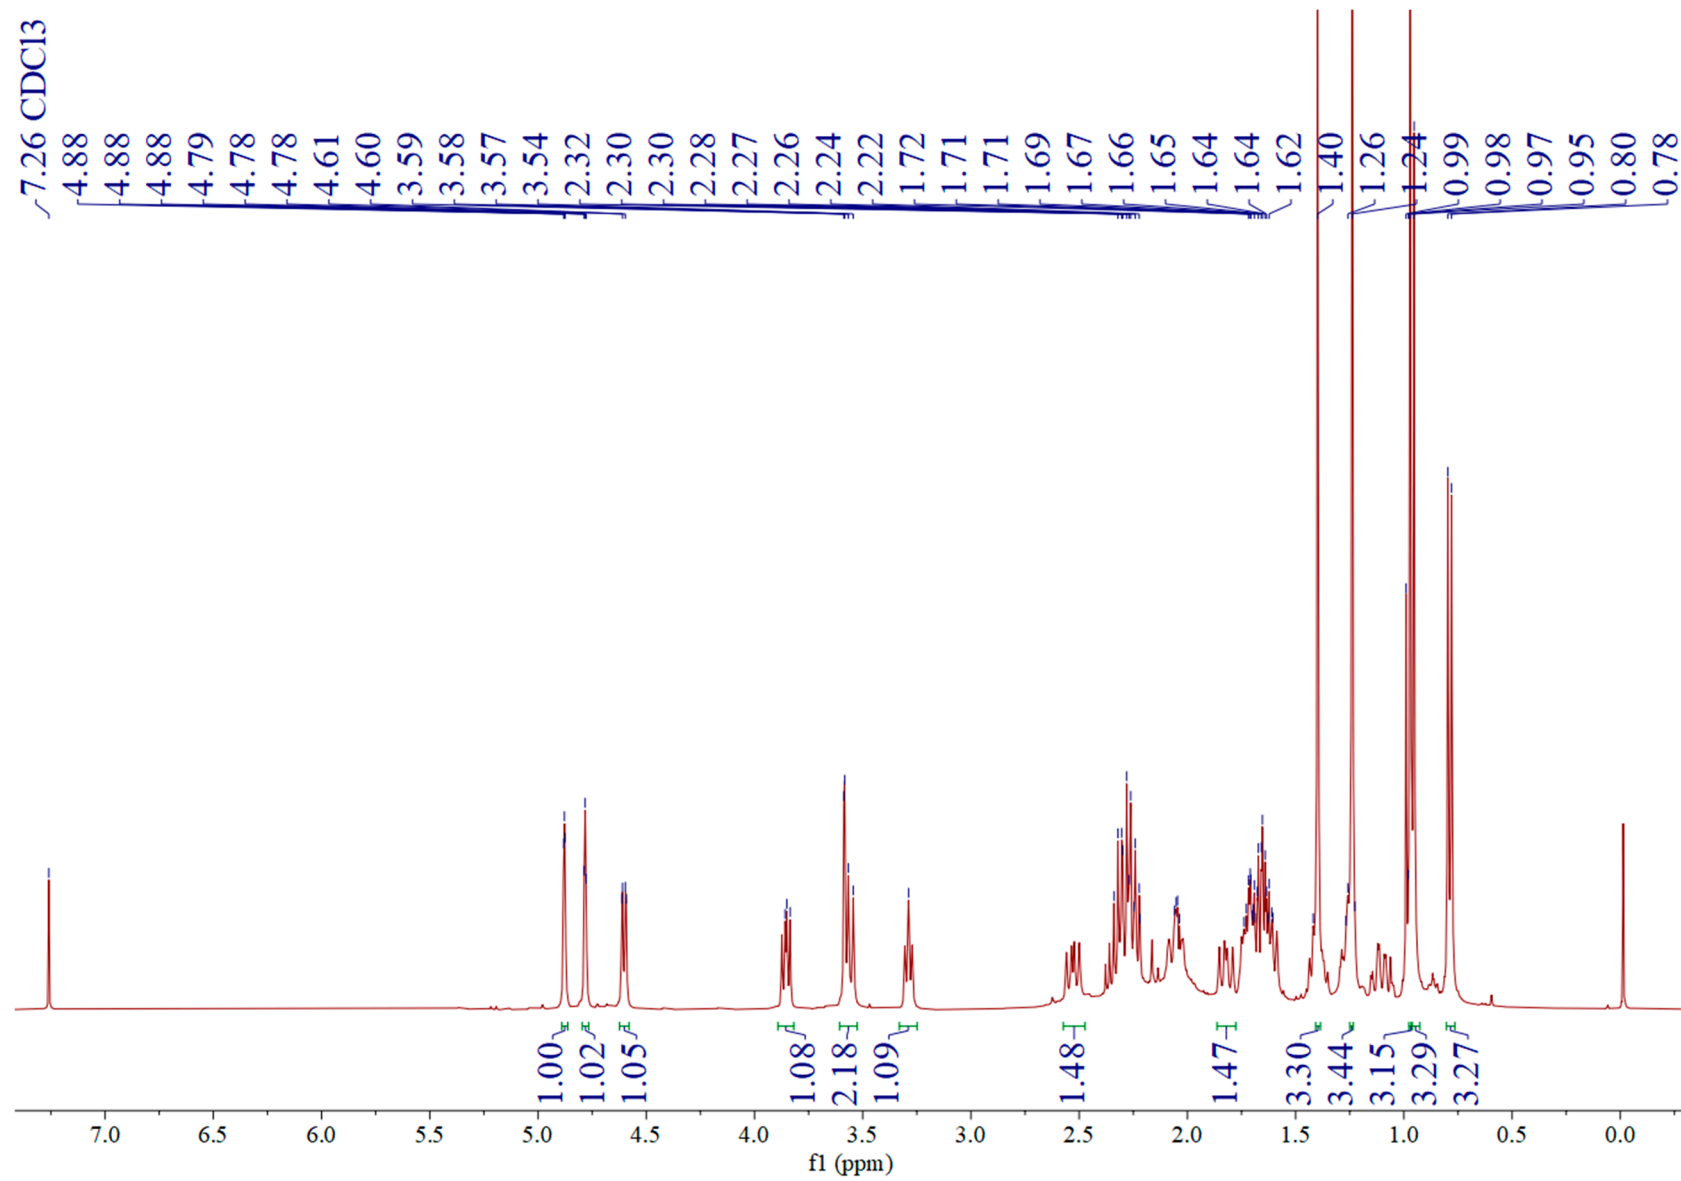

**Figure S38.** <sup>1</sup>H NMR spectrum of lithophynol B (**5**) in CHCl<sub>3</sub>.



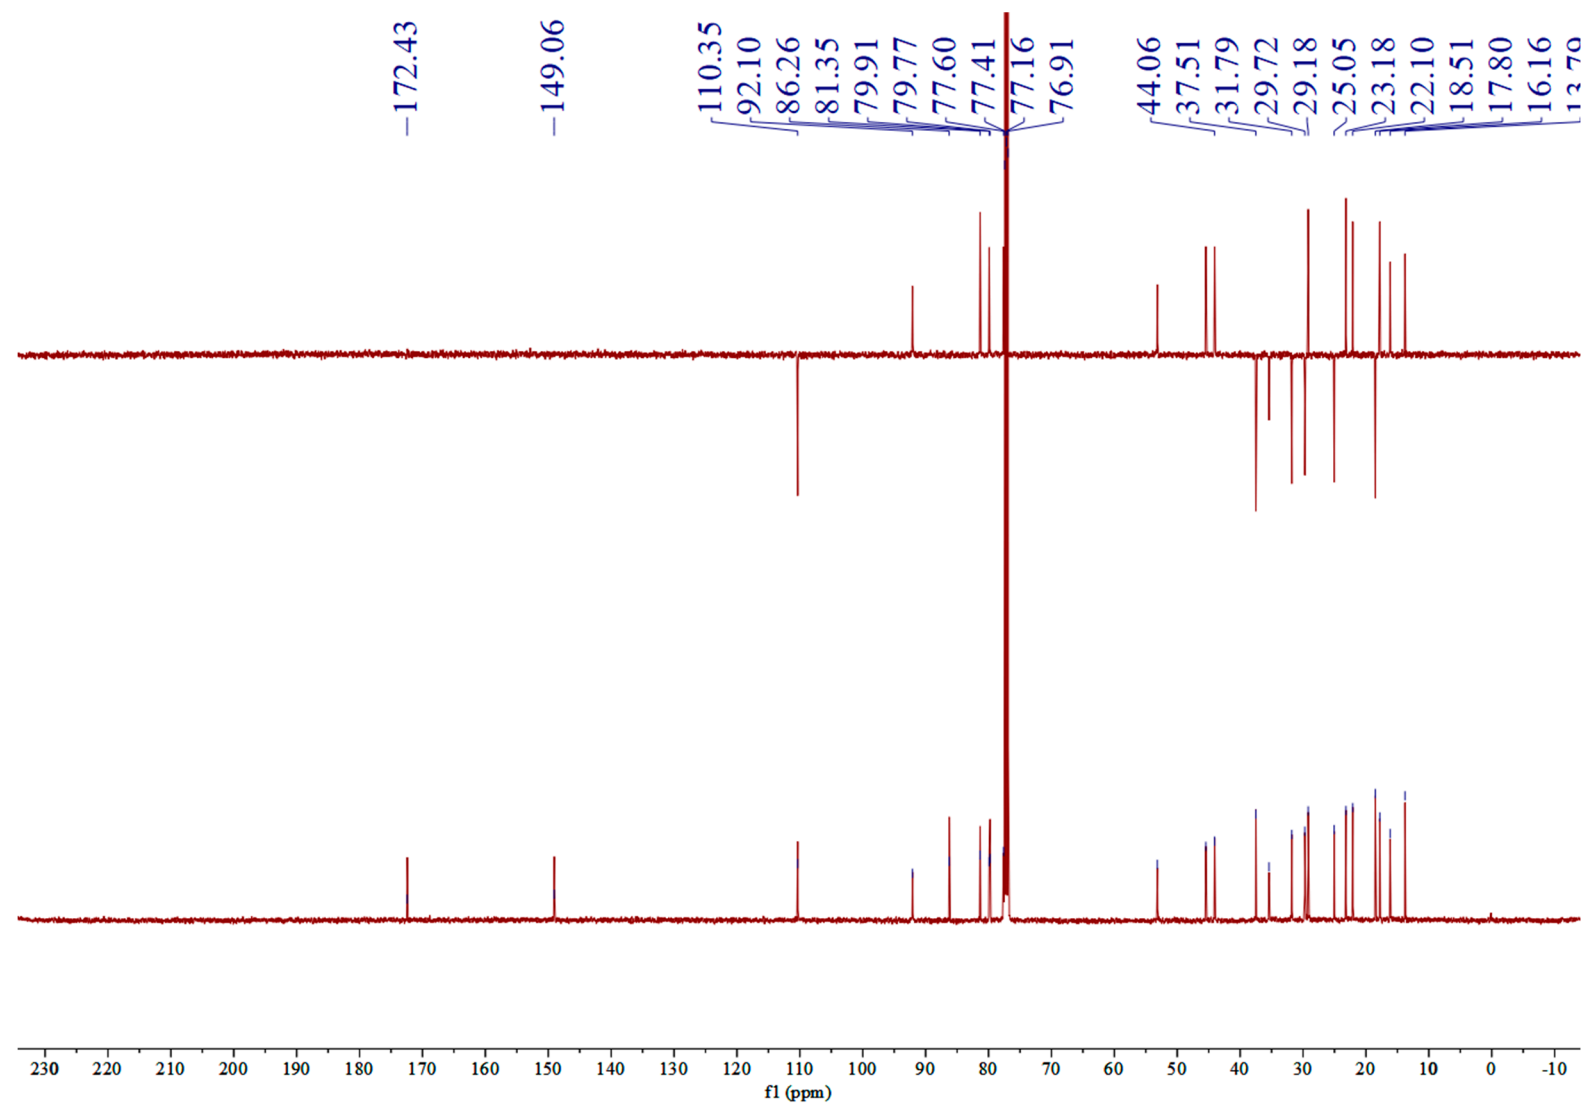

**Figure S39.** <sup>13</sup>C NMR spectrum of litophynol B (**5**) in CH<sub>2</sub>Cl<sub>2</sub>
